# Supplementary material for: Infiltration of Immunoinflammatory Cells and Related Chemokine/Interleukin Expression in Different Gastric Immune Microenvironments
Source: PubMed Central journal article supplement (PMC7774301; doi:10.1155/2020/2450569), 2020-12-23
Supplement: 2450569.f1.pdf [file 2450569.f1.pdf]

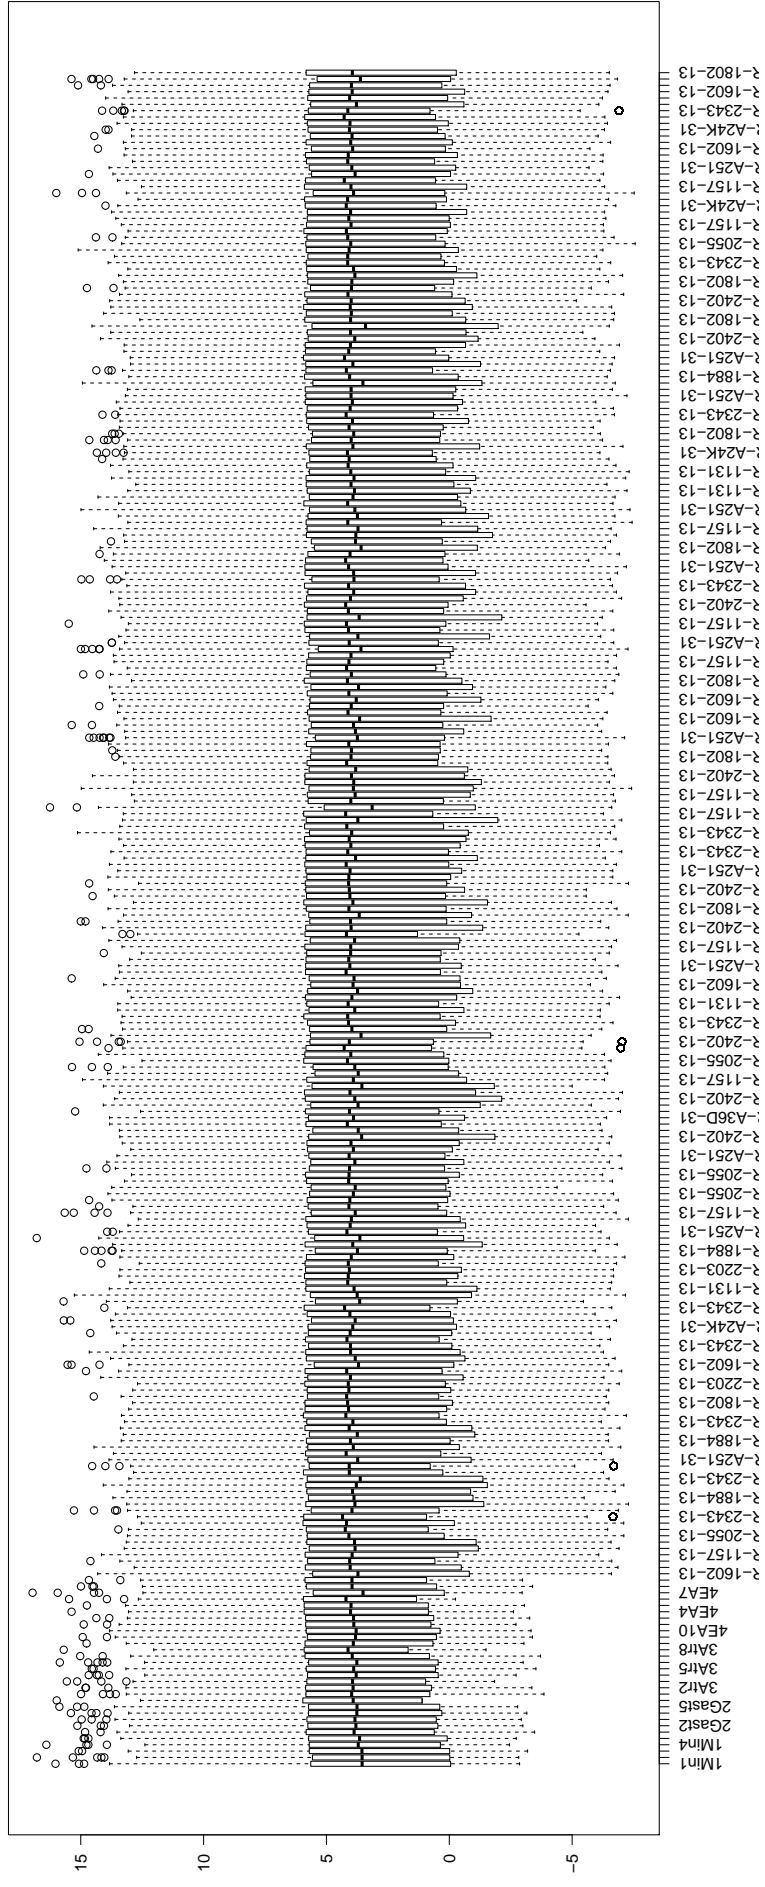

Figure S1. The normalization of the data using voom method.
