# Supplementary material for: Infiltration of Immunoinflammatory Cells and Related Chemokine/Interleukin Expression in Different Gastric Immune Microenvironments
Source: Hindawi journal article supplement (doi:10.1155/2020/2450569), 2020-01-01
Supplement: f2 [file 2450569.f2.pdf]

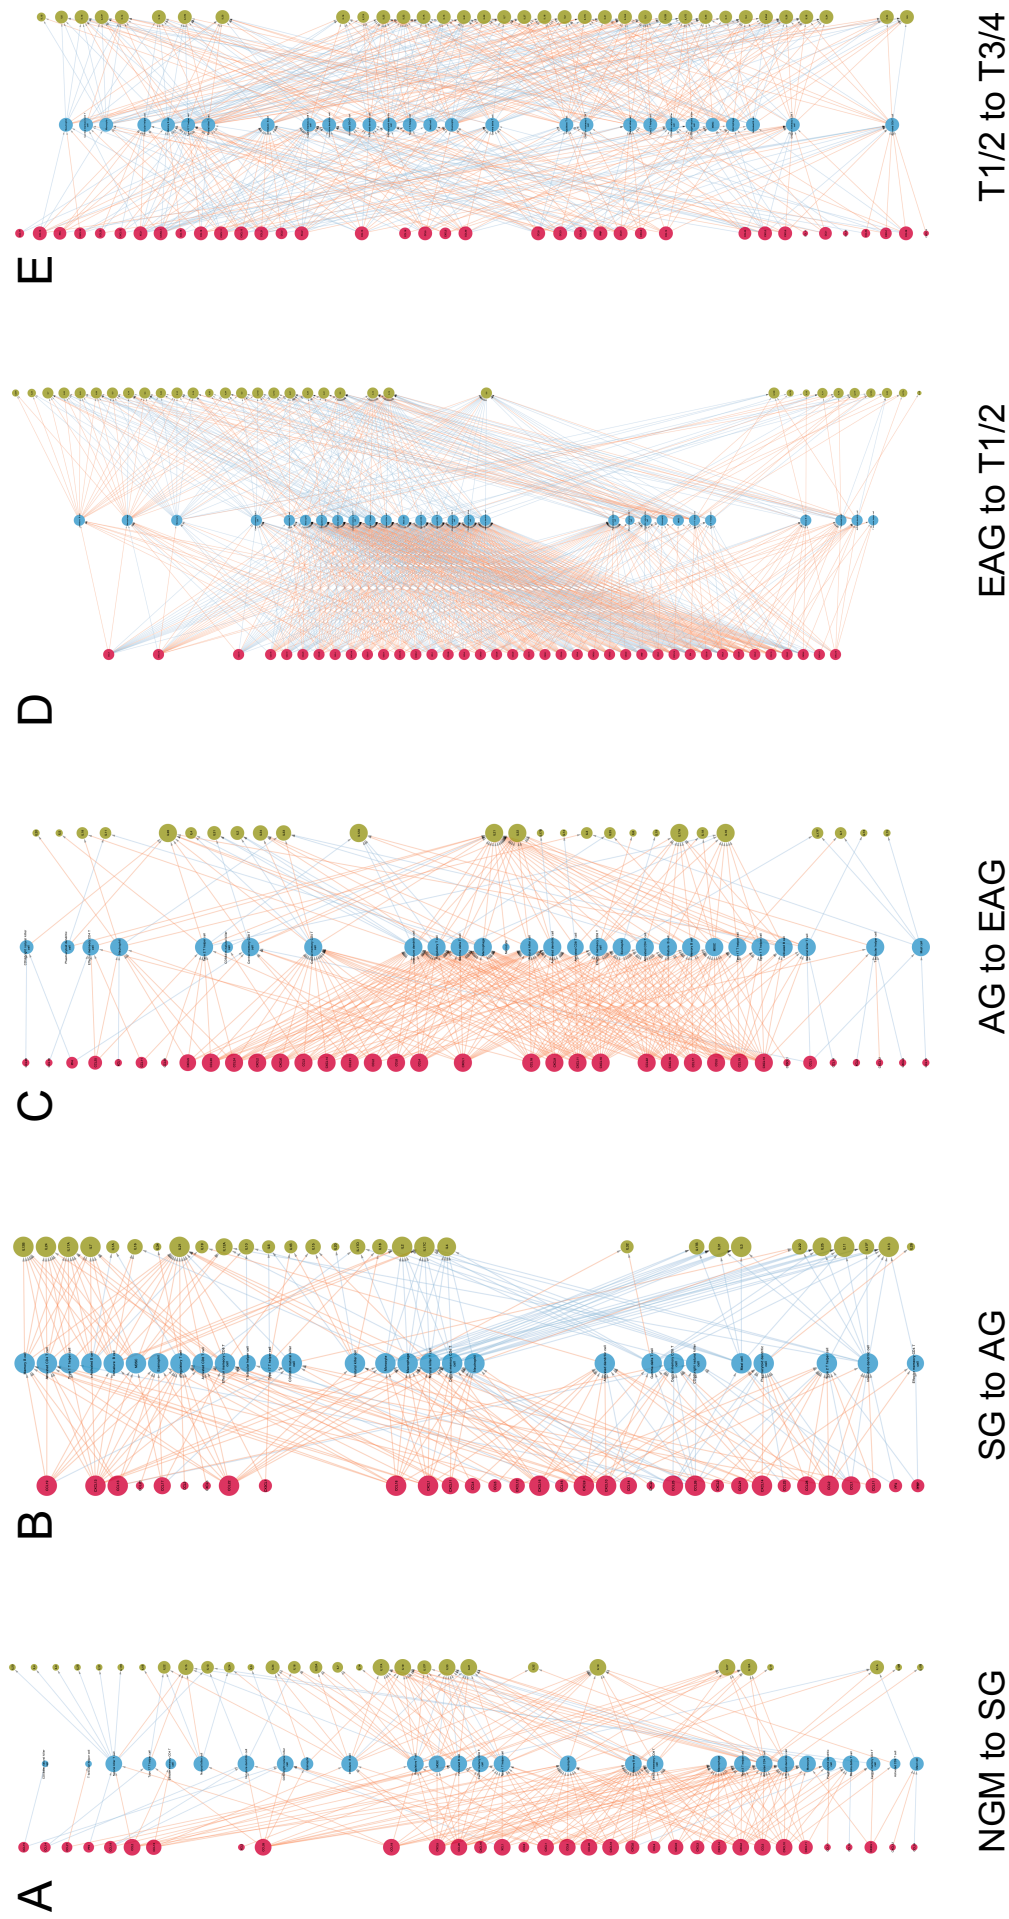

Figure S1. Correlation between the number of immune cells and the expression of interleukins, chemokines in different stages of gastric diseases at dynamic level. Red circles indicate chemokines; blue circles indicate immune cells; green circles indicate interleukins. (A) From NGM to SG; (B) From SG to AG; (C) From AG to EAG; (D) From EAG to T1/2; (E) From T1/2 to T3/4
