# Supplementary material for: Infiltration of Immunoinflammatory Cells and Related Chemokine/Interleukin Expression in Different Gastric Immune Microenvironments
Source: J Immunol Res. 2020 Dec 23;2020:2450569. doi: 10.1155/2020/2450569 (PMC7774301; doi:10.1155/2020/2450569)
Supplement: Supplementary 9 — Table S7-1-1: the results of the correlation between chemokines and immune cells in NGM by PLSR. Table S7-1-2: the results of the correlation between immune cells and interleukins in NGM by PLSR. Table S7-2-1: the results of the correlation between chemokines and immune cells in SG by PLSR. Table S7-2-2: the results of the correlation between immune cells and interleukins in SG by PLSR. Table S7-3-1: the results of the correlation between chemokines and immune cells in AG by PLSR. Table S7-3-2: the results of the correlation between immune cells and interleukins in AG by PLSR. Table S7-4-1: the results of the correlation between chemokines and immune cells in EAG by PLSR. Table S7-4-2: the results of the correlation between immune cells and interleukins in EAG by PLSR. Table S7-5-1: the results of the correlation between chemokines and immune cells in T1/2 by PLSR. Table S7-5-2: the results of the correlation between immune cells and interleukins in T1/2 by PLSR. Table S7-6-1: the results of the correlation between chemokines and immune cells in T3/4 by PLSR. Table S7-6-2: the results of the correlation between immune cells and interleukins in T3/4 by PLSR. Table S7-7-1: the results of the correlation between chemokines and immune cells in diffuse gastric cancer by PLSR. Table S7-7-2: the results of the correlation between immune cells and interleukins in diffuse gastric cancer by PLSR. Table S7-8-1: the results of the correlation between chemokines and immune cells in intestinal gastric cancer by PLSR. Table S7-8-2: the results of the correlation between immune cells and interleukins in intestinal gastric cancer by PLSR. [file 2450569.f9.xlsx]

## Sheet: NGM
Table S7-1-1 The results of correlation between chemokines and immune cells in NGM by PLSR					Table S7-1-2 The results of correlation between immune cells and interleukins in NGM by PLSR
Chemokine	Estimate	Immune Cell	Sign		Immune Cell	Estimate	Interleukin	Sign
CXCL13	0.0092408	Activated B cell	1		Activated CD4 T cell	-6.76923	IL11	-1
CCL28	0.0020274	Activated CD4 T cell	1		Central memory CD8 T cell	-2.06661	IL11	-1
CCL24	0.002999	Activated CD4 T cell	1		Mast cell	8.02833	IL11	1
CCL15	0.0029051	Activated CD4 T cell	1		Activated CD4 T cell	9.44301	IL12B	1
CXCL16	0.00022044	Activated dendritic cell	1		MDSC	4.60407	IL12B	1
CXCL1	0.00078156	Activated dendritic cell	1		Memory B cell	-5.84724	IL12B	-1
CCL28	0.00050831	Activated dendritic cell	1		Central memory CD8 T cell	0.898	IL15	1
CCL24	0.00098026	Activated dendritic cell	1		Type 17 T helper cell	1.73741	IL15	1
CCL13	0.00080876	Activated dendritic cell	1		Natural killer cell	3.64515	IL17D	1
CCL14	-0.0010829	Central memory CD8 T cell	-1		Activated CD4 T cell	7.85241	IL17D	1
CXCL13	0.0026829	Effector memeory CD4 T cell	1		Activated B cell	15.6928	IL24	1
CXCL13	0.0017428	Gamma delta T cell	1		Central memory CD8 T cell	2.82193	IL24	1
CCL8	0.0033387	Macrophage	1		Effector memeory CD8 T cell	5.44133	IL24	1
CCL18	-0.0016051	Macrophage	-1		Immature B cell	8.06788	IL24	1
CCL24	-0.002268	Mast cell	-1		Plasmacytoid dendritic cell	2.51138	IL24	1
CCL15	-0.0021184	Mast cell	-1		T follicular helper cell	2.96483	IL24	1
CX3CL1	0.0011514	Monocyte	1		Central memory CD8 T cell	0.160207	IL32	1
CCL19	0.0018343	Monocyte	1		Effector memeory CD8 T cell	0.205506	IL32	1
CXCL13	0.001461	Plasmacytoid dendritic cell	1		Immature B cell	0.260884	IL32	1
CXCL11	0.00094134	Plasmacytoid dendritic cell	1		Type 17 T helper cell	-0.557113	IL33	-1
CCL22	0.0017267	Regulatory T cell	1		Eosinophil	0.670143	IL14	1
CCL18	0.00044047	Type 1 T helper cell	1
CX3CL1	-0.0017711	Type 17 T helper cell	-1
CCL28	0.0010983	Type 17 T helper cell	1
CCL24	0.0012564	Type 17 T helper cell	1
CCL19	-0.001968	Type 17 T helper cell	-1

## Sheet: SG
Table S7-2-1 The results of correlation between chemokines and immune cells in SG by PLSR					Table S7-2-2 The results of correlation between immune cells and interleukins in SG by PLSR
Chemokine	Estimate	Immune Cell	Sign		Immune Cell	Estimate	Interleukin	Sign
CCL19	0.00782539	Activated B cell	1		Mast cell	-2.10645	IL1A	-1
CCL15	0.00861264	Activated B cell	1		Plasmacytoid dendritic cell	-0.543102	IL1A	-1
CXCL5	0.00618397	Activated CD4 T cell	1		T follicular helper cell	-1.01813	IL1A	-1
CXCL3	0.00409866	Activated CD4 T cell	1		Gamma delta T cell	3.22475	IL1B	1
CXCL2	0.00120843	Activated CD4 T cell	1		CD56bright natural killer cell	-3.36847	IL2	-1
CXCL11	0.00329623	Activated CD4 T cell	1		CD56bright natural killer cell	-2.32661	IL4	-1
CXCL10	0.00330183	Activated CD4 T cell	1		Macrophage	-2.56804	IL4	-1
CXCL1	0.00109949	Activated CD4 T cell	1		Natural killer cell	-3.97344	IL4	-1
CCL28	0.00135237	Activated CD4 T cell	1		Type 17 T helper cell	-1.7769	IL4	-1
CCL20	0.00501209	Activated CD4 T cell	1		Central memory CD4 T cell	-0.643135	IL5	-1
CXCL10	0.0026571	Activated CD8 T cell	1		Gamma delta T cell	-1.41689	IL5	-1
CX3CL1	0.0013618	Activated CD8 T cell	1		Immature B cell	2.61255	IL5	1
CCL4	0.0012382	Activated CD8 T cell	1		Monocyte	-0.329036	IL5	-1
CCL28	0.0010233	Activated CD8 T cell	1		Plasmacytoid dendritic cell	-0.49408	IL5	-1
CCL14	-0.0041053	Activated CD8 T cell	-1		Mast cell	-0.422309	IL7	-1
CXCL5	0.0043836	Activated dendritic cell	1		Effector memeory CD4 T cell	-0.225022	IL11	-1
CXCL14	0.00062703	Activated dendritic cell	1		Natural killer cell	3.46859	IL15	1
CCL5	0.0010543	Activated dendritic cell	1		Effector memeory CD8 T cell	-0.952822	IL16	-1
CCL28	0.0011573	Activated dendritic cell	1		Gamma delta T cell	-1.46933	IL16	-1
CCL20	0.0029815	Activated dendritic cell	1		Activated B cell	2.24877	IL17B	1
CCL17	0.0036318	Activated dendritic cell	1		CD56bright natural killer cell	-2.60757	IL17D	-1
CCL16	-0.0030866	Activated dendritic cell	-1		Immature B cell	3.6276	IL17F	1
CCL14	-0.0032941	Activated dendritic cell	-1		Macrophage	1.36471	IL18	1
CCL4	0.00072087	CD56bright natural killer cell	1		Natural killer cell	2.45397	IL18	1
CCL13	-0.00253428	CD56bright natural killer cell	-1		Natural killer T cell	0.760839	IL18	1
PPBP	-0.000711	CD56dim natural killer cell	-1		Type 17 T helper cell	1.34941	IL18	1
CXCL6	-0.000547	CD56dim natural killer cell	-1		CD56dim natural killer cell	-0.972314	IL21	-1
CCL5	0.000264	CD56dim natural killer cell	1		Activated B cell	2.92298	IL22	1
CCL16	-0.00109	CD56dim natural killer cell	-1		Activated B cell	3.11044	IL24	1
CCL11	0.000787	CD56dim natural killer cell	1		Activated dendritic cell	-0.887316	IL24	-1
CXCL9	0.00093029	Central memory CD4 T cell	1		Eosinophil	0.676446	IL24	1
CXCL11	0.0012174	Central memory CD4 T cell	1		Immature B cell	2.59853	IL24	1
CXCL10	0.0012557	Central memory CD4 T cell	1		Effector memeory CD8 T cell	-1.38925	IL25	-1
CXCL1	0.0005473	Central memory CD4 T cell	1		Immature B cell	4.97129	IL27	1
CCL8	0.00044662	Central memory CD4 T cell	1		Activated dendritic cell	2.20304	IL32	1
CCL5	0.00049451	Central memory CD4 T cell	1		Central memory CD8 T cell	1.19619	IL32	1
CCL28	0.00037028	Central memory CD4 T cell	1		Gamma delta T cell	1.07966	IL32	1
CCL18	0.00097797	Central memory CD4 T cell	1		Immature B cell	1.53012	IL32	1
CXCL5	0.0022654	Central memory CD8 T cell	1		Macrophage	1.07906	IL32	1
CXCL3	0.0014893	Central memory CD8 T cell	1		MDSC	2.89723	IL32	1
CXCL2	0.00075206	Central memory CD8 T cell	1		Immature dendritic cell	-1.15139	IL34	-1
CXCL14	0.00048178	Central memory CD8 T cell	1		Gamma delta T cell	0.697417	IL14	1
CXCL11	0.0016196	Central memory CD8 T cell	1
CXCL10	0.001683	Central memory CD8 T cell	1
CXCL1	0.00063717	Central memory CD8 T cell	1
CCL5	0.00069711	Central memory CD8 T cell	1
CCL28	0.00057641	Central memory CD8 T cell	1
CCL14	-0.0019232	Central memory CD8 T cell	-1
CCL2	0.000479	Effector memeory CD4 T cell	1
CCL16	-0.00247	Effector memeory CD8 T cell	-1
CCL19	0.0016662	Eosinophil	1
CCL15	0.0029652	Eosinophil	1
CXCL9	0.0016917	Gamma delta T cell	1
CXCL2	0.0014686	Gamma delta T cell	1
CXCL11	0.0024536	Gamma delta T cell	1
CXCL10	0.0028012	Gamma delta T cell	1
CXCL1	0.0011431	Gamma delta T cell	1
CCL5	0.00092153	Gamma delta T cell	1
CCL28	0.0007181	Gamma delta T cell	1
CCL16	-0.0028143	Gamma delta T cell	-1
CXCL3	0.00495241	Immature B cell	1
CCL20	0.00605196	Immature B cell	1
CCL19	0.00611774	Immature B cell	1
CCL17	0.00740679	Immature B cell	1
CCL15	0.00767153	Immature B cell	1
CXCL9	0.0013742	Immature dendritic cell	1
CXCL11	0.0016585	Immature dendritic cell	1
CXCL1	0.00090711	Immature dendritic cell	1
CCL8	0.00076404	Immature dendritic cell	1
CCL5	0.00072957	Immature dendritic cell	1
CXCL11	0.00233642	Macrophage	1
CXCL10	0.00256885	Macrophage	1
CCL5	0.00079209	Macrophage	1
CCL28	0.00089004	Macrophage	1
CCL14	-0.00354106	Macrophage	-1
CXCL5	0.00768724	MDSC	1
CXCL3	0.00517993	MDSC	1
CCL8	0.00192442	MDSC	1
CCL20	0.00640008	MDSC	1
CCL17	0.0059562	MDSC	1
CCL13	0.00747521	MDSC	1
CCL8	0.0012318	Memory B cell	1
CCL24	-0.0017938	Memory B cell	-1
CCL19	0.0013219	Memory B cell	1
CCL13	0.004389	Memory B cell	1
CCL24	-0.0019127	Monocyte	-1
CCL2	0.0010667	Monocyte	1
CCL18	0.0013465	Monocyte	1
CCL15	0.001838	Monocyte	1
CXCL9	0.0023321	Natural killer cell	1
CXCL16	0.0020358	Natural killer cell	1
CXCL11	0.0025614	Natural killer cell	1
CXCL10	0.0034337	Natural killer cell	1
CCL28	0.00081813	Natural killer cell	1
CCL18	0.002678	Natural killer cell	1
CCL14	-0.00181614	Natural killer T cell	1
CCL17	0.0030456	Neutrophil	1
XCL1	0.001883	Regulatory T cell	1
CCL19	0.0024025	Regulatory T cell	1
CCL18	0.0024272	Regulatory T cell	1
CCL15	0.0046281	Regulatory T cell	1
CCL18	0.0011309	Type 1 T helper cell	1
CCL15	0.001404	Type 1 T helper cell	1
PPBP	-0.00039346	Type 2 T helper cell	-1
CXCL9	0.000281	Type 2 T helper cell	1
CXCL14	0.00029318	Type 2 T helper cell	1
CXCL12	0.0002365	Type 2 T helper cell	1
CXCL1	0.00021723	Type 2 T helper cell	1
CCL2	0.00051554	Type 2 T helper cell	1
CXCL9	0.00091821	Type 17 T helper cell	1
CXCL11	0.00080216	Type 17 T helper cell	1

## Sheet: AG
Table S7-3-1 The results of correlation between chemokines and immune cells in AG by PLSR					Table S7-3-2 The results of correlation between immune cells and interleukins in AG by PLSR
Chemokine	Estimate	Immune Cell	Sign		Immune Cell	Estimate	Interleukin	Sign
CCL3	0.0046862	Activated B cell	1		Regulatory T cell	-4.09596	IL1A	-1
CCL23	-0.00563477	Activated B cell	-1		Activated CD4 T cell	8.11484	IL2	1
CCL22	0.0134403	Activated B cell	1		Central memory CD8 T cell	-2.99077	IL3	-1
CCL19	0.0150894	Activated B cell	1		Plasmacytoid dendritic cell	-1.87645	IL3	-1
CCL3	0.00321	Activated CD4 T cell	1		Regulatory T cell	-4.20412	IL3	-1
CCL22	0.00546	Activated CD4 T cell	1		T follicular helper cell	-1.19106	IL3	-1
CCL19	0.0061	Activated CD4 T cell	1		Central memory CD4 T cell	0.753794	IL6	1
CCL22	0.0031709	Activated CD8 T cell	1		Activated B cell	0.457884	IL7	1
CXCL14	0.00022196	Activated dendritic cell	1		Activated CD4 T cell	0.240302	IL7	1
CCL4	0.00096141	Activated dendritic cell	1		Activated CD8 T cell	0.131273	IL7	1
CCL3	0.00099633	Activated dendritic cell	1		CD56dim natural killer cell	-0.0355334	IL7	-1
CCL2	0.00057001	Activated dendritic cell	1		Effector memeory CD8 T cell	0.128866	IL7	1
CCL19	0.0017535	Activated dendritic cell	1		Immature B cell	0.450795	IL7	1
PF4	-0.0010233	CD56bright natural killer cell	-1		MDSC	0.239816	IL7	1
CXCL12	0.00044409	CD56bright natural killer cell	1		Memory B cell	0.141578	IL7	1
CCL21	0.0011662	CD56bright natural killer cell	1		Type 1 T helper cell	0.0682238	IL7	1
CCL2	0.00064793	CD56bright natural killer cell	1		Activated B cell	1.16128	IL12B	1
CCL11	0.00093856	CD56bright natural killer cell	1		Activated CD4 T cell	0.515895	IL12B	1
CCL1	-0.00090357	CD56bright natural killer cell	-1		Activated CD8 T cell	0.303422	IL12B	1
CXCL14	0.00035319	Central memory CD4 T cell	1		Effector memeory CD8 T cell	0.350094	IL12B	1
CCL4	0.00088705	Central memory CD4 T cell	1		Immature B cell	1.12554	IL12B	1
CCL26	-0.0006092	Central memory CD4 T cell	-1		MDSC	0.573351	IL12B	1
CCL21	0.0012138	Central memory CD4 T cell	1		Memory B cell	0.319407	IL12B	1
CCL2	0.00068038	Central memory CD4 T cell	1		Type 1 T helper cell	0.211994	IL12B	1
CCL19	0.001171	Central memory CD4 T cell	1		Central memory CD8 T cell	-1.67674	IL13	-1
CCL13	0.0012676	Central memory CD4 T cell	1		Immature dendritic cell	-1.14953	IL13	-1
PF4	-0.0035436	Central memory CD8 T cell	-1		Activated B cell	1.95135	IL16	1
CXCL9	0.0034204	Central memory CD8 T cell	1		Central memory CD8 T cell	-0.710961	IL16	-1
CXCL10	0.0047398	Central memory CD8 T cell	1		Immature B cell	1.55038	IL16	1
CCL2	0.0020178	Central memory CD8 T cell	1		MDSC	0.78335	IL16	1
CXCL3	0.00062129	Effector memeory CD4 T cell	1		Plasmacytoid dendritic cell	-0.421968	IL16	-1
CCL21	0.0011572	Effector memeory CD4 T cell	1		Activated B cell	2.16941	IL17A	1
CCL2	0.00064094	Effector memeory CD4 T cell	1		Activated CD4 T cell	0.869865	IL17A	1
CCL11	0.0011	Effector memeory CD4 T cell	1		Activated CD8 T cell	0.44532	IL17A	1
CXCL13	0.00533	Effector memeory CD8 T cell	1		Effector memeory CD8 T cell	0.486868	IL17A	1
CCL3	0.00188	Effector memeory CD8 T cell	1		Immature B cell	2.01271	IL17A	1
CCL22	0.00331	Effector memeory CD8 T cell	1		MDSC	0.994676	IL17A	1
CCL19	0.00401	Effector memeory CD8 T cell	1		Memory B cell	0.556146	IL17A	1
CCL18	0.00432	Effector memeory CD8 T cell	1		T follicular helper cell	0.211315	IL17A	1
CXCL9	0.0010535	Eosinophil	1		Type 1 T helper cell	0.296004	IL17A	1
CXCL16	0.00044121	Eosinophil	1		Activated B cell	-12.9975	IL19	-1
CCL8	0.0011613	Eosinophil	1		T follicular helper cell	-5.54914	IL19	-1
CCL4	0.0014175	Eosinophil	1		Activated B cell	3.49992	IL21	1
CCL19	0.0025174	Eosinophil	1		Activated CD4 T cell	1.55916	IL21	1
CCL18	0.001745	Eosinophil	1		Activated CD8 T cell	0.84	IL21	1
CCL13	0.0015202	Eosinophil	1		CD56dim natural killer cell	-0.177479	IL21	-1
CCL18	0.00382738	Gamma delta T cell	1		Central memory CD4 T cell	0.39222	IL21	1
CCL11	0.00209065	Gamma delta T cell	1		Effector memeory CD8 T cell	0.956258	IL21	1
CCL3	0.00513669	Immature B cell	1		Immature B cell	3.33342	IL21	1
CCL22	0.012422	Immature B cell	1		Macrophage	0.856507	IL21	1
CCL19	0.0142666	Immature B cell	1		MDSC	1.64031	IL21	1
XCL1	0.00119	Immature dendritic cell	1		Memory B cell	0.948961	IL21	1
CXCL9	0.0013	Immature dendritic cell	1		Monocyte	0.461467	IL21	1
CXCL14	0.000672	Immature dendritic cell	1		Natural killer cell	0.371998	IL21	1
CCL8	0.00146	Immature dendritic cell	1		Natural killer T cell	0.551644	IL21	1
CCL4	0.00157	Immature dendritic cell	1		Regulatory T cell	1.26813	IL21	1
CCL28	0.000516	Immature dendritic cell	1		T follicular helper cell	0.454255	IL21	1
CCL26	-0.000924	Immature dendritic cell	-1		Type 1 T helper cell	0.621059	IL21	1
CCL24	0.00112	Immature dendritic cell	1		Activated CD4 T cell	0.713816	IL24	1
CCL23	-0.000955	Immature dendritic cell	-1		Activated CD8 T cell	0.395833	IL24	1
CCL13	0.00148	Immature dendritic cell	1		Effector memeory CD8 T cell	0.492113	IL24	1
CXCL14	0.00048385	Macrophage	1		Macrophage	0.400137	IL24	1
CXCL13	0.00299577	Macrophage	1		Memory B cell	0.454944	IL24	1
CCL4	0.00147635	Macrophage	1		Monocyte	0.212416	IL24	1
CCL22	0.00192509	Macrophage	1		Activated CD4 T cell	4.0705	IL25	1
CCL21	0.00184594	Macrophage	1		Central memory CD8 T cell	-2.99077	IL31	-1
CCL2	0.00088233	Macrophage	1		Plasmacytoid dendritic cell	-1.87645	IL31	-1
CCL19	0.00261922	Macrophage	1		Regulatory T cell	-4.20412	IL31	-1
CCL13	0.00202916	Macrophage	1		T follicular helper cell	-1.19106	IL31	-1
CCL15	-0.0109	Mast cell	-1		Activated B cell	0.943816	IL32	1
CCL13	0.0042253	Mast cell	1		Activated CD4 T cell	0.560749	IL32	1
CCL1	-0.002942	Mast cell	-1		CD56dim natural killer cell	-0.080375	IL32	-1
CCL3	0.0029767	MDSC	1		Effector memeory CD8 T cell	0.335113	IL32	1
CCL22	0.0062304	MDSC	1		Immature B cell	0.959865	IL32	1
CCL19	0.0075255	MDSC	1		MDSC	0.523442	IL32	1
CCL22	0.00335078	Memory B cell	1		Memory B cell	0.308774	IL32	1
CCL19	0.00379954	Memory B cell	1		Monocyte	0.126855	IL32	1
CXCL13	0.0017306	Monocyte	1		Type 1 T helper cell	0.184679	IL32	1
CCL4	0.00061245	Monocyte	1		CD56bright natural killer cell	3.63658	IL33	1
CCL3	0.00064606	Monocyte	1		Effector memeory CD4 T cell	6.60491	IL33	1
CCL22	0.0010904	Monocyte	1		Neutrophil	-5.49318	IL34	-1
CCL19	0.0015204	Monocyte	1		Activated B cell	0.852206	IL14	1
CCL17	0.00081544	Monocyte	1		Activated CD4 T cell	-0.526514	IL14	-1
CXCL16	0.00031123	Natural killer cell	1		Immature B cell	0.384373	IL14	1
CXCL13	0.0015947	Natural killer cell	1
CXCL1	0.00061201	Natural killer cell	1
CCL26	-0.00046407	Natural killer cell	-1
CCL22	0.00099963	Natural killer cell	1
CCL2	0.00035224	Natural killer cell	1
CCL19	0.0012253	Natural killer cell	1
CCL18	0.0015735	Natural killer cell	1
CCL17	0.00057832	Natural killer cell	1
CCL13	0.0010544	Natural killer cell	1
CXCL9	0.0010352	Natural killer T cell	1
CXCL13	0.0029409	Natural killer T cell	1
CXCL1	0.0009583	Natural killer T cell	1
CCL23	-0.00103	Natural killer T cell	-1
CCL22	0.0016874	Natural killer T cell	1
CCL21	0.0013453	Natural killer T cell	1
CCL19	0.0018029	Natural killer T cell	1
CCL18	0.0024067	Natural killer T cell	1
CCL13	0.0016536	Natural killer T cell	1
CXCL9	0.0033098	Neutrophil	1
CXCL6	0.0044171	Neutrophil	1
CXCL11	0.0047057	Neutrophil	1
CXCL1	0.0029663	Neutrophil	1
CXCL12	0.0013041	Plasmacytoid dendritic cell	1
CCL2	0.0014035	Plasmacytoid dendritic cell	1
CCL11	0.002999	Plasmacytoid dendritic cell	1
PPBP	-0.0024547	Regulatory T cell	-1
CXCL9	0.0024182	Regulatory T cell	1
CXCL14	0.0010105	Regulatory T cell	1
CCL8	0.0025738	Regulatory T cell	1
CCL4	0.0024248	Regulatory T cell	1
CCL3	0.0015607	Regulatory T cell	1
CCL26	-0.001629	Regulatory T cell	-1
CCL23	-0.0021698	Regulatory T cell	-1
CCL21	0.0035469	Regulatory T cell	1
CCL2	0.0018343	Regulatory T cell	1
CCL19	0.0037707	Regulatory T cell	1
CCL18	0.0040811	Regulatory T cell	1
CCL13	0.003448	Regulatory T cell	1
CCL4	0.00054802	T follicular helper cell	1
CCL3	0.00035867	T follicular helper cell	1
CCL23	-0.00082059	T follicular helper cell	-1
CCL22	0.0011509	T follicular helper cell	1
CCL19	0.0013712	T follicular helper cell	1
CXCL16	0.00087191	Type 1 T helper cell	1
CXCL13	0.0049292	Type 1 T helper cell	1
CCL22	0.0026697	Type 1 T helper cell	1
CCL2	0.00098533	Type 2 T helper cell	1

## Sheet: EAG
Table S7-4-1 The results of correlation between chemokines and immune cells in EAG by PLSR					Table S7-4-2 The results of correlation between immune cells and interleukins in EAG by PLSR
Chemokine	Estimate	Immune Cell	Sign		Immune Cell	Estimate	Interleukin	Sign
CXCL14	0.00601	Activated B cell	1		Activated B cell	-9.66439	IL2	-1
CXCL13	0.0117	Activated B cell	1		Mast cell	-21.258	IL5	-1
CCL22	0.00872	Activated B cell	1		Effector memeory CD4 T cell	-9.80304	IL6	-1
CCL21	0.00749	Activated B cell	1		Gamma delta T cell	-6.78234	IL6	-1
CCL20	0.00597	Activated B cell	1		MDSC	-3.79978	IL7	-1
CCL19	0.0117	Activated B cell	1		Type 17 T helper cell	1.2345	IL7	1
CCL18	0.0114	Activated B cell	1		Natural killer cell	-5.99011	IL12A	-1
CXCL2	0.0017625	Activated CD4 T cell	1		Mast cell	-7.47586	IL15	-1
CXCL10	0.0046343	Activated CD4 T cell	1		Activated B cell	3.65653	IL16	1
CXCL1	0.0057856	Activated CD4 T cell	1		Eosinophil	1.7174	IL16	1
CCL5	0.0038754	Activated CD4 T cell	1		Gamma delta T cell	-0.831565	IL16	-1
CCL24	0.0058562	Activated CD4 T cell	1		Immature B cell	2.7223	IL16	1
CCL23	-0.0060609	Activated CD4 T cell	-1		Activated B cell	1.10172	IL17A	1
CCL21	0.0049745	Activated CD4 T cell	1		Mast cell	-10.1284	IL17D	-1
CCL20	0.0057415	Activated CD4 T cell	1		Eosinophil	3.53014	IL18	1
CCL19	0.005566	Activated CD4 T cell	1		MDSC	-3.14992	IL18	-1
CCL18	0.0042508	Activated CD4 T cell	1		Neutrophil	2.92756	IL18	1
CXCL9	0.0018582	Activated CD8 T cell	1		Neutrophil	4.11082	IL20	1
CXCL2	0.0010718	Activated CD8 T cell	1		Mast cell	-9.13199	IL21	-1
CXCL16	0.00061807	Activated CD8 T cell	1		Eosinophil	8.03521	IL22	1
CXCL14	0.00066799	Activated CD8 T cell	1		Regulatory T cell	-10.1327	IL22	-1
CXCL13	0.0020397	Activated CD8 T cell	1		Activated B cell	0.741995	IL23A	1
CXCL11	0.0022632	Activated CD8 T cell	1		Immature B cell	0.773736	IL23A	1
CXCL10	0.0025213	Activated CD8 T cell	1		Macrophage	0.296044	IL23A	1
CXCL1	0.0012135	Activated CD8 T cell	1		MDSC	0.60701	IL23A	1
CCL4	0.0012774	Activated CD8 T cell	1		Type 1 T helper cell	0.170847	IL23A	1
CCL22	0.0015776	Activated CD8 T cell	1		Neutrophil	4.11082	IL25	1
CCL21	0.0011838	Activated CD8 T cell	1		Effector memeory CD8 T cell	1.99173	IL26	1
CCL19	0.0021692	Activated CD8 T cell	1		Effector memeory CD4 T cell	-8.09256	IL27	-1
CCL18	0.0033097	Activated CD8 T cell	1		Gamma delta T cell	-4.41924	IL28	-1
CXCL2	0.0021119	Activated dendritic cell	1		Memory B cell	-4.70719	IL29	-1
CXCL11	0.0039284	Activated dendritic cell	1		CD56dim natural killer cell	4.68905	IL33	1
CCL24	0.0051925	Activated dendritic cell	1		Activated CD4 T cell	0.336522	IL34	1
CCL20	0.0027414	Activated dendritic cell	1
CXCL11	-0.0012437	CD56dim natural killer cell	-1
CCL2	0.0020474	Central memory CD4 T cell	1
CCL19	0.0021984	Central memory CD4 T cell	1
CXCL16	0.00085148	Central memory CD8 T cell	1
CCL20	0.0013419	Central memory CD8 T cell	1
CCL18	0.0029288	Central memory CD8 T cell	1
CXCL3	-0.0023191	Effector memeory CD4 T cell	-1
CXCL13	0.0026172	Effector memeory CD4 T cell	1
CX3CL1	-0.0023666	Effector memeory CD4 T cell	-1
CCL21	0.0024457	Effector memeory CD4 T cell	1
CCL19	0.0035844	Effector memeory CD4 T cell	1
CXCL9	0.00351792	Effector memeory CD8 T cell	1
CXCL2	0.00158819	Effector memeory CD8 T cell	1
CXCL16	0.00149314	Effector memeory CD8 T cell	1
CXCL13	0.00327922	Effector memeory CD8 T cell	1
CXCL11	0.00361159	Effector memeory CD8 T cell	1
CXCL10	0.00334163	Effector memeory CD8 T cell	1
CCL19	0.00235008	Effector memeory CD8 T cell	1
CCL18	0.00398486	Effector memeory CD8 T cell	1
CXCL16	0.0013986	Eosinophil	1
CXCL13	0.0033641	Eosinophil	1
CXCL10	0.0030326	Eosinophil	1
CCL8	0.0051278	Eosinophil	1
CXCL9	0.00096797	Gamma delta T cell	1
CXCL2	0.00075489	Gamma delta T cell	1
CXCL16	0.00054545	Gamma delta T cell	1
CXCL13	0.0018384	Gamma delta T cell	1
CXCL1	0.0013717	Gamma delta T cell	1
CCL4	0.00063981	Gamma delta T cell	1
CCL22	0.0013179	Gamma delta T cell	1
CCL21	0.0011647	Gamma delta T cell	1
CCL20	0.0017781	Gamma delta T cell	1
CCL18	0.0019234	Gamma delta T cell	1
CXCL14	0.0052609	Immature B cell	1
CXCL13	0.010968	Immature B cell	1
CXCL10	0.0080001	Immature B cell	1
CCL5	0.0056004	Immature B cell	1
CCL22	0.0077302	Immature B cell	1
CCL21	0.0077397	Immature B cell	1
CCL20	0.0068219	Immature B cell	1
CCL19	0.01181	Immature B cell	1
CCL18	0.011133	Immature B cell	1
CXCL9	0.0009237	Immature dendritic cell	1
CXCL2	0.00085332	Immature dendritic cell	1
CXCL16	0.00046248	Immature dendritic cell	1
CXCL14	0.00051783	Immature dendritic cell	1
CXCL13	0.0016475	Immature dendritic cell	1
CXCL1	0.0013232	Immature dendritic cell	1
CCL4	0.00061839	Immature dendritic cell	1
CCL22	0.001221	Immature dendritic cell	1
CCL21	0.00092552	Immature dendritic cell	1
CCL19	0.0016618	Immature dendritic cell	1
CCL18	0.0020446	Immature dendritic cell	1
XCL2	-0.00510085	Macrophage	-1
CXCL13	0.00199903	Macrophage	1
CXCL11	0.003354	Macrophage	1
CXCL10	0.00340676	Macrophage	1
CCL5	0.00271895	Macrophage	1
CCL20	0.00184618	Macrophage	1
CCL19	0.00299444	Macrophage	1
CXCL5	0.00696293	MDSC	1
CXCL2	0.00519707	MDSC	1
CXCL11	0.00872003	MDSC	1
CXCL10	0.00482848	MDSC	1
CCL22	0.0033152	MDSC	1
CCL20	0.0049732	MDSC	1
CCL19	0.00478034	MDSC	1
CXCL9	0.0017312	Memory B cell	1
CXCL13	0.0030593	Memory B cell	1
CXCL10	0.0035177	Memory B cell	1
CXCL1	0.0019694	Memory B cell	1
CCL5	0.0021199	Memory B cell	1
CCL21	0.0025263	Memory B cell	1
CCL20	0.001791	Memory B cell	1
CCL19	0.0039527	Memory B cell	1
CCL18	0.0044755	Memory B cell	1
CXCL9	0.000782	Monocyte	1
CXCL2	0.000571	Monocyte	1
CXCL14	0.00028	Monocyte	1
CXCL1	0.000836	Monocyte	1
CCL4	0.000467	Monocyte	1
CCL22	0.000776	Monocyte	1
CCL20	0.000835	Monocyte	1
CXCL9	0.001046	Natural killer cell	1
CXCL2	0.00084308	Natural killer cell	1
CXCL16	0.00051024	Natural killer cell	1
CXCL13	0.00161	Natural killer cell	1
CXCL11	0.0016277	Natural killer cell	1
CXCL10	0.0016737	Natural killer cell	1
CXCL1	0.0011896	Natural killer cell	1
CCL4	0.00071388	Natural killer cell	1
CCL22	0.0010819	Natural killer cell	1
CCL19	0.0014606	Natural killer cell	1
CCL18	0.0019926	Natural killer cell	1
CXCL9	0.0017633	Natural killer T cell	1
CXCL16	0.00087797	Natural killer T cell	1
CXCL13	0.002269	Natural killer T cell	1
CXCL11	0.002385	Natural killer T cell	1
CXCL10	0.0020224	Natural killer T cell	1
CCL5	0.001223	Natural killer T cell	1
CCL20	0.0014994	Natural killer T cell	1
CXCL5	0.0072878	Neutrophil	1
CXCL1	0.0042826	Neutrophil	1
CCL25	0.011382	Neutrophil	1
CCL24	0.0074784	Neutrophil	1
CCL20	0.0073212	Neutrophil	1
XCL1	0.00042229	Plasmacytoid dendritic cell	1
CXCL5	0.00048305	Plasmacytoid dendritic cell	1
CXCL3	0.00051867	Plasmacytoid dendritic cell	1
CXCL1	0.00044675	Plasmacytoid dendritic cell	1
CCL25	-0.001357	Plasmacytoid dendritic cell	-1
CCL18	0.0013386	Plasmacytoid dendritic cell	1
CXCL9	0.0026928	Regulatory T cell	1
CXCL2	0.0021209	Regulatory T cell	1
CXCL16	0.0013344	Regulatory T cell	1
CXCL14	0.0014124	Regulatory T cell	1
CXCL13	0.0045369	Regulatory T cell	1
CXCL1	0.0033081	Regulatory T cell	1
CCL4	0.0018037	Regulatory T cell	1
CCL22	0.0032283	Regulatory T cell	1
CCL21	0.0026522	Regulatory T cell	1
CCL19	0.0043523	Regulatory T cell	1
CCL18	0.0057528	Regulatory T cell	1
CXCL9	0.00094547	T follicular helper cell	1
CXCL2	0.0006568	T follicular helper cell	1
CXCL14	0.00038019	T follicular helper cell	1
CXCL1	0.00081041	T follicular helper cell	1
CCL4	0.00058914	T follicular helper cell	1
CCL22	0.00094384	T follicular helper cell	1
CCL18	0.0020525	T follicular helper cell	1
CXCL2	0.0007896	Type 1 T helper cell	1
CXCL16	0.00051538	Type 1 T helper cell	1
CXCL13	0.0013298	Type 1 T helper cell	1
CXCL12	0.00038372	Type 1 T helper cell	1
CXCL11	0.0020723	Type 1 T helper cell	1
CXCL10	0.0020659	Type 1 T helper cell	1
CCL5	0.0011323	Type 1 T helper cell	1
CCL22	0.00080791	Type 1 T helper cell	1
CCL20	0.0008945	Type 1 T helper cell	1
CCL2	0.0012507	Type 1 T helper cell	1
CCL19	0.0015896	Type 1 T helper cell	1
CCL18	0.0018358	Type 1 T helper cell	1
CXCL5	0.0018658	Type 2 T helper cell	1
CXCL1	0.0011523	Type 2 T helper cell	1
CCL28	0.00075961	Type 2 T helper cell	1
CCL25	0.0019862	Type 2 T helper cell	1
CCL24	0.0016503	Type 2 T helper cell	1
CCL20	0.00171	Type 2 T helper cell	1
CCL15	0.0012356	Type 2 T helper cell	1
CXCL9	0.00062383	Type 17 T helper cell	1
CXCL11	0.00058437	Type 17 T helper cell	1
CXCL10	0.00077086	Type 17 T helper cell	1
CCL5	0.0003091	Type 17 T helper cell	1
CCL4	0.00037462	Type 17 T helper cell	1
CCL22	0.00057804	Type 17 T helper cell	1
CCL2	0.00027929	Type 17 T helper cell	1
CCL19	0.00070411	Type 17 T helper cell	1
CCL18	0.0012602	Type 17 T helper cell	1

## Sheet: T12
Table S7-5-1 The results of correlation between chemokines and immune cells in T1/2 by PLSR					Table S7-5-2 The results of correlation between immune cells and interleukins in T1/2 by PLSR
Chemokine	Estimate	Immune Cell	Sign		Immune Cell	Estimate	Interleukin	Sign
CXCL5	-0.00269	Activated B cell	-1		Activated B cell	-1.33195	IL1A	-1
CXCL11	-0.000775	Activated B cell	-1		Eosinophil	4.29655	IL1A	1
CCL28	-0.00235	Activated B cell	-1		Natural killer T cell	-1.57966	IL1A	-1
CCL23	0.00272	Activated B cell	1		Plasmacytoid dendritic cell	-2.64429	IL1A	-1
CCL21	0.00349	Activated B cell	1		CD56dim natural killer cell	4.30735	IL2	1
CCL20	0.00225	Activated B cell	1		Monocyte	3.71781	IL2	1
CCL2	0.00306	Activated B cell	1		Activated B cell	0.74636	IL3	1
XCL2	0.0071257	Activated CD4 T cell	1		Effector memeory CD4 T cell	0.78698	IL3	1
PF4	-0.0070679	Activated CD4 T cell	-1		Eosinophil	-2.00984	IL3	-1
CXCL14	-0.0066609	Activated CD4 T cell	-1		Gamma delta T cell	1.76555	IL3	1
CCL4	0.0076947	Activated CD4 T cell	1		Immature B cell	1.41098	IL3	1
CCL23	0.0077255	Activated CD4 T cell	1		Natural killer cell	1.08597	IL3	1
CCL20	0.0069193	Activated CD4 T cell	1		Plasmacytoid dendritic cell	2.04208	IL3	1
CCL19	-0.0099963	Activated CD4 T cell	-1		CD56dim natural killer cell	1.88832	IL4	1
CCL17	-0.0061264	Activated CD4 T cell	-1		Macrophage	1.15443	IL4	1
PPBP	-0.0043401	Activated CD8 T cell	-1		MDSC	1.13105	IL4	1
XCL2	0.0053318	Activated dendritic cell	1		Memory B cell	-2.00958	IL4	-1
CCL20	0.0049161	Activated dendritic cell	1		Regulatory T cell	-1.73299	IL4	-1
CCL19	-0.0037811	Activated dendritic cell	-1		Type 2 T helper cell	0.557538	IL4	1
PPBP	-0.0037297	CD56bright natural killer cell	-1		Activated B cell	8.64042	IL5	1
CXCL9	0.0011068	CD56bright natural killer cell	1		Macrophage	5.03611	IL5	1
CCL14	0.0013387	CD56bright natural killer cell	1		Monocyte	-6.14085	IL5	-1
CCL28	0.0018368	Central memory CD4 T cell	1		Plasmacytoid dendritic cell	-11.0337	IL5	-1
CCL21	0.0014894	Central memory CD4 T cell	1		Type 2 T helper cell	-5.72331	IL5	-1
CCL19	0.0015153	Central memory CD4 T cell	1		Activated CD4 T cell	9.0364	IL6	1
CCL18	0.0019723	Central memory CD4 T cell	1		Central memory CD8 T cell	-11.9774	IL6	-1
CCL15	0.0025351	Central memory CD4 T cell	1		Gamma delta T cell	8.91013	IL6	1
CCL8	0.00078894	Central memory CD8 T cell	1		Type 17 T helper cell	-6.68611	IL6	-1
CCL21	-0.001803	Central memory CD8 T cell	-1		Activated dendritic cell	-0.606889	IL7	-1
CCL15	-0.0021532	Central memory CD8 T cell	-1		CD56bright natural killer cell	0.703857	IL7	1
CCL5	-0.012328	Effector memeory CD4 T cell	-1		CD56dim natural killer cell	1.53657	IL7	1
CCL22	0.0054528	Effector memeory CD4 T cell	1		Immature B cell	0.814696	IL7	1
CCL21	-0.0057372	Effector memeory CD4 T cell	-1		Macrophage	1.14059	IL7	1
CCL2	0.0065405	Effector memeory CD4 T cell	1		MDSC	1.08263	IL7	1
CCL15	0.0035782	Effector memeory CD4 T cell	1		Memory B cell	-1.34339	IL7	-1
XCL1	-0.00049726	Effector memeory CD8 T cell	-1		Natural killer T cell	0.670388	IL7	1
PF4	0.0010093	Effector memeory CD8 T cell	1		Neutrophil	0.598851	IL7	1
CXCL13	0.0010822	Effector memeory CD8 T cell	1		Type 2 T helper cell	0.658513	IL7	1
XCL2	0.0062871	Eosinophil	1		Activated B cell	10.5444	IL11	1
CXCL11	0.0040145	Eosinophil	1		Activated CD8 T cell	-10.9625	IL11	-1
CX3CL1	0.0034489	Eosinophil	1		Central memory CD4 T cell	-11.5035	IL11	-1
CCL8	0.0043837	Eosinophil	1		Effector memeory CD8 T cell	-10.528	IL11	-1
CCL5	0.0044197	Eosinophil	1		Gamma delta T cell	15.3151	IL11	1
CCL4	-0.0033792	Eosinophil	-1		Immature dendritic cell	-9.65452	IL11	-1
CCL3	0.0048256	Eosinophil	1		MDSC	-10.4422	IL11	-1
CCL23	-0.0033643	Eosinophil	-1		Natural killer T cell	14.6307	IL11	1
CCL13	-0.0043944	Eosinophil	-1		Eosinophil	-4.15534	IL12A	-1
CXCL13	0.0011585	Gamma delta T cell	1		Gamma delta T cell	3.1299	IL12A	1
CX3CL1	-0.001532	Gamma delta T cell	-1		Immature dendritic cell	2.02973	IL12A	1
CCL26	0.002701	Gamma delta T cell	1		Memory B cell	3.22326	IL12A	1
CCL21	0.0024572	Gamma delta T cell	1		Natural killer cell	3.35384	IL12A	1
CCL2	0.0020018	Gamma delta T cell	1		Plasmacytoid dendritic cell	5.21669	IL12A	1
CCL18	0.0026916	Gamma delta T cell	1		Type 17 T helper cell	2.97028	IL12A	1
CCL16	0.0015164	Gamma delta T cell	1		Activated dendritic cell	1.56544	IL12B	1
CCL22	0.0024476	Immature B cell	1		CD56dim natural killer cell	-2.13538	IL12B	-1
CCL19	0.0026883	Immature B cell	1		Gamma delta T cell	1.94283	IL12B	1
PPBP	-0.0027729	Immature dendritic cell	-1		Macrophage	-2.4333	IL12B	-1
CCL8	-0.0012139	Immature dendritic cell	-1		MDSC	-2.29166	IL12B	-1
CCL4	0.0007182	Immature dendritic cell	1		Memory B cell	5.09047	IL12B	1
CCL18	0.0028055	Immature dendritic cell	1		Natural killer cell	1.61168	IL12B	1
CXCL2	-0.00093023	Macrophage	-1		Natural killer T cell	-2.78906	IL12B	-1
CXCL13	-0.0013365	Macrophage	-1		Type 17 T helper cell	1.75854	IL12B	1
CCL3	-0.0027821	Macrophage	-1		Type 2 T helper cell	-1.06355	IL12B	-1
CCL21	-0.0019599	Macrophage	-1		Activated B cell	2.75765	IL13	1
CCL17	0.0035553	Macrophage	1		Central memory CD4 T cell	6.03754	IL13	1
CXCL3	0.00838525	MDSC	1		Effector memeory CD8 T cell	3.13973	IL13	1
CCL22	0.0073504	MDSC	1		Memory B cell	11.1351	IL13	1
CCL17	0.00498085	MDSC	1		Natural killer cell	4.04562	IL13	1
XCL2	0.0037038	Memory B cell	1		Natural killer T cell	-6.79217	IL13	-1
XCL1	-0.00098413	Memory B cell	-1		Plasmacytoid dendritic cell	6.41686	IL13	1
PF4	0.0021591	Memory B cell	1		Type 17 T helper cell	4.68628	IL13	1
CXCL2	0.00091723	Memory B cell	1		Activated CD4 T cell	11.1685	IL15	1
CXCL13	0.002511	Memory B cell	1		Regulatory T cell	9.51882	IL15	1
CXCL10	-0.0020094	Memory B cell	-1		Eosinophil	1.62093	IL16	1
CX3CL1	-0.0015948	Memory B cell	-1		Memory B cell	-1.67859	IL16	-1
CCL3	0.002138	Memory B cell	1		Natural killer cell	-1.14404	IL16	-1
CCL26	0.0026619	Memory B cell	1		Plasmacytoid dendritic cell	-1.88227	IL16	-1
CCL21	0.0054876	Memory B cell	1		Regulatory T cell	-1.80441	IL16	-1
CCL2	0.0044119	Memory B cell	1		Type 17 T helper cell	-0.738312	IL16	-1
CCL18	0.0037646	Memory B cell	1		Plasmacytoid dendritic cell	11.3537	IL17A	1
CCL15	0.0030569	Memory B cell	1		Type 17 T helper cell	9.20021	IL17A	1
XCL1	-0.00086699	Natural killer cell	-1		CD56dim natural killer cell	3.55644	IL17B	1
CXCL11	-0.00082003	Natural killer cell	-1		Macrophage	1.69118	IL17B	1
CX3CL1	-0.0012491	Natural killer cell	-1		MDSC	2.61237	IL17B	1
CCL8	-0.00072282	Natural killer cell	-1		Memory B cell	-5.03584	IL17B	-1
CCL4	0.0006158	Natural killer cell	1		Natural killer T cell	3.25144	IL17B	1
CCL26	0.0016847	Natural killer cell	1		Eosinophil	-3.17698	IL17C	-1
CCL23	-0.0016467	Natural killer cell	-1		Gamma delta T cell	1.2837	IL17C	1
CCL22	-0.0019459	Natural killer cell	-1		Mast cell	1.72527	IL17C	1
CCL21	0.0014876	Natural killer cell	1		Natural killer cell	1.1011	IL17C	1
CCL18	0.0029421	Natural killer cell	1		Plasmacytoid dendritic cell	1.66919	IL17C	1
CCL15	0.0022447	Natural killer cell	1		Regulatory T cell	2.06306	IL17C	1
CCL14	0.00088192	Natural killer cell	1		Activated dendritic cell	-1.32099	IL17D	-1
XCL2	-0.0024108	Natural killer T cell	-1		CD56dim natural killer cell	2.1244	IL17D	1
XCL1	0.0007216	Natural killer T cell	1		Eosinophil	-2.10597	IL17D	-1
PF4	-0.0010135	Natural killer T cell	-1		Macrophage	2.14117	IL17D	1
CXCL13	-0.0014383	Natural killer T cell	-1		MDSC	1.4644	IL17D	1
CXCL10	0.00094559	Natural killer T cell	1		Memory B cell	-2.09785	IL17D	-1
CCL3	-0.0016066	Natural killer T cell	-1		Natural killer cell	1.34345	IL17D	1
CCL28	-0.0012317	Natural killer T cell	-1		Type 2 T helper cell	1.17391	IL17D	1
CCL26	-0.0010702	Natural killer T cell	-1		Effector memeory CD4 T cell	3.21939	IL17F	1
CCL23	0.0014121	Natural killer T cell	1		Memory B cell	6.26872	IL17F	1
CCL22	0.0015947	Natural killer T cell	1		Natural killer cell	4.65105	IL17F	1
CCL21	-0.0020986	Natural killer T cell	-1		Natural killer T cell	-3.56182	IL17F	-1
CCL2	-0.0011305	Natural killer T cell	-1		Plasmacytoid dendritic cell	6.63784	IL17F	1
CCL18	-0.0021594	Natural killer T cell	-1		Type 17 T helper cell	4.35374	IL17F	1
CCL16	-0.0006487	Natural killer T cell	-1		CD56dim natural killer cell	2.16673	IL18	1
CCL15	-0.0022967	Natural killer T cell	-1		Effector memeory CD4 T cell	0.87739	IL18	1
CCL21	-0.0017295	Neutrophil	-1		Eosinophil	-3.0242	IL18	-1
CCL15	-0.0018968	Neutrophil	-1		Immature dendritic cell	0.84227	IL18	1
XCL1	-0.0013075	Plasmacytoid dendritic cell	-1		Macrophage	1.40916	IL18	1
PF4	0.0012092	Plasmacytoid dendritic cell	1		Regulatory T cell	2.21473	IL18	1
CXCL11	-0.0013448	Plasmacytoid dendritic cell	-1		Activated CD4 T cell	4.44073	IL19	1
CX3CL1	-0.0012932	Plasmacytoid dendritic cell	-1		Central memory CD8 T cell	4.93036	IL19	1
CCL26	0.0018438	Plasmacytoid dendritic cell	1		Activated CD4 T cell	3.28752	IL20	1
CCL21	0.0018563	Plasmacytoid dendritic cell	1		Eosinophil	-4.64186	IL20	-1
CCL18	0.0041351	Plasmacytoid dendritic cell	1		Type 2 T helper cell	-2.25632	IL20	-1
CCL15	0.0024185	Plasmacytoid dendritic cell	1		Eosinophil	-1.94387	IL21	-1
CCL13	0.0011874	Plasmacytoid dendritic cell	1		Immature B cell	1.53525	IL21	1
CXCL13	-0.0054128	Regulatory T cell	-1		Macrophage	1.39904	IL21	1
CXCL11	-0.0059154	Regulatory T cell	-1		Natural killer T cell	0.935253	IL21	1
CCL8	-0.0054843	Regulatory T cell	-1		Regulatory T cell	1.49855	IL21	1
CCL5	-0.0057266	Regulatory T cell	-1		T follicular helper cell	-0.830688	IL21	-1
PPBP	-0.0023709	T follicular helper cell	-1		CD56dim natural killer cell	1.51869	IL22	1
CXCL13	0.0022807	T follicular helper cell	1		Effector memeory CD4 T cell	1.06523	IL22	1
CXCL11	0.0021727	T follicular helper cell	1		Eosinophil	-2.99806	IL22	-1
CCL17	0.0028472	T follicular helper cell	1		Natural killer T cell	1.27494	IL22	1
XCL2	0.0022297	Type 1 T helper cell	1		Memory B cell	3.45498	IL23A	1
CXCL5	-0.0031985	Type 1 T helper cell	-1		Natural killer cell	2.99588	IL23A	1
CXCL5	0.0022561	Type 2 T helper cell	1		Natural killer T cell	-3.59762	IL23A	-1
CXCL13	-0.0010805	Type 2 T helper cell	-1		Plasmacytoid dendritic cell	3.12041	IL23A	1
CX3CL1	0.00065539	Type 2 T helper cell	1		Type 17 T helper cell	2.65685	IL23A	1
CCL3	-0.00091868	Type 2 T helper cell	-1		CD56dim natural killer cell	-2.57488	IL24	-1
CCL21	-0.0024001	Type 2 T helper cell	-1		Central memory CD4 T cell	2.52662	IL24	1
CCL2	-0.0023368	Type 2 T helper cell	-1		Central memory CD8 T cell	3.5062	IL24	1
XCL1	-0.00037202	Type 17 T helper cell	-1		Type 17 T helper cell	-1.56907	IL24	-1
PF4	0.0010119	Type 17 T helper cell	1		Type 2 T helper cell	1.52694	IL24	1
CXCL3	0.00054715	Type 17 T helper cell	1		Immature dendritic cell	2.9709	IL25	1
CXCL13	0.0010592	Type 17 T helper cell	1		Natural killer cell	4.6173	IL25	1
CCL3	0.00080278	Type 17 T helper cell	1		CD56bright natural killer cell	1.36889	IL26	1
CCL26	0.00077941	Type 17 T helper cell	1		CD56dim natural killer cell	2.59996	IL26	1
CCL21	0.0018079	Type 17 T helper cell	1		Effector memeory CD8 T cell	1.02293	IL26	1
CCL2	0.001559	Type 17 T helper cell	1		Eosinophil	1.45127	IL26	1
CCL18	0.0028102	Type 17 T helper cell	1		Macrophage	1.12383	IL26	1
CCL15	0.001746	Type 17 T helper cell	1		MDSC	1.3137	IL26	1
					Memory B cell	-2.00948	IL26	-1
					Type 2 T helper cell	1.25023	IL26	1
					Mast cell	1.52669	IL27	1
					Eosinophil	-1.5687	IL27	-1
					Effector memeory CD4 T cell	1.55137	IL31	1
					Effector memeory CD8 T cell	1.82634	IL31	1
					Eosinophil	-4.43287	IL31	-1
					Gamma delta T cell	2.09538	IL31	1
					Immature B cell	1.85808	IL31	1
					Immature dendritic cell	2.30859	IL31	1
					Memory B cell	2.54343	IL31	1
					Natural killer cell	2.42775	IL31	1
					Plasmacytoid dendritic cell	4.23435	IL31	1
					Regulatory T cell	2.66338	IL31	1
					Type 17 T helper cell	2.30791	IL31	1
					Activated B cell	-1.36428	IL32	-1
					MDSC	2.14328	IL32	1
					Memory B cell	-5.93928	IL32	-1
					Natural killer cell	-2.75681	IL32	-1
					Natural killer T cell	3.06207	IL32	1
					Plasmacytoid dendritic cell	-3.96458	IL32	-1
					Type 17 T helper cell	-2.11749	IL32	-1
					Activated B cell	-2.20846	IL33	-1
					CD56dim natural killer cell	4.7659	IL33	1
					Macrophage	2.36217	IL33	1
					MDSC	3.57475	IL33	1
					Memory B cell	-5.47928	IL33	-1
					Neutrophil	1.81181	IL33	1
					Type 2 T helper cell	2.09786	IL33	1
					Activated CD8 T cell	1.32873	IL34	1
					CD56bright natural killer cell	1.57161	IL34	1
					CD56dim natural killer cell	3.41659	IL34	1
					Immature dendritic cell	1.14249	IL34	1
					Macrophage	1.45617	IL34	1
					MDSC	2.09168	IL34	1
					Memory B cell	-2.27386	IL34	-1
					Natural killer T cell	1.27415	IL34	1
					Type 2 T helper cell	1.30605	IL34	1
					Activated dendritic cell	2.29909	IL14	1
					Central memory CD8 T cell	-4.61271	IL14	-1
					Gamma delta T cell	4.36265	IL14	1
					MDSC	-5.37464	IL14	-1
					Memory B cell	5.58789	IL14	1
					Regulatory T cell	5.31432	IL14	1

## Sheet: T34
Table S7-6-1 The results of correlation between chemokines and immune cells in T3/4 by PLSR					Table S7-6-2 The results of correlation between immune cells and interleukins in T3/4 by PLSR
Chemokine	Estimate	Immune Cell	Sign		Immune Cell	Estimate	Interleukin	Sign
CCL28	-0.0036892	Activated B cell	-1		Central memory CD4 T cell	4.8346	IL1A	1
CCL21	0.0081983	Activated B cell	1		Eosinophil	6.26179	IL1A	1
CCL17	-0.0023134	Activated B cell	-1		Immature B cell	4.60882	IL1A	1
CXCL1	0.001543	Activated CD4 T cell	1		Plasmacytoid dendritic cell	-7.08149	IL1A	-1
CCL4	0.00052344	Activated CD4 T cell	1		T follicular helper cell	4.93091	IL1A	1
CCL15	0.0016466	Activated CD4 T cell	1		Type 17 T helper cell	-4.78241	IL1A	-1
PPBP	-0.0021335	Activated CD8 T cell	-1		Activated CD8 T cell	0.582591	IL1B	1
CXCL5	0.002487	Activated CD8 T cell	1		CD56dim natural killer cell	1.76031	IL1B	1
CXCL2	-0.00081467	Activated CD8 T cell	-1		Effector memeory CD8 T cell	1.0581	IL1B	1
CXCL14	0.0019419	Activated CD8 T cell	1		Gamma delta T cell	-0.576403	IL1B	-1
CXCL13	-0.0010444	Activated CD8 T cell	-1		Immature dendritic cell	0.521686	IL1B	1
CCL4	0.00059115	Activated CD8 T cell	1		Macrophage	0.8127	IL1B	1
CCL3	-0.0017076	Activated CD8 T cell	-1		Mast cell	-0.927466	IL1B	-1
CCL28	0.0046451	Activated CD8 T cell	1		Regulatory T cell	0.593443	IL1B	1
CCL24	0.0019311	Activated CD8 T cell	1		Type 2 T helper cell	0.587988	IL1B	1
CCL21	-0.0025139	Activated CD8 T cell	-1		Activated CD8 T cell	1.08871	IL2	1
CCL20	-0.0028982	Activated CD8 T cell	-1		Activated dendritic cell	0.984262	IL2	1
CCL2	-0.0019154	Activated CD8 T cell	-1		CD56bright natural killer cell	2.04863	IL2	1
CCL14	0.00085932	Activated CD8 T cell	1		CD56dim natural killer cell	2.59092	IL2	1
CCL13	0.0008777	Activated CD8 T cell	1		Effector memeory CD4 T cell	1.05831	IL2	1
CCL1	0.00068363	Activated CD8 T cell	1		Eosinophil	-1.57668	IL2	-1
XCL1	-0.0055086	Activated dendritic cell	-1		Mast cell	-1.66492	IL2	-1
CCL3	0.0091654	Activated dendritic cell	1		Natural killer cell	2.28546	IL2	1
CCL13	-0.0079357	Activated dendritic cell	-1		T follicular helper cell	-1.3208	IL2	-1
CCL1	-0.0060482	Activated dendritic cell	-1		Effector memeory CD4 T cell	2.42211	IL3	1
PPBP	-0.0038454	CD56bright natural killer cell	-1		Eosinophil	-1.81602	IL3	-1
PF4	-0.0023601	CD56bright natural killer cell	-1		Immature B cell	2.74131	IL3	1
CXCL2	-0.0015161	CD56bright natural killer cell	-1		Mast cell	-4.34372	IL3	-1
CXCL13	-0.002133	CD56bright natural killer cell	-1		Natural killer cell	2.68206	IL3	1
CCL2	-0.0023502	CD56bright natural killer cell	-1		Natural killer T cell	1.37435	IL3	1
CCL15	0.0026531	CD56bright natural killer cell	1		Plasmacytoid dendritic cell	3.86397	IL3	1
CCL14	0.001925	CD56bright natural killer cell	1		Regulatory T cell	4.06299	IL3	1
CCL13	0.0015559	CD56bright natural killer cell	1		Type 2 T helper cell	2.09123	IL3	1
CCL1	0.00069455	CD56bright natural killer cell	1		Activated CD8 T cell	0.700727	IL4	1
PPBP	-0.0052035	CD56dim natural killer cell	-1		Activated dendritic cell	-0.578689	IL4	-1
CXCL2	-0.024845	CD56dim natural killer cell	-1		CD56bright natural killer cell	0.676409	IL4	1
CCL8	-0.014389	CD56dim natural killer cell	-1		CD56dim natural killer cell	1.39594	IL4	1
CCL5	0.0229	CD56dim natural killer cell	1		Central memory CD8 T cell	0.589091	IL4	1
CCL3	-0.012154	CD56dim natural killer cell	-1		Effector memeory CD8 T cell	0.790766	IL4	1
CCL25	-0.017955	CD56dim natural killer cell	-1		Gamma delta T cell	-0.525291	IL4	-1
CCL22	-0.0068722	CD56dim natural killer cell	-1		Macrophage	0.832102	IL4	1
CCL18	0.0067764	CD56dim natural killer cell	1		Mast cell	-0.827926	IL4	-1
CCL1	0.03264	CD56dim natural killer cell	1		MDSC	0.484789	IL4	1
XCL2	0.0041285	Central memory CD4 T cell	1		Memory B cell	-0.763989	IL4	-1
CXCL6	0.0041449	Central memory CD4 T cell	1		Type 17 T helper cell	-0.496114	IL4	-1
CXCL11	0.0043122	Central memory CD4 T cell	1		Type 2 T helper cell	0.722863	IL4	1
CCL8	0.0044147	Central memory CD4 T cell	1		Activated CD8 T cell	-2.65422	IL5	-1
CCL21	0.0057824	Central memory CD4 T cell	1		Effector memeory CD8 T cell	5.52623	IL5	1
CCL13	-0.004113	Central memory CD4 T cell	-1		Macrophage	5.76791	IL5	1
XCL2	-0.0014248	Central memory CD8 T cell	-1		Natural killer cell	-4.9885	IL5	-1
XCL1	0.00059866	Central memory CD8 T cell	1		Natural killer T cell	4.01979	IL5	1
PPBP	-0.0020871	Central memory CD8 T cell	-1		Type 17 T helper cell	-4.33441	IL5	-1
CXCL5	0.0015041	Central memory CD8 T cell	1		Type 2 T helper cell	3.58947	IL5	1
CXCL3	0.00024864	Central memory CD8 T cell	1		Gamma delta T cell	6.23237	IL6	1
CXCL2	-0.00025925	Central memory CD8 T cell	-1		Immature dendritic cell	3.33661	IL6	1
CXCL12	0.00052126	Central memory CD8 T cell	1		Macrophage	3.48099	IL6	1
CXCL11	0.00063804	Central memory CD8 T cell	1		Memory B cell	-3.99862	IL6	-1
CXCL10	0.00085793	Central memory CD8 T cell	1		Monocyte	-7.27598	IL6	-1
CX3CL1	0.00047668	Central memory CD8 T cell	1		Natural killer T cell	2.44252	IL6	1
CCL8	0.00050012	Central memory CD8 T cell	1		Neutrophil	-5.36965	IL6	-1
CCL5	0.00036738	Central memory CD8 T cell	1		Activated CD4 T cell	1.02205	IL7	1
CCL3	-0.00056505	Central memory CD8 T cell	-1		Activated CD8 T cell	0.80992	IL7	1
CCL21	-0.0016998	Central memory CD8 T cell	-1		CD56dim natural killer cell	2.4385	IL7	1
CCL20	-0.0016821	Central memory CD8 T cell	-1		Gamma delta T cell	-1.18751	IL7	-1
CCL2	-0.0011254	Central memory CD8 T cell	-1		Macrophage	1.21317	IL7	1
CCL19	-0.00066116	Central memory CD8 T cell	-1		Mast cell	-1.7552	IL7	-1
CCL18	-0.0012772	Central memory CD8 T cell	-1		MDSC	1.41801	IL7	1
CCL15	-0.00094581	Central memory CD8 T cell	-1		Memory B cell	-1.21795	IL7	-1
CCL1	0.00029559	Central memory CD8 T cell	1		Natural killer cell	0.97724	IL7	1
XCL2	-0.0040773	Effector memeory CD4 T cell	-1		Monocyte	-16.1354	IL10	-1
PF4	0.006395	Effector memeory CD4 T cell	1		Natural killer cell	8.3891	IL10	1
CX3CL1	0.0063971	Effector memeory CD4 T cell	1		Activated B cell	6.35083	IL11	1
CCL8	-0.0087364	Effector memeory CD4 T cell	-1		Activated CD8 T cell	-9.36061	IL11	-1
CCL5	-0.013796	Effector memeory CD4 T cell	-1		CD56dim natural killer cell	-8.30571	IL11	-1
CCL3	0.0077012	Effector memeory CD4 T cell	1		Immature dendritic cell	-9.61878	IL11	-1
CCL25	0.011898	Effector memeory CD4 T cell	1		MDSC	-7.99244	IL11	-1
XCL2	0.0032813	Effector memeory CD8 T cell	1		Natural killer cell	-7.93004	IL11	-1
CXCL5	0.0054662	Effector memeory CD8 T cell	1		Natural killer T cell	12.5679	IL11	1
CXCL2	-0.0025994	Effector memeory CD8 T cell	-1		Regulatory T cell	12.0905	IL11	1
CXCL11	0.0024329	Effector memeory CD8 T cell	1		Activated CD4 T cell	3.42431	IL12A	1
CCL8	0.001969	Effector memeory CD8 T cell	1		Activated CD8 T cell	3.05875	IL12A	1
CCL4	0.0016276	Effector memeory CD8 T cell	1		Effector memeory CD4 T cell	4.60904	IL12A	1
CCL28	0.004552	Effector memeory CD8 T cell	1		Effector memeory CD8 T cell	-5.24906	IL12A	-1
CCL26	-0.0035975	Effector memeory CD8 T cell	-1		Eosinophil	-3.70837	IL12A	-1
CCL25	-0.0021658	Effector memeory CD8 T cell	-1		Immature B cell	-3.34957	IL12A	-1
CCL15	0.0037125	Effector memeory CD8 T cell	1		Mast cell	4.11944	IL12A	1
CCL1	0.0010698	Effector memeory CD8 T cell	1		Monocyte	-3.59424	IL12A	-1
XCL2	0.0065466	Eosinophil	1		Natural killer cell	5.75271	IL12A	1
CXCL13	0.0025079	Eosinophil	1		Regulatory T cell	-3.12912	IL12A	-1
CXCL12	0.0035013	Eosinophil	1		Type 1 T helper cell	3.49352	IL12A	1
CXCL11	0.0050791	Eosinophil	1		Type 2 T helper cell	-3.7335	IL12A	-1
CXCL10	-0.0042109	Eosinophil	-1		Activated dendritic cell	3.15718	IL12B	1
CX3CL1	0.0059552	Eosinophil	1		Effector memeory CD4 T cell	2.74079	IL12B	1
CCL8	0.0049693	Eosinophil	1		Gamma delta T cell	3.75012	IL12B	1
CCL5	0.0038713	Eosinophil	1		Immature dendritic cell	-2.46829	IL12B	-1
CCL4	-0.0036589	Eosinophil	-1		Macrophage	-2.97391	IL12B	-1
CCL3	0.0048627	Eosinophil	1		MDSC	-6.35124	IL12B	-1
CCL16	0.0031714	Eosinophil	1		Monocyte	4.52248	IL12B	1
CCL14	-0.004204	Eosinophil	-1		Plasmacytoid dendritic cell	2.84305	IL12B	1
CCL13	-0.0050423	Eosinophil	-1		Regulatory T cell	3.48762	IL12B	1
XCL2	0.0017005	Immature B cell	1		Type 1 T helper cell	-6.0929	IL12B	-1
XCL1	-0.00068254	Immature B cell	-1		Gamma delta T cell	-6.06932	IL13	-1
PPBP	0.0029115	Immature B cell	1		Natural killer T cell	-14.0871	IL13	-1
CXCL5	-0.0016021	Immature B cell	-1		Neutrophil	-5.78451	IL13	-1
CXCL13	0.00067821	Immature B cell	1		Plasmacytoid dendritic cell	7.57099	IL13	1
CXCL12	-0.00040058	Immature B cell	-1		Type 17 T helper cell	8.21229	IL13	1
CXCL11	-0.00037173	Immature B cell	-1		Type 2 T helper cell	-8.92428	IL13	-1
CXCL10	-0.0011188	Immature B cell	-1		Effector memeory CD4 T cell	7.00582	IL15	1
CX3CL1	-0.00063585	Immature B cell	-1		Macrophage	6.07739	IL15	1
CCL5	-0.00050854	Immature B cell	-1		Mast cell	-6.72517	IL15	-1
CCL24	-0.00056673	Immature B cell	-1		Natural killer T cell	10.0397	IL15	1
CCL21	0.002155	Immature B cell	1		Plasmacytoid dendritic cell	5.42786	IL15	1
CCL20	0.002289	Immature B cell	1		Regulatory T cell	8.10345	IL15	1
CCL2	0.0014775	Immature B cell	1		Type 1 T helper cell	-3.57869	IL15	-1
CCL19	0.0009339	Immature B cell	1		Activated dendritic cell	-1.25097	IL16	-1
CCL18	0.0017885	Immature B cell	1		Central memory CD4 T cell	1.67872	IL16	1
CCL17	-0.0018402	Immature B cell	-1		Central memory CD8 T cell	1.65657	IL16	1
CCL15	0.0021674	Immature B cell	1		Memory B cell	-1.97932	IL16	-1
CCL13	-0.00041185	Immature B cell	-1		Plasmacytoid dendritic cell	-2.13524	IL16	-1
XCL2	-0.00311991	Immature dendritic cell	-1		Regulatory T cell	-1.58566	IL16	-1
PPBP	-0.0034671	Immature dendritic cell	-1		Type 17 T helper cell	-1.89731	IL16	-1
CXCL3	0.00125735	Immature dendritic cell	1		Type 2 T helper cell	1.09749	IL16	1
CXCL2	-0.00129004	Immature dendritic cell	-1		Activated dendritic cell	2.33163	IL17A	1
CXCL12	-0.00170937	Immature dendritic cell	-1		Central memory CD8 T cell	-2.12515	IL17A	-1
CXCL1	0.00230859	Immature dendritic cell	1		Immature B cell	3.35601	IL17A	1
CX3CL1	-0.00161016	Immature dendritic cell	-1		Plasmacytoid dendritic cell	3.62172	IL17A	1
CCL3	-0.00438315	Immature dendritic cell	-1		Type 17 T helper cell	6.90494	IL17A	1
CCL24	-0.00175212	Immature dendritic cell	-1		Activated CD8 T cell	1.79909	IL17B	1
CCL15	0.00330164	Immature dendritic cell	1		CD56dim natural killer cell	4.86966	IL17B	1
XCL2	-0.0024467	Macrophage	-1		Immature B cell	-3.90023	IL17B	-1
PPBP	-0.0044639	Macrophage	-1		Mast cell	-3.79548	IL17B	-1
CXCL2	-0.0023767	Macrophage	-1		Memory B cell	-3.94779	IL17B	-1
CXCL13	-0.0016478	Macrophage	-1		Natural killer T cell	3.66197	IL17B	1
CXCL12	-0.0025196	Macrophage	-1		Plasmacytoid dendritic cell	-3.14652	IL17B	-1
CCL4	0.0018914	Macrophage	1		Regulatory T cell	3.47527	IL17B	1
CCL3	-0.0052635	Macrophage	-1		T follicular helper cell	-1.91852	IL17B	-1
CCL26	-0.002984	Macrophage	-1		Type 1 T helper cell	-1.70711	IL17B	-1
CCL25	-0.001628	Macrophage	-1		Type 17 T helper cell	-3.5882	IL17B	-1
CCL21	-0.0026492	Macrophage	-1		Type 2 T helper cell	1.53886	IL17B	1
CCL15	0.0043043	Macrophage	1		CD56dim natural killer cell	-1.53862	IL17C	-1
CCL14	0.0026167	Macrophage	1		Effector memeory CD4 T cell	1.52971	IL17C	1
CCL13	0.0017995	Macrophage	1		Eosinophil	-3.42683	IL17C	-1
CCL1	0.0012843	Macrophage	1		Macrophage	0.978636	IL17C	1
CX3CL1	-0.0142523	Mast cell	-1		Monocyte	-1.7804	IL17C	-1
CCL3	-0.0146901	Mast cell	-1		Natural killer T cell	1.59336	IL17C	1
CCL13	0.0181651	Mast cell	1		Regulatory T cell	2.44232	IL17C	1
CCL1	-0.0220526	Mast cell	-1		CD56bright natural killer cell	2.0598	IL17D	1
CXCL2	-0.0015205	MDSC	-1		CD56dim natural killer cell	2.43143	IL17D	1
CXCL13	-0.0022361	MDSC	-1		Central memory CD4 T cell	-1.18362	IL17D	-1
CXCL12	-0.002138	MDSC	-1		Effector memeory CD4 T cell	1.49172	IL17D	1
CCL8	0.0019562	MDSC	1		Effector memeory CD8 T cell	-1.78321	IL17D	-1
CCL3	-0.005179	MDSC	-1		Eosinophil	-1.80357	IL17D	-1
CCL26	-0.0042366	MDSC	-1		Macrophage	2.78074	IL17D	1
CCL20	-0.0050215	MDSC	-1		Memory B cell	-2.26368	IL17D	-1
XCL2	0.00552136	Memory B cell	1		Monocyte	-1.71159	IL17D	-1
XCL1	-0.00203298	Memory B cell	-1		T follicular helper cell	-2.50834	IL17D	-1
PPBP	0.00449023	Memory B cell	1		Activated dendritic cell	3.75019	IL17F	1
CXCL2	0.0024647	Memory B cell	1		Macrophage	-5.4114	IL17F	-1
CXCL16	0.00148866	Memory B cell	1		Mast cell	6.8153	IL17F	1
CXCL13	0.00188816	Memory B cell	1		Memory B cell	5.9249	IL17F	1
CXCL11	-0.00202791	Memory B cell	-1		Monocyte	-5.80263	IL17F	-1
CX3CL1	-0.00228977	Memory B cell	-1		Natural killer cell	4.1327	IL17F	1
CCL3	0.00521731	Memory B cell	1		Natural killer T cell	-7.1843	IL17F	-1
CCL21	0.00896619	Memory B cell	1		Type 17 T helper cell	5.2033	IL17F	1
CCL19	-0.0039598	Memory B cell	-1		Type 2 T helper cell	-6.02305	IL17F	-1
CCL15	-0.00426769	Memory B cell	-1		Effector memeory CD4 T cell	1.32649	IL18	1
CCL13	-0.00208314	Memory B cell	-1		Effector memeory CD8 T cell	1.06245	IL18	1
CXCL11	0.011114	Monocyte	1		Eosinophil	-3.04045	IL18	-1
CCL3	0.0083605	Monocyte	1		Macrophage	1.47266	IL18	1
CCL25	-0.010175	Monocyte	-1		Monocyte	-1.23152	IL18	-1
CCL15	-0.00392589	Monocyte	-1		Natural killer cell	0.92538	IL18	1
CCL13	-0.0108499	Monocyte	-1		Plasmacytoid dendritic cell	1.2518	IL18	1
XCL1	-0.0015651	Natural killer cell	1		Regulatory T cell	1.6578	IL18	1
CXCL9	0.00086934	Natural killer cell	1		Activated B cell	-0.488642	IL19	-1
CXCL6	0.0028018	Natural killer cell	1		Activated CD8 T cell	0.571614	IL19	1
CXCL11	-0.0017919	Natural killer cell	-1		Activated dendritic cell	-0.647077	IL19	-1
CXCL10	0.0021934	Natural killer cell	1		Central memory CD4 T cell	-0.758518	IL19	-1
CCL8	-0.001147	Natural killer cell	-1		Effector memeory CD4 T cell	0.281799	IL19	1
CCL4	0.00091327	Natural killer cell	1		Eosinophil	-0.884117	IL19	-1
CCL28	0.0022822	Natural killer cell	1		Gamma delta T cell	-0.662196	IL19	-1
CCL26	0.0028828	Natural killer cell	1		Immature B cell	-0.874911	IL19	-1
CCL25	0.0010112	Natural killer cell	1		Macrophage	0.327764	IL19	1
CCL23	-0.001634	Natural killer cell	-1		Memory B cell	-1.77674	IL19	-1
CCL21	0.0019105	Natural killer cell	1		Natural killer cell	-0.466439	IL19	-1
CCL18	0.0019327	Natural killer cell	1		Natural killer T cell	1.03808	IL19	1
CCL17	-0.0017839	Natural killer cell	-1		Neutrophil	0.072115	IL19	1
CCL14	0.0019396	Natural killer cell	1		Plasmacytoid dendritic cell	-0.298845	IL19	-1
CCL13	0.00093107	Natural killer cell	1		Regulatory T cell	0.964224	IL19	1
CCL11	0.0019077	Natural killer cell	1		T follicular helper cell	-0.269941	IL19	-1
XCL2	-0.0039788	Natural killer T cell	-1		Type 1 T helper cell	-0.214261	IL19	-1
XCL1	0.0020617	Natural killer T cell	1		Type 17 T helper cell	-0.632421	IL19	-1
CXCL9	0.00087867	Natural killer T cell	1		Central memory CD4 T cell	-2.00637	IL20	-1
CXCL13	-0.0020547	Natural killer T cell	-1		Effector memeory CD4 T cell	3.8547	IL20	1
CXCL10	0.0029853	Natural killer T cell	1		Eosinophil	-3.66689	IL20	-1
CX3CL1	0.0035848	Natural killer T cell	1		Memory B cell	2.46436	IL20	1
CCL5	-0.0018493	Natural killer T cell	-1		Natural killer T cell	2.7181	IL20	1
CCL4	0.001073	Natural killer T cell	1		Neutrophil	1.60138	IL20	1
CCL3	-0.0015878	Natural killer T cell	-1		Plasmacytoid dendritic cell	2.88079	IL20	1
CCL28	-0.0030608	Natural killer T cell	-1		Regulatory T cell	3.20583	IL20	1
CCL22	0.0026852	Natural killer T cell	1		Type 17 T helper cell	2.1524	IL20	1
CCL21	-0.0075783	Natural killer T cell	-1		Type 2 T helper cell	-1.48351	IL20	-1
CCL13	0.0022105	Natural killer T cell	1		Activated B cell	1.37633	IL21	1
CCL1	0.00095353	Natural killer T cell	1		Central memory CD4 T cell	-2.11209	IL21	-1
CX3CL1	0.00083547	Neutrophil	1		Immature B cell	2.19434	IL21	1
CCL15	-0.0020868	Neutrophil	-1		Macrophage	2.36608	IL21	1
XCL1	-0.0044062	Plasmacytoid dendritic cell	-1		Natural killer T cell	2.98219	IL21	1
CXCL9	0.0041005	Plasmacytoid dendritic cell	1		Plasmacytoid dendritic cell	2.49569	IL21	1
CXCL2	-0.004546	Plasmacytoid dendritic cell	-1		Regulatory T cell	2.57171	IL21	1
CXCL11	-0.0059048	Plasmacytoid dendritic cell	-1		Activated CD4 T cell	2.67703	IL22	1
CX3CL1	-0.0048838	Plasmacytoid dendritic cell	-1		Activated CD8 T cell	3.43784	IL22	1
CCL8	-0.0040865	Plasmacytoid dendritic cell	-1		Effector memeory CD4 T cell	2.1473	IL22	1
CCL5	-0.0042117	Plasmacytoid dendritic cell	-1		Eosinophil	-3.66388	IL22	-1
CCL4	0.0031145	Plasmacytoid dendritic cell	1		Immature B cell	-3.46013	IL22	-1
CCL25	-0.0051758	Plasmacytoid dendritic cell	-1		Monocyte	-2.20942	IL22	-1
CCL15	0.0035168	Plasmacytoid dendritic cell	1		Natural killer cell	3.57179	IL22	1
CCL14	0.0057405	Plasmacytoid dendritic cell	1		T follicular helper cell	-2.27965	IL22	-1
CCL13	0.0047815	Plasmacytoid dendritic cell	1		Type 2 T helper cell	-1.491	IL22	-1
XCL2	-0.0059773	Regulatory T cell	-1		Activated B cell	-8.07298	IL23A	-1
PPBP	0.0041772	Regulatory T cell	1		CD56bright natural killer cell	5.87855	IL23A	1
CXCL5	0.0044737	Regulatory T cell	1		Effector memeory CD8 T cell	3.63083	IL23A	1
CXCL11	-0.0048589	Regulatory T cell	-1		Natural killer T cell	-7.44727	IL23A	-1
CCL8	-0.0034441	Regulatory T cell	-1		Regulatory T cell	4.42796	IL23A	1
CCL5	-0.0033714	Regulatory T cell	-1		Type 17 T helper cell	11.0804	IL23A	1
CCL4	0.0029445	Regulatory T cell	1		CD56bright natural killer cell	-3.15068	IL24	-1
CCL28	-0.0032509	Regulatory T cell	-1		Eosinophil	3.46249	IL24	1
CCL25	-0.0023926	Regulatory T cell	-1		Gamma delta T cell	-3.97183	IL24	-1
CCL21	-0.0062249	Regulatory T cell	-1		Monocyte	2.64873	IL24	1
CCL16	-0.0041043	Regulatory T cell	-1		Natural killer cell	4.34699	IL24	1
CCL15	0.0041586	Regulatory T cell	1		T follicular helper cell	3.83683	IL24	1
CCL13	0.0029062	Regulatory T cell	1		Type 1 T helper cell	-6.76653	IL24	-1
XCL2	0.00075703	T follicular helper cell	1		Type 2 T helper cell	3.61245	IL24	1
CXCL13	0.0005899	T follicular helper cell	1		Activated dendritic cell	1.84428	IL25	1
CXCL12	-0.00046579	T follicular helper cell	-1		CD56dim natural killer cell	1.80764	IL25	1
CX3CL1	-0.00050536	T follicular helper cell	-1		Central memory CD4 T cell	1.79036	IL25	1
CCL23	0.0015945	T follicular helper cell	1		Central memory CD8 T cell	-2.51374	IL25	-1
CCL2	0.0010485	T follicular helper cell	1		Eosinophil	-2.05109	IL25	-1
CCL15	0.0011928	T follicular helper cell	1		Immature B cell	2.91345	IL25	1
XCL2	0.0034625	Type 1 T helper cell	1		Immature dendritic cell	2.5066	IL25	1
XCL1	-0.014087	Type 1 T helper cell	-1		MDSC	2.85006	IL25	1
CXCL13	-0.0077782	Type 1 T helper cell	-1		Monocyte	-2.46759	IL25	-1
CCL20	-0.0021204	Type 1 T helper cell	-1		Natural killer cell	2.98153	IL25	1
CXCL14	-0.0029942	Type 17 T helper cell	-1		Natural killer T cell	-2.75905	IL25	-1
CX3CL1	-0.0098435	Type 17 T helper cell	-1		Plasmacytoid dendritic cell	2.21471	IL25	1
CCL8	-0.008586	Type 17 T helper cell	-1		Type 1 T helper cell	1.60537	IL25	1
CCL21	0.0056304	Type 17 T helper cell	1		Type 2 T helper cell	-1.43308	IL25	-1
CCL18	0.0042438	Type 17 T helper cell	1		Activated CD8 T cell	1.08808	IL26	1
					CD56dim natural killer cell	2.14201	IL26	1
					Central memory CD8 T cell	1.67358	IL26	1
					Effector memeory CD4 T cell	-1.51775	IL26	-1
					Effector memeory CD8 T cell	1.44776	IL26	1
					Eosinophil	2.26095	IL26	1
					Monocyte	1.49416	IL26	1
					Plasmacytoid dendritic cell	-1.30845	IL26	-1
					Regulatory T cell	-1.34885	IL26	-1
					Type 2 T helper cell	1.89223	IL26	1
					Effector memeory CD4 T cell	1.18068	IL27	1
					Eosinophil	-1.97958	IL27	-1
					Immature B cell	1.59904	IL27	1
					Macrophage	1.67092	IL27	1
					Monocyte	-1.46216	IL27	-1
					Natural killer T cell	1.48772	IL27	1
					Regulatory T cell	1.31073	IL27	1
					Type 2 T helper cell	1.11556	IL27	1
					Activated B cell	1.20855	IL31	1
					CD56bright natural killer cell	1.75966	IL31	1
					CD56dim natural killer cell	4.87622	IL31	1
					Effector memeory CD4 T cell	2.52837	IL31	1
					Eosinophil	-4.47046	IL31	-1
					Gamma delta T cell	1.89226	IL31	1
					Macrophage	1.80229	IL31	1
					Mast cell	-3.16823	IL31	-1
					Natural killer T cell	1.85556	IL31	1
					Plasmacytoid dendritic cell	3.70136	IL31	1
					Regulatory T cell	5.72339	IL31	1
					T follicular helper cell	-1.40738	IL31	-1
					Type 1 T helper cell	-1.3627	IL31	-1
					Type 17 T helper cell	2.58168	IL31	1
					Activated B cell	-2.07868	IL32	-1
					Activated CD8 T cell	1.2394	IL32	1
					Activated dendritic cell	-1.87858	IL32	-1
					CD56bright natural killer cell	-2.23791	IL32	-1
					Eosinophil	2.56162	IL32	1
					Gamma delta T cell	-2.61308	IL32	-1
					Immature B cell	-2.25878	IL32	-1
					Immature dendritic cell	-1.6683	IL32	-1
					Mast cell	-2.22247	IL32	-1
					Memory B cell	-4.31032	IL32	-1
					Monocyte	1.59141	IL32	1
					Natural killer cell	-2.2513	IL32	-1
					Natural killer T cell	3.57727	IL32	1
					Neutrophil	1.14873	IL32	1
					Plasmacytoid dendritic cell	-3.80752	IL32	-1
					Type 1 T helper cell	-1.66147	IL32	-1
					Type 17 T helper cell	-4.37183	IL32	-1
					Type 2 T helper cell	1.34857	IL32	1
					Activated B cell	-1.8002	IL33	-1
					Activated CD8 T cell	1.97991	IL33	1
					Activated dendritic cell	-1.51859	IL33	-1
					CD56dim natural killer cell	3.34454	IL33	1
					Central memory CD4 T cell	-0.918999	IL33	-1
					Central memory CD8 T cell	1.30385	IL33	1
					Effector memeory CD8 T cell	1.00365	IL33	1
					Gamma delta T cell	-1.42049	IL33	-1
					Macrophage	1.44221	IL33	1
					Mast cell	-1.27103	IL33	-1
					MDSC	1.3979	IL33	1
					Memory B cell	-4.42017	IL33	-1
					Natural killer T cell	1.20006	IL33	1
					Plasmacytoid dendritic cell	-0.85563	IL33	-1
					Regulatory T cell	1.31128	IL33	1
					Type 17 T helper cell	-1.71747	IL33	-1
					Type 2 T helper cell	1.76405	IL33	1
					Activated CD8 T cell	2.09156	IL34	1
					CD56dim natural killer cell	2.01155	IL34	1
					Eosinophil	2.1184	IL34	1
					Gamma delta T cell	-1.45924	IL34	-1
					Mast cell	-1.80012	IL34	-1
					MDSC	2.08186	IL34	1
					Natural killer T cell	1.1573	IL34	1
					Type 17 T helper cell	-1.76938	IL34	-1
					Type 2 T helper cell	1.61722	IL34	1
					Monocyte	-5.5775	IL14	-1
					Natural killer cell	4.1252	IL14	1
					Neutrophil	-3.8134	IL14	-1
					Regulatory T cell	8.35318	IL14	1

## Sheet: Diffuse
Table S7-7-1 The results of correlation between chemokines and immune cells in diffuse gastric cancer by PLSR					Table S7-7-2 The results of correlation between immune cells and interleukins in diffuse gastric cancer by PLSR
Chemokine	Estimate	Immune Cell	Sign		Immune Cell	Estimate	Interleukin	Sign
XCL1	-0.00039953	Activated B cell	-1		CD56bright natural killer cell	-1.83226	IFNG	-1
CXCL3	0.00027894	Activated B cell	1		CD56dim natural killer cell	-2.81175	IFNG	-1
CXCL16	0.00031107	Activated B cell	1		Central memory CD4 T cell	1.06227	IFNG	1
CXCL13	0.000433	Activated B cell	1		Central memory CD8 T cell	1.47896	IFNG	1
CXCL10	-0.00066117	Activated B cell	-1		Eosinophil	3.41205	IFNG	1
CX3CL1	-0.00056159	Activated B cell	-1		Gamma delta T cell	-1.8661	IFNG	-1
CCL21	0.0013756	Activated B cell	1		Macrophage	-2.16216	IFNG	-1
CCL20	0.0016319	Activated B cell	1		Natural killer T cell	-1.05454	IFNG	-1
CCL2	0.002115	Activated B cell	1		Neutrophil	-1.22672	IFNG	-1
CCL18	0.0015233	Activated B cell	1		Plasmacytoid dendritic cell	-1.7137	IFNG	-1
CCL1	-0.00018596	Activated B cell	-1		Regulatory T cell	-1.88027	IFNG	-1
CCL20	0.002327	Activated CD4 T cell	1		Activated CD8 T cell	-3.80175	IL1A	-1
XCL2	-0.002185	Activated CD8 T cell	-1		Type 17 T helper cell	-3.55039	IL1A	-1
XCL1	0.0004478	Activated CD8 T cell	1		Type 2 T helper cell	-7.25925	IL1A	-1
PPBP	-0.0025111	Activated CD8 T cell	-1		Natural killer T cell	1.0464	IL1B	1
CXCL13	-0.00055421	Activated CD8 T cell	-1		Type 17 T helper cell	-0.787422	IL1B	-1
CXCL10	0.0019754	Activated CD8 T cell	1		Type 2 T helper cell	0.695059	IL1B	1
CCL4	0.00038013	Activated CD8 T cell	1		CD56bright natural killer cell	3.40414	IL2	1
CCL21	-0.0026519	Activated CD8 T cell	-1		CD56dim natural killer cell	2.66166	IL2	1
CCL20	-0.0016533	Activated CD8 T cell	-1		Effector memeory CD4 T cell	1.5572	IL2	1
CCL19	-0.001096	Activated CD8 T cell	-1		Eosinophil	-2.27054	IL2	-1
CCL18	-0.0017394	Activated CD8 T cell	-1		Natural killer cell	3.16287	IL2	1
CCL15	-0.0023108	Activated CD8 T cell	-1		Neutrophil	1.2892	IL2	1
CCL14	0.00080262	Activated CD8 T cell	1		T follicular helper cell	-1.55046	IL2	-1
CCL13	0.0010478	Activated CD8 T cell	1		Type 1 T helper cell	1.22283	IL2	1
CCL1	0.0003664	Activated CD8 T cell	1		CD56bright natural killer cell	3.64751	IL3	1
XCL2	0.0020053	Activated dendritic cell	1		CD56dim natural killer cell	5.09355	IL3	1
XCL1	-0.00048591	Activated dendritic cell	-1		Immature dendritic cell	-4.6463	IL3	-1
PPBP	0.0015529	Activated dendritic cell	1		Plasmacytoid dendritic cell	4.54277	IL3	1
CXCL2	0.00024986	Activated dendritic cell	1		Regulatory T cell	3.01474	IL3	1
CXCL16	0.00035892	Activated dendritic cell	1		Activated B cell	-0.892082	IL4	-1
CXCL13	0.00070378	Activated dendritic cell	1		CD56dim natural killer cell	1.93667	IL4	1
CX3CL1	-0.00054842	Activated dendritic cell	-1		Gamma delta T cell	-1.92231	IL4	-1
CCL3	0.00094359	Activated dendritic cell	1		Mast cell	-2.64524	IL4	-1
CCL21	0.0016649	Activated dendritic cell	1		Type 17 T helper cell	-1.11666	IL4	-1
CCL20	0.0022616	Activated dendritic cell	1		Activated dendritic cell	-0.940834	IL5	-1
CCL18	0.0015659	Activated dendritic cell	1		Macrophage	1.16958	IL5	1
CCL15	0.0016772	Activated dendritic cell	1		Memory B cell	-2.27482	IL5	-1
CCL13	-0.00053862	Activated dendritic cell	-1		Natural killer cell	-1.70604	IL5	-1
CCL1	-0.00026284	Activated dendritic cell	-1		Natural killer T cell	2.35619	IL5	1
XCL1	-0.0014846	CD56bright natural killer cell	-1		Plasmacytoid dendritic cell	-2.07737	IL5	-1
PF4	-0.00096033	CD56bright natural killer cell	-1		Regulatory T cell	1.97982	IL5	1
CXCL9	0.0010737	CD56bright natural killer cell	1		Type 17 T helper cell	-1.23217	IL5	-1
CXCL5	-0.0046507	CD56bright natural killer cell	-1		Activated B cell	-1.31192	IL6	-1
CXCL1	0.0023321	CD56bright natural killer cell	1		Activated dendritic cell	-1.5681	IL6	-1
CCL14	0.0013198	CD56bright natural killer cell	1		Memory B cell	-4.80177	IL6	-1
CCL13	0.00094715	CD56bright natural killer cell	1		Natural killer T cell	1.97098	IL6	1
XCL2	-0.006023	CD56dim natural killer cell	-1		Plasmacytoid dendritic cell	-1.46541	IL6	-1
CXCL2	-0.0033796	CD56dim natural killer cell	-1		Regulatory T cell	3.06912	IL6	1
CXCL10	0.0068049	CD56dim natural killer cell	1		Type 1 T helper cell	-1.07231	IL6	-1
CXCL1	0.0062572	CD56dim natural killer cell	1		Type 17 T helper cell	-1.98677	IL6	-1
CCL25	-0.004684	CD56dim natural killer cell	-1		Type 2 T helper cell	1.27996	IL6	1
CCL20	0.0066252	CD56dim natural killer cell	1		CD56dim natural killer cell	1.69014	IL7	1
CCL14	0.0041971	CD56dim natural killer cell	1		Gamma delta T cell	-0.855169	IL7	-1
CCL1	0.0018041	CD56dim natural killer cell	1		Macrophage	0.68197	IL7	1
XCL2	0.002234	Central memory CD4 T cell	1		Mast cell	-1.87244	IL7	-1
XCL1	-0.00031421	Central memory CD4 T cell	-1		Memory B cell	-1.51885	IL7	-1
PPBP	0.0020382	Central memory CD4 T cell	1		Natural killer cell	0.828717	IL7	1
CX3CL1	-0.00065737	Central memory CD4 T cell	-1		Natural killer T cell	0.704544	IL7	1
CCL4	-0.0004379	Central memory CD4 T cell	-1		Activated CD4 T cell	-12.4056	IL10	-1
CCL3	0.00068334	Central memory CD4 T cell	1		Activated CD8 T cell	-9.91947	IL10	-1
CCL21	0.0017481	Central memory CD4 T cell	1		Effector memeory CD4 T cell	-16.9302	IL10	-1
CCL19	0.0010303	Central memory CD4 T cell	1		MDSC	-8.23377	IL10	-1
CCL18	0.00093252	Central memory CD4 T cell	1		Natural killer T cell	12.9909	IL10	1
CCL15	0.0013163	Central memory CD4 T cell	1		Regulatory T cell	7.56547	IL10	1
CCL13	-0.00061329	Central memory CD4 T cell	-1		Type 17 T helper cell	-10.6669	IL10	-1
XCL1	0.0015747	Central memory CD8 T cell	1		Activated CD4 T cell	3.16645	IL12A	1
CXCL5	0.0043098	Central memory CD8 T cell	1		Effector memeory CD4 T cell	5.1359	IL12A	1
CXCL11	0.0015779	Central memory CD8 T cell	1		Eosinophil	-5.756	IL12A	-1
CX3CL1	0.0019613	Central memory CD8 T cell	1		Memory B cell	5.43095	IL12A	1
CCL8	0.0013639	Central memory CD8 T cell	1		Monocyte	-3.87744	IL12A	-1
CCL3	0.002331	Central memory CD8 T cell	1		Natural killer cell	5.01407	IL12A	1
CCL21	-0.0027198	Central memory CD8 T cell	-1		Plasmacytoid dendritic cell	5.28312	IL12A	1
CCL15	-0.003209	Central memory CD8 T cell	-1		Eosinophil	3.93171	IL12B	1
CCL1	0.001004	Central memory CD8 T cell	1		MDSC	-6.627	IL12B	-1
CCL8	-0.022194	Effector memeory CD4 T cell	-1		Activated CD8 T cell	-7.05364	IL13	-1
CXCL5	0.0053526	Effector memeory CD8 T cell	1		Central memory CD8 T cell	-5.90342	IL13	-1
CXCL11	0.00080676	Effector memeory CD8 T cell	1		Immature B cell	5.00241	IL13	1
CXCL1	-0.0019109	Effector memeory CD8 T cell	-1		Memory B cell	5.52694	IL13	1
XCL2	0.0054099	Eosinophil	1		Natural killer T cell	-5.71299	IL13	-1
CXCL11	0.0053103	Eosinophil	1		Plasmacytoid dendritic cell	5.24601	IL13	1
CCL5	0.0071516	Eosinophil	1		Type 17 T helper cell	3.87633	IL13	1
CCL4	-0.0058052	Eosinophil	-1		Type 2 T helper cell	-3.81321	IL13	-1
CCL3	0.0075758	Eosinophil	1		Activated CD4 T cell	3.15117	IL15	1
CCL28	0.0062372	Eosinophil	1		CD56dim natural killer cell	3.32494	IL15	1
CCL24	0.002327	Eosinophil	1		Macrophage	2.43596	IL15	1
CCL14	-0.0052466	Eosinophil	-1		MDSC	-3.50701	IL15	-1
CCL13	-0.0061139	Eosinophil	-1		Natural killer T cell	2.70527	IL15	1
CCL11	0.0084098	Eosinophil	1		Plasmacytoid dendritic cell	3.32937	IL15	1
CCL1	0.0006508	Eosinophil	1		Regulatory T cell	6.93703	IL15	1
XCL1	-0.00085131	Gamma delta T cell	-1		Central memory CD4 T cell	3.99771	IL16	1
CXCL13	0.00065353	Gamma delta T cell	1		Memory B cell	-6.66141	IL16	-1
CXCL10	-0.0017056	Gamma delta T cell	-1		Monocyte	2.67546	IL16	1
CX3CL1	-0.0017015	Gamma delta T cell	-1		Neutrophil	-4.12521	IL16	-1
CCL4	-0.00038704	Gamma delta T cell	-1		Activated CD8 T cell	-2.89903	IL17A	-1
CCL21	0.0021563	Gamma delta T cell	1		Activated dendritic cell	3.37149	IL17A	1
CCL20	0.0035251	Gamma delta T cell	1		CD56dim natural killer cell	2.45754	IL17A	1
CCL18	0.0025102	Gamma delta T cell	1		MDSC	-6.63447	IL17A	-1
XCL1	-0.001017	Immature B cell	-1		Memory B cell	3.39006	IL17A	1
PPBP	0.0027715	Immature B cell	1		Neutrophil	-3.74716	IL17A	-1
CX3CL1	-0.0013966	Immature B cell	-1		Type 1 T helper cell	-4.92302	IL17A	-1
CCL8	-0.00080158	Immature B cell	-1		Type 17 T helper cell	4.16608	IL17A	1
CCL5	-0.00055676	Immature B cell	-1		CD56dim natural killer cell	2.91566	IL17B	1
CCL24	-0.0006762	Immature B cell	-1		Mast cell	-4.46781	IL17B	-1
CCL21	0.0029565	Immature B cell	1		Memory B cell	-6.0238	IL17B	-1
CCL20	0.0023068	Immature B cell	1		Natural killer T cell	4.34709	IL17B	1
CCL15	0.00234	Immature B cell	1		Plasmacytoid dendritic cell	-3.05831	IL17B	-1
XCL2	-0.00216	Immature dendritic cell	-1		Regulatory T cell	3.42123	IL17B	1
PPBP	-0.0022052	Immature dendritic cell	-1		Type 1 T helper cell	-2.35024	IL17B	-1
CCL8	-0.001248	Immature dendritic cell	-1		Type 17 T helper cell	-3.12941	IL17B	-1
CCL3	-0.0018209	Immature dendritic cell	-1		Type 2 T helper cell	2.19281	IL17B	1
CCL16	-0.0010398	Immature dendritic cell	-1		Activated CD4 T cell	-2.93368	IL17C	-1
CCL15	-0.0014962	Immature dendritic cell	-1		Activated CD8 T cell	2.96836	IL17C	1
XCL2	-0.0055873	Macrophage	-1		CD56dim natural killer cell	-4.82905	IL17C	-1
CXCL3	0.0015011	Macrophage	1		Eosinophil	-4.43002	IL17C	-1
CXCL2	-0.0017393	Macrophage	-1		MDSC	-5.10224	IL17C	-1
CXCL14	-0.003524	Macrophage	-1		Type 2 T helper cell	4.7954	IL17C	1
CXCL13	-0.0019378	Macrophage	-1		Activated CD4 T cell	2.03099	IL17D	1
CXCL12	-0.0030749	Macrophage	-1		CD56bright natural killer cell	2.99188	IL17D	1
CCL8	-0.0017769	Macrophage	-1		CD56dim natural killer cell	2.62889	IL17D	1
CCL4	0.0020048	Macrophage	1		Central memory CD4 T cell	-1.49934	IL17D	-1
CCL3	-0.0037247	Macrophage	-1		Effector memeory CD4 T cell	2.13348	IL17D	1
CCL28	-0.0042392	Macrophage	-1		Effector memeory CD8 T cell	-3.18324	IL17D	-1
CCL24	-0.0019322	Macrophage	-1		Macrophage	2.75942	IL17D	1
CCL17	-0.0021493	Macrophage	-1		Natural killer cell	2.06201	IL17D	1
CCL16	-0.0029891	Macrophage	-1		T follicular helper cell	-2.37245	IL17D	-1
CCL14	0.0027847	Macrophage	1		Activated dendritic cell	4.41739	IL17F	1
CCL13	0.0033214	Macrophage	1		Effector memeory CD8 T cell	-5.61342	IL17F	-1
CXCL10	-0.0056321	Mast cell	-1		Macrophage	-3.91739	IL17F	-1
CX3CL1	-0.0050099	Mast cell	-1		MDSC	-5.62015	IL17F	-1
CCL5	-0.0032941	Mast cell	-1		Memory B cell	4.43169	IL17F	1
CCL3	-0.0029473	Mast cell	-1		Natural killer cell	8.52326	IL17F	1
CCL28	-0.0053555	Mast cell	-1		Natural killer T cell	-5.15182	IL17F	-1
CCL11	-0.0052689	Mast cell	-1		Plasmacytoid dendritic cell	3.91138	IL17F	1
CCL1	-0.0018037	Mast cell	-1		T follicular helper cell	-5.35579	IL17F	-1
CCL18	-0.0018871	MDSC	-1		Central memory CD8 T cell	-0.979977	IL18	-1
XCL2	0.004478	Memory B cell	1		Effector memeory CD4 T cell	1.39983	IL18	1
XCL1	-0.0014649	Memory B cell	-1		Eosinophil	-3.12205	IL18	-1
PPBP	0.0039974	Memory B cell	1		Macrophage	1.47552	IL18	1
PF4	-0.00062103	Memory B cell	-1		Natural killer cell	1.17658	IL18	1
CXCL2	0.0008437	Memory B cell	1		Natural killer T cell	1.42087	IL18	1
CXCL14	0.0019472	Memory B cell	1		Plasmacytoid dendritic cell	0.988449	IL18	1
CXCL1	0.0021111	Memory B cell	1		Regulatory T cell	2.46257	IL18	1
CX3CL1	-0.002241	Memory B cell	-1		Activated B cell	-0.667867	IL19	-1
CCL4	-0.0004341	Memory B cell	-1		Activated CD8 T cell	0.724127	IL19	1
CCL3	0.0015131	Memory B cell	1		Activated dendritic cell	-0.913471	IL19	-1
CCL22	0.001677	Memory B cell	1		Central memory CD4 T cell	-0.593472	IL19	-1
CCL21	0.0040601	Memory B cell	1		Eosinophil	-0.750175	IL19	-1
CCL20	0.0021267	Memory B cell	1		Immature B cell	-1.17981	IL19	-1
CCL18	0.0023806	Memory B cell	1		Memory B cell	-1.7365	IL19	-1
CCL16	0.0011144	Memory B cell	1		Natural killer T cell	1.00898	IL19	1
CCL15	0.0028637	Memory B cell	1		Plasmacytoid dendritic cell	-0.448478	IL19	-1
CCL1	-0.00041647	Memory B cell	-1		Regulatory T cell	1.18225	IL19	1
PF4	0.0011533	Monocyte	1		Type 17 T helper cell	-1.01812	IL19	-1
CXCL9	-0.00065842	Monocyte	-1		CD56dim natural killer cell	1.57706	IL20	1
CXCL13	0.001363	Monocyte	1		Central memory CD4 T cell	-1.05659	IL20	-1
CXCL11	0.0011437	Monocyte	1		Central memory CD8 T cell	-1.24867	IL20	-1
CCL25	-0.0011769	Monocyte	-1		Effector memeory CD4 T cell	1.28332	IL20	1
CCL2	0.0045653	Monocyte	1		Eosinophil	-3.09753	IL20	-1
CXCL5	-0.00389982	Natural killer cell	-1		Immature B cell	1.41262	IL20	1
CCL4	0.03118	Natural killer cell	1		Macrophage	1.93667	IL20	1
CCL11	0.00801672	Natural killer cell	1		Memory B cell	1.53077	IL20	1
XCL2	-0.0028826	Natural killer T cell	-1		Natural killer cell	1.29953	IL20	1
XCL1	0.00099748	Natural killer T cell	1		Natural killer T cell	1.1779	IL20	1
PPBP	-0.0026883	Natural killer T cell	-1		Neutrophil	1.32381	IL20	1
CXCL5	0.002297	Natural killer T cell	1		Plasmacytoid dendritic cell	1.80176	IL20	1
CXCL2	-0.00059231	Natural killer T cell	-1		Regulatory T cell	3.2312	IL20	1
CXCL14	-0.0013734	Natural killer T cell	-1		Immature B cell	1.96136	IL21	1
CXCL13	-0.00065622	Natural killer T cell	-1		Macrophage	1.64441	IL21	1
CXCL1	-0.0018116	Natural killer T cell	-1		MDSC	-1.43433	IL21	-1
CX3CL1	0.0014684	Natural killer T cell	1		Natural killer T cell	1.27028	IL21	1
CCL4	0.00059866	Natural killer T cell	1		Plasmacytoid dendritic cell	0.870336	IL21	1
CCL3	-0.0012414	Natural killer T cell	-1		Regulatory T cell	2.80825	IL21	1
CCL21	-0.0032803	Natural killer T cell	-1		Activated CD8 T cell	3.4706	IL22	1
CCL20	-0.0020907	Natural killer T cell	-1		Effector memeory CD4 T cell	3.32506	IL22	1
CCL15	-0.0014149	Natural killer T cell	-1		Eosinophil	-2.72419	IL22	-1
CCL13	0.00075213	Natural killer T cell	1		Macrophage	1.44013	IL22	1
XCL2	-0.0014058	Neutrophil	-1		Natural killer cell	3.84942	IL22	1
CX3CL1	0.00085198	Neutrophil	1		Natural killer T cell	1.39497	IL22	1
XCL1	-0.014594	Plasmacytoid dendritic cell	-1		T follicular helper cell	-2.23091	IL22	-1
PPBP	-0.0050244	Plasmacytoid dendritic cell	-1		Eosinophil	2.5321	IL23A	1
CXCL9	0.0080208	Plasmacytoid dendritic cell	1		Natural killer T cell	-2.08402	IL23A	-1
CXCL11	-0.010456	Plasmacytoid dendritic cell	-1		Type 17 T helper cell	1.65153	IL23A	1
CCL14	0.0088115	Plasmacytoid dendritic cell	1		Natural killer T cell	3.88891	IL24	1
XCL2	-0.0048795	Regulatory T cell	-1		Plasmacytoid dendritic cell	-3.58303	IL24	-1
XCL1	0.0010418	Regulatory T cell	1		T follicular helper cell	4.36914	IL24	1
PPBP	-0.0023113	Regulatory T cell	-1		Type 1 T helper cell	-10.1626	IL24	-1
CXCL5	0.0039529	Regulatory T cell	1		Activated B cell	1.18424	IL25	1
CXCL14	-0.0025775	Regulatory T cell	-1		Activated CD8 T cell	-2.76766	IL25	-1
CXCL1	-0.0027525	Regulatory T cell	-1		Activated dendritic cell	1.41379	IL25	1
CCL4	0.00087603	Regulatory T cell	1		Central memory CD4 T cell	1.19326	IL25	1
CCL3	-0.0014311	Regulatory T cell	-1		Central memory CD8 T cell	-1.83944	IL25	-1
CCL28	-0.0028435	Regulatory T cell	-1		Effector memeory CD8 T cell	-1.77556	IL25	-1
CCL25	-0.00073951	Regulatory T cell	-1		Immature B cell	3.20266	IL25	1
CCL21	-0.0034378	Regulatory T cell	-1		Memory B cell	3.2613	IL25	1
CCL16	-0.0020874	Regulatory T cell	-1		Natural killer cell	2.49756	IL25	1
CXCL13	0.00087249	T follicular helper cell	1		Natural killer T cell	-2.55878	IL25	-1
CXCL11	0.0005763	T follicular helper cell	1		Plasmacytoid dendritic cell	1.92958	IL25	1
CCL26	-0.0014617	T follicular helper cell	-1		Regulatory T cell	-3.21733	IL25	-1
CCL23	0.0020936	T follicular helper cell	1		Type 1 T helper cell	1.53657	IL25	1
CCL2	0.0022951	T follicular helper cell	1		Type 17 T helper cell	1.8882	IL25	1
XCL2	0.0030012	Type 1 T helper cell	1		Type 2 T helper cell	-1.6745	IL25	-1
XCL1	-0.0016731	Type 1 T helper cell	-1		CD56dim natural killer cell	4.45197	IL26	1
PF4	-0.0014639	Type 1 T helper cell	-1		Central memory CD8 T cell	4.94027	IL26	1
CXCL5	-0.0029001	Type 1 T helper cell	-1		Natural killer T cell	7.60027	IL26	1
CXCL13	-0.0014083	Type 1 T helper cell	-1		Type 1 T helper cell	-7.56596	IL26	-1
CX3CL1	-0.0020038	Type 1 T helper cell	-1		Activated CD8 T cell	0.511724	IL27	1
CCL21	0.0023242	Type 1 T helper cell	1		Activated dendritic cell	-0.614219	IL27	-1
CCL18	-0.0017132	Type 1 T helper cell	-1		Eosinophil	-0.965412	IL27	-1
CCL15	-0.0023338	Type 1 T helper cell	-1		Macrophage	0.745075	IL27	1
XCL2	-0.0012261	Type 2 T helper cell	-1		Memory B cell	-1.25522	IL27	-1
XCL1	0.00051087	Type 2 T helper cell	1		Natural killer T cell	1.0246	IL27	1
PPBP	-0.0020109	Type 2 T helper cell	-1		Regulatory T cell	1.68964	IL27	1
CXCL10	0.00084505	Type 2 T helper cell	1		T follicular helper cell	-0.429059	IL27	-1
CX3CL1	0.00072829	Type 2 T helper cell	1		Type 17 T helper cell	-0.623187	IL27	-1
CCL21	-0.0019775	Type 2 T helper cell	-1		CD56dim natural killer cell	5.70434	IL31	1
CCL20	-0.0011829	Type 2 T helper cell	-1		Central memory CD4 T cell	-2.18436	IL31	-1
CCL18	-0.0010984	Type 2 T helper cell	-1		Effector memeory CD4 T cell	2.04656	IL31	1
CCL1	0.00035173	Type 2 T helper cell	1		Eosinophil	-5.23172	IL31	-1
XCL1	-0.00068235	Type 17 T helper cell	-1		Macrophage	2.58374	IL31	1
CXCL5	-0.0023317	Type 17 T helper cell	-1		Natural killer T cell	1.75337	IL31	1
CXCL2	0.00043863	Type 17 T helper cell	1		Plasmacytoid dendritic cell	3.63062	IL31	1
CXCL13	0.00078821	Type 17 T helper cell	1		Regulatory T cell	4.67889	IL31	1
CXCL1	0.0011801	Type 17 T helper cell	1		Activated CD8 T cell	-9.6377	IL32	-1
CX3CL1	-0.0012681	Type 17 T helper cell	-1		Activated dendritic cell	-13.2037	IL32	-1
CCL8	-0.00062905	Type 17 T helper cell	-1		Gamma delta T cell	8.53505	IL32	1
CCL3	0.00071612	Type 17 T helper cell	1		Immature dendritic cell	-9.44413	IL32	-1
CCL21	0.0022763	Type 17 T helper cell	1		Macrophage	-10.4529	IL32	-1
CCL20	0.0021476	Type 17 T helper cell	1		Plasmacytoid dendritic cell	-9.10388	IL32	-1
CCL18	0.0017866	Type 17 T helper cell	1		Type 17 T helper cell	-10.9151	IL32	-1
					Activated B cell	-0.977762	IL33	-1
					Activated dendritic cell	-1.31249	IL33	-1
					Central memory CD8 T cell	1.82366	IL33	1
					Gamma delta T cell	-1.95068	IL33	-1
					Immature B cell	-1.35208	IL33	-1
					Memory B cell	-2.99296	IL33	-1
					Natural killer T cell	1.92199	IL33	1
					Plasmacytoid dendritic cell	-1.45851	IL33	-1
					Type 17 T helper cell	-1.92067	IL33	-1
					Type 2 T helper cell	1.27355	IL33	1
					CD56dim natural killer cell	2.40205	IL34	1
					Mast cell	-3.89751	IL34	-1
					Natural killer T cell	1.68975	IL34	1
					Type 2 T helper cell	2.37739	IL34	1
					Eosinophil	14.0484	TXLNA	1
					Immature B cell	9.16758	TXLNA	1
					MDSC	-11.2245	TXLNA	-1
					Natural killer cell	10.9294	TXLNA	1
					Regulatory T cell	13.163	TXLNA	1
					T follicular helper cell	-7.36224	TXLNA	-1

## Sheet: ﻿intestinal
Table S8-8-1 The results of correlation between chemokines and immune cells in intestinal gastric cancer by PLSR					Table S8-7-2 The results of correlation between immune cells and interleukins in intestinal gastric cancer by PLSR
Chemokine	Estimate	Immune Cell	Sign		Immune Cell	Estimate	Interleukin	Sign
PF4	-0.0033372	Activated B cell	-1		CD56dim natural killer cell	-2.42642	IFNG	-1
CCL3	-0.0053859	Activated B cell	-1		Eosinophil	4.80977	IFNG	1
CCL28	-0.0033824	Activated B cell	-1		Immature dendritic cell	2.3341	IFNG	1
CCL21	0.0095801	Activated B cell	1		Macrophage	-2.86683	IFNG	-1
PF4	-0.0026146	Activated CD4 T cell	-1		MDSC	4.10328	IFNG	1
CXCL5	-0.0025507	Activated CD4 T cell	-1		Natural killer T cell	-2.66543	IFNG	-1
CXCL13	-0.0021236	Activated CD4 T cell	-1		Plasmacytoid dendritic cell	-3.04811	IFNG	-1
CXCL10	0.0025942	Activated CD4 T cell	1		Regulatory T cell	-3.20401	IFNG	-1
CCL4	0.0017108	Activated CD4 T cell	1		T follicular helper cell	2.0253	IFNG	1
CCL21	-0.0021289	Activated CD4 T cell	-1		Type 17 T helper cell	-2.95318	IFNG	-1
CCL20	0.0026602	Activated CD4 T cell	1		Type 2 T helper cell	2.60877	IFNG	1
PPBP	-0.0028292	Activated CD8 T cell	-1		Central memory CD4 T cell	2.92386	IL1A	1
CXCL13	-0.0015274	Activated CD8 T cell	-1		Eosinophil	7.05365	IL1A	1
CCL3	-0.0023925	Activated CD8 T cell	-1		Natural killer T cell	-2.56675	IL1A	-1
CCL28	0.0043817	Activated CD8 T cell	1		Plasmacytoid dendritic cell	-5.28572	IL1A	-1
CCL24	0.0021352	Activated CD8 T cell	1		Regulatory T cell	-3.02093	IL1A	-1
CCL20	-0.0031515	Activated CD8 T cell	-1		CD56bright natural killer cell	0.594597	IL1B	1
CCL1	0.00066831	Activated CD8 T cell	1		CD56dim natural killer cell	1.46676	IL1B	1
XCL2	0.0011667	Activated dendritic cell	1		Central memory CD4 T cell	0.235051	IL1B	1
PPBP	0.0013739	Activated dendritic cell	1		Central memory CD8 T cell	-0.114174	IL1B	-1
CXCL2	0.00032502	Activated dendritic cell	1		Effector memeory CD4 T cell	-0.273164	IL1B	-1
CXCL13	0.00067067	Activated dendritic cell	1		Effector memeory CD8 T cell	0.966557	IL1B	1
CCL3	0.0010964	Activated dendritic cell	1		Eosinophil	0.353737	IL1B	1
CCL21	0.0012681	Activated dendritic cell	1		Gamma delta T cell	-0.391842	IL1B	-1
CCL18	0.0010898	Activated dendritic cell	1		Immature B cell	0.519595	IL1B	1
PPBP	-0.0035169	CD56bright natural killer cell	-1		Immature dendritic cell	0.61444	IL1B	1
PF4	-0.0035098	CD56bright natural killer cell	-1		Macrophage	0.502637	IL1B	1
CXCL6	0.0032717	CD56bright natural killer cell	1		Mast cell	-0.70436	IL1B	-1
CXCL2	-0.0026804	CD56bright natural killer cell	-1		MDSC	0.582963	IL1B	1
CXCL13	-0.0024134	CD56bright natural killer cell	-1		Activated dendritic cell	2.42213	IL2	1
CXCL12	-0.0028282	CD56bright natural killer cell	-1		CD56dim natural killer cell	3.38751	IL2	1
CCL26	-0.0037083	CD56bright natural killer cell	-1		Central memory CD8 T cell	-2.41944	IL2	-1
CCL2	-0.0028436	CD56bright natural killer cell	-1		Effector memeory CD4 T cell	2.09187	IL2	1
CCL19	0.0035053	CD56bright natural killer cell	1		Eosinophil	-1.79539	IL2	-1
CCL18	0.0030707	CD56bright natural killer cell	1		Gamma delta T cell	-2.53228	IL2	-1
CCL15	0.0028035	CD56bright natural killer cell	1		Immature B cell	2.71349	IL2	1
CCL14	0.0027032	CD56bright natural killer cell	1		MDSC	3.09656	IL2	1
CXCL2	-0.024343	CD56dim natural killer cell	-1		Neutrophil	2.16074	IL2	1
CXCL16	0.015409	CD56dim natural killer cell	1		T follicular helper cell	-2.01551	IL2	-1
CCL5	0.025542	CD56dim natural killer cell	1		Effector memeory CD4 T cell	1.69461	IL3	1
CCL4	0.017825	CD56dim natural killer cell	1		Eosinophil	-2.44667	IL3	-1
CCL3	-0.012183	CD56dim natural killer cell	-1		Immature B cell	2.79633	IL3	1
CCL1	0.03387	CD56dim natural killer cell	1		Mast cell	-3.73302	IL3	-1
XCL2	0.00123	Central memory CD4 T cell	1		MDSC	-1.63795	IL3	-1
XCL1	-0.00034844	Central memory CD4 T cell	-1		Natural killer cell	1.82615	IL3	1
CXCL6	0.00089745	Central memory CD4 T cell	1		Plasmacytoid dendritic cell	3.14782	IL3	1
CXCL13	0.0005775	Central memory CD4 T cell	1		Regulatory T cell	3.06319	IL3	1
CXCL11	0.00040317	Central memory CD4 T cell	1		Type 2 T helper cell	1.06291	IL3	1
CCL28	0.00081033	Central memory CD4 T cell	1		CD56bright natural killer cell	0.963457	IL4	1
CCL24	0.00092446	Central memory CD4 T cell	1		CD56dim natural killer cell	1.59088	IL4	1
CCL21	0.0014232	Central memory CD4 T cell	1		Effector memeory CD4 T cell	-0.403884	IL4	-1
CCL18	0.0013447	Central memory CD4 T cell	1		Effector memeory CD8 T cell	0.841773	IL4	1
CCL15	0.0017687	Central memory CD4 T cell	1		Macrophage	0.824632	IL4	1
CCL13	-0.00038729	Central memory CD4 T cell	-1		Mast cell	-0.742613	IL4	-1
XCL1	0.00045323	Central memory CD8 T cell	1		MDSC	0.677233	IL4	1
PPBP	-0.001841	Central memory CD8 T cell	-1		Regulatory T cell	-0.878018	IL4	-1
CXCL11	0.00060599	Central memory CD8 T cell	1		Type 2 T helper cell	0.57253	IL4	1
CCL8	0.00064536	Central memory CD8 T cell	1		Activated B cell	3.09622	IL5	1
CCL5	0.00042212	Central memory CD8 T cell	1		Activated CD8 T cell	-3.70194	IL5	-1
CCL3	-0.00075079	Central memory CD8 T cell	-1		Effector memeory CD8 T cell	4.64163	IL5	1
CCL26	-0.00093009	Central memory CD8 T cell	-1		Macrophage	4.54912	IL5	1
CCL21	-0.001483	Central memory CD8 T cell	-1		Natural killer cell	-5.99154	IL5	-1
CCL2	-0.0016128	Central memory CD8 T cell	-1		Natural killer T cell	3.31509	IL5	1
CCL18	-0.0015542	Central memory CD8 T cell	-1		Type 17 T helper cell	-4.278	IL5	-1
CCL15	-0.0013101	Central memory CD8 T cell	-1		CD56bright natural killer cell	3.22008	IL6	1
XCL2	-0.0036338	Effector memeory CD4 T cell	-1		Eosinophil	-4.90722	IL6	-1
CCL8	-0.0069878	Effector memeory CD4 T cell	-1		Gamma delta T cell	8.3281	IL6	1
CCL5	-0.010653	Effector memeory CD4 T cell	-1		Memory B cell	-4.1904	IL6	-1
CCL3	0.0090566	Effector memeory CD4 T cell	1		Monocyte	-8.0242	IL6	-1
CCL24	-0.0046093	Effector memeory CD4 T cell	-1		Neutrophil	-4.83432	IL6	-1
XCL2	0.0019868	Effector memeory CD8 T cell	1		Activated CD4 T cell	1.30631	IL7	1
CXCL2	-0.00075385	Effector memeory CD8 T cell	-1		Activated CD8 T cell	1.15233	IL7	1
CX3CL1	-0.00071797	Effector memeory CD8 T cell	-1		CD56dim natural killer cell	1.95441	IL7	1
CCL8	0.00052871	Effector memeory CD8 T cell	1		Gamma delta T cell	-1.37057	IL7	-1
CCL4	0.00058468	Effector memeory CD8 T cell	1		Macrophage	1.08863	IL7	1
CCL28	0.0025475	Effector memeory CD8 T cell	1		Mast cell	-1.76655	IL7	-1
CCL19	0.0015515	Effector memeory CD8 T cell	1		MDSC	1.91746	IL7	1
CCL15	0.0030109	Effector memeory CD8 T cell	1		Memory B cell	-1.37658	IL7	-1
CCL1	0.0003526	Effector memeory CD8 T cell	1		Neutrophil	1.86215	IL7	1
XCL2	0.0040559	Eosinophil	1		T follicular helper cell	-1.02451	IL7	-1
CXCL11	0.0071319	Eosinophil	1		Activated B cell	6.12592	IL11	1
CXCL10	-0.0048587	Eosinophil	-1		Activated CD8 T cell	-9.12351	IL11	-1
CX3CL1	0.012626	Eosinophil	1		CD56dim natural killer cell	-7.07818	IL11	-1
CCL8	0.0093625	Eosinophil	1		Central memory CD4 T cell	-8.47664	IL11	-1
CCL5	0.0064174	Eosinophil	1		Eosinophil	-8.18902	IL11	-1
CCL4	-0.0053673	Eosinophil	-1		Immature dendritic cell	-9.52667	IL11	-1
CCL3	0.0049158	Eosinophil	1		MDSC	-7.08526	IL11	-1
CCL13	-0.0072983	Eosinophil	-1		Natural killer cell	-8.10532	IL11	-1
XCL2	-0.0033614	Gamma delta T cell	-1		Natural killer T cell	12.8105	IL11	1
CCL8	-0.002002	Gamma delta T cell	-1		Regulatory T cell	9.22541	IL11	1
CCL5	-0.0024193	Gamma delta T cell	-1		Effector memeory CD4 T cell	3.42795	IL12A	1
CCL28	-0.0057078	Gamma delta T cell	-1		Effector memeory CD8 T cell	-4.32992	IL12A	-1
CCL21	0.005361	Gamma delta T cell	1		Eosinophil	-4.71325	IL12A	-1
CCL20	0.0040223	Gamma delta T cell	1		Immature dendritic cell	4.39553	IL12A	1
CCL18	0.0029038	Gamma delta T cell	1		MDSC	4.88523	IL12A	1
CCL14	0.0021623	Gamma delta T cell	1		Natural killer cell	6.02327	IL12A	1
CCL13	0.0044578	Gamma delta T cell	1		Type 1 T helper cell	3.30126	IL12A	1
XCL2	0.0014379	Immature B cell	1		Type 2 T helper cell	-4.59353	IL12A	-1
XCL1	-0.00058593	Immature B cell	-1		Activated B cell	-3.36341	IL12B	-1
PPBP	0.0028809	Immature B cell	1		Activated dendritic cell	4.16508	IL12B	1
PF4	0.00074478	Immature B cell	1		CD56bright natural killer cell	-3.11376	IL12B	-1
CXCL13	0.00062488	Immature B cell	1		Effector memeory CD4 T cell	4.64577	IL12B	1
CCL5	-0.00048514	Immature B cell	-1		Gamma delta T cell	4.91515	IL12B	1
CCL25	-0.0005481	Immature B cell	-1		Macrophage	-3.73259	IL12B	-1
CCL21	0.0012168	Immature B cell	1		Mast cell	-3.13924	IL12B	-1
CCL20	0.00229	Immature B cell	1		MDSC	-6.19528	IL12B	-1
CCL2	0.00098599	Immature B cell	1		Monocyte	4.4843	IL12B	1
CCL19	0.001859	Immature B cell	1		Natural killer T cell	-3.34478	IL12B	-1
CCL18	0.0020518	Immature B cell	1		T follicular helper cell	3.43734	IL12B	1
CCL17	-0.0021381	Immature B cell	-1		Type 1 T helper cell	-5.09434	IL12B	-1
CCL15	0.0020959	Immature B cell	1		Gamma delta T cell	-7.54165	IL13	-1
XCL1	-0.00052727	Immature dendritic cell	-1		Natural killer T cell	-16.0644	IL13	-1
PPBP	-0.0028676	Immature dendritic cell	-1		Plasmacytoid dendritic cell	10.7645	IL13	1
CXCL6	0.00099167	Immature dendritic cell	1		Type 17 T helper cell	9.09647	IL13	1
CXCL3	0.00064026	Immature dendritic cell	1		Type 2 T helper cell	-11.0372	IL13	-1
CXCL2	-0.0006227	Immature dendritic cell	-1		Central memory CD4 T cell	-4.22656	IL15	-1
CXCL1	0.0019392	Immature dendritic cell	1		Effector memeory CD4 T cell	4.71427	IL15	1
CX3CL1	-0.00083887	Immature dendritic cell	-1		Mast cell	-7.15729	IL15	-1
CCL8	-0.00059899	Immature dendritic cell	-1		Natural killer T cell	9.21408	IL15	1
CCL4	0.00048485	Immature dendritic cell	1		Regulatory T cell	8.92585	IL15	1
CCL3	-0.0015046	Immature dendritic cell	-1		Type 1 T helper cell	-3.49373	IL15	-1
CCL28	0.0017171	Immature dendritic cell	1		Activated dendritic cell	-0.623826	IL16	-1
CCL18	0.0016637	Immature dendritic cell	1		Immature B cell	-0.98838	IL16	-1
CCL15	0.002763	Immature dendritic cell	1		Immature dendritic cell	-0.954711	IL16	-1
CCL14	0.00068651	Immature dendritic cell	1		Memory B cell	-1.60767	IL16	-1
CCL13	0.00064081	Immature dendritic cell	1		Plasmacytoid dendritic cell	-1.75836	IL16	-1
PPBP	-0.0042118	Macrophage	-1		Regulatory T cell	-1.4659	IL16	-1
PF4	-0.0013926	Macrophage	-1		Type 17 T helper cell	-1.09004	IL16	-1
CXCL2	-0.0017006	Macrophage	-1		Type 2 T helper cell	0.638262	IL16	1
CXCL13	-0.0018041	Macrophage	-1		Activated dendritic cell	3.11877	IL17A	1
CCL4	0.00089665	Macrophage	1		Immature B cell	5.64537	IL17A	1
CCL3	-0.0041817	Macrophage	-1		Plasmacytoid dendritic cell	7.797	IL17A	1
CCL26	-0.0018184	Macrophage	-1		Type 17 T helper cell	12.6211	IL17A	1
CCL15	0.0030444	Macrophage	1		Activated CD4 T cell	2.98122	IL17B	1
CCL14	0.0017601	Macrophage	1		CD56dim natural killer cell	5.10402	IL17B	1
CCL1	0.0006705	Macrophage	1		Immature B cell	-4.01601	IL17B	-1
CXCL5	0.0041289	Mast cell	1		Mast cell	-3.37845	IL17B	-1
CXCL2	0.009582	Mast cell	1		Memory B cell	-3.17387	IL17B	-1
CCL3	-0.015262	Mast cell	-1		Natural killer T cell	2.93454	IL17B	1
CXCL1	0.003663	MDSC	1		Plasmacytoid dendritic cell	-3.25399	IL17B	-1
CCL3	-0.0048559	MDSC	-1		T follicular helper cell	-1.78434	IL17B	-1
CCL26	-0.00369525	MDSC	-1		Type 17 T helper cell	-2.04743	IL17B	-1
XCL2	0.004422	Memory B cell	1		Eosinophil	-4.12993	IL17C	-1
PPBP	0.002915	Memory B cell	1		Macrophage	2.12657	IL17C	1
PF4	0.0027198	Memory B cell	1		Monocyte	-2.40582	IL17C	-1
CXCL3	0.0017077	Memory B cell	1		Natural killer T cell	2.06938	IL17C	1
CXCL2	0.0018884	Memory B cell	1		Regulatory T cell	1.82643	IL17C	1
CXCL13	0.0033352	Memory B cell	1		Activated CD8 T cell	0.792048	IL17D	1
CCL3	0.0037128	Memory B cell	1		Activated dendritic cell	-0.479352	IL17D	-1
CCL21	0.0070409	Memory B cell	1		CD56bright natural killer cell	1.21144	IL17D	1
CCL2	0.0047319	Memory B cell	1		CD56dim natural killer cell	2.35149	IL17D	1
CCL15	-0.0023588	Memory B cell	-1		Eosinophil	-1.65725	IL17D	-1
PF4	0.0018105	Monocyte	1		Immature dendritic cell	0.892846	IL17D	1
CXCL3	0.0012054	Monocyte	1		Macrophage	1.64868	IL17D	1
CXCL13	0.0021843	Monocyte	1		Memory B cell	-2.02706	IL17D	-1
CXCL11	0.0016197	Monocyte	1		Natural killer cell	0.576651	IL17D	1
CCL3	0.0021191	Monocyte	1		T follicular helper cell	-0.649405	IL17D	-1
CCL2	0.0027959	Monocyte	1		Type 2 T helper cell	0.760812	IL17D	1
CCL15	-0.0036315	Monocyte	-1		Activated dendritic cell	1.40607	IL17F	1
CCL13	-0.0016586	Monocyte	-1		Central memory CD4 T cell	2.53432	IL17F	1
XCL1	-0.0011463	Natural killer cell	-1		Effector memeory CD8 T cell	3.51073	IL17F	1
PPBP	-0.0018868	Natural killer cell	-1		Memory B cell	5.98349	IL17F	1
CXCL6	0.001488	Natural killer cell	1		Monocyte	-2.43333	IL17F	-1
CXCL11	-0.0013185	Natural killer cell	-1		Natural killer cell	3.2858	IL17F	1
CCL8	-0.001131	Natural killer cell	-1		Natural killer T cell	-4.19658	IL17F	-1
CCL4	0.00096097	Natural killer cell	1		Neutrophil	-1.77043	IL17F	-1
CCL26	0.001957	Natural killer cell	1		Plasmacytoid dendritic cell	3.46662	IL17F	1
CCL21	0.0022446	Natural killer cell	1		Type 17 T helper cell	3.69899	IL17F	1
CCL18	0.0034533	Natural killer cell	1		Activated CD4 T cell	1.24235	IL18	1
CCL17	-0.0022426	Natural killer cell	-1		CD56dim natural killer cell	1.17704	IL18	1
CCL15	0.0018114	Natural killer cell	1		Effector memeory CD4 T cell	1.45178	IL18	1
CCL14	0.0016352	Natural killer cell	1		Eosinophil	-3.21292	IL18	-1
XCL2	-0.003479	Natural killer T cell	-1		Monocyte	-1.07297	IL18	-1
CXCL3	0.0056508	Natural killer T cell	1		Plasmacytoid dendritic cell	1.3722	IL18	1
CX3CL1	0.0086285	Natural killer T cell	1		Regulatory T cell	1.48566	IL18	1
CCL8	-0.0068947	Natural killer T cell	-1		Type 17 T helper cell	1.36059	IL18	1
CCL5	-0.00846	Natural killer T cell	-1		Activated CD4 T cell	0.789207	IL19	1
CCL21	-0.0049504	Natural killer T cell	-1		Central memory CD4 T cell	-1.07869	IL19	-1
CCL18	-0.0039613	Natural killer T cell	-1		Eosinophil	-1.20851	IL19	-1
CCL1	0.0062721	Natural killer T cell	1		Immature B cell	-0.68137	IL19	-1
CCL21	-0.0013245	Neutrophil	-1		Memory B cell	-1.71324	IL19	-1
CCL15	-0.0022005	Neutrophil	-1		Natural killer cell	-0.616088	IL19	-1
XCL1	-0.0042844	Plasmacytoid dendritic cell	-1		Natural killer T cell	1.28546	IL19	1
PF4	0.0041353	Plasmacytoid dendritic cell	1		Regulatory T cell	1.25215	IL19	1
CXCL9	0.0035649	Plasmacytoid dendritic cell	1		T follicular helper cell	-0.594551	IL19	-1
CXCL11	-0.0062554	Plasmacytoid dendritic cell	-1		Central memory CD4 T cell	-1.75653	IL20	-1
CX3CL1	-0.005122	Plasmacytoid dendritic cell	-1		Central memory CD8 T cell	-1.52872	IL20	-1
CCL5	-0.0059105	Plasmacytoid dendritic cell	-1		Effector memeory CD4 T cell	3.34223	IL20	1
CCL25	-0.0052692	Plasmacytoid dendritic cell	-1		Eosinophil	-3.93736	IL20	-1
CCL14	0.0052307	Plasmacytoid dendritic cell	1		Natural killer T cell	2.20559	IL20	1
CCL13	0.0058233	Plasmacytoid dendritic cell	1		Plasmacytoid dendritic cell	1.9358	IL20	1
PPBP	0.00311	Regulatory T cell	1		Regulatory T cell	1.98753	IL20	1
CXCL13	-0.0029249	Regulatory T cell	-1		T follicular helper cell	-1.11722	IL20	-1
CXCL11	-0.0093225	Regulatory T cell	-1		Activated B cell	1.67	IL21	1
CX3CL1	-0.0046265	Regulatory T cell	-1		Central memory CD4 T cell	-2.63959	IL21	-1
CCL8	-0.007035	Regulatory T cell	-1		Effector memeory CD8 T cell	2.24885	IL21	1
CCL5	-0.0054313	Regulatory T cell	-1		Immature B cell	2.31035	IL21	1
CCL4	0.0024434	Regulatory T cell	1		Macrophage	2.35587	IL21	1
CCL13	0.0029485	Regulatory T cell	1		Natural killer cell	-2.10816	IL21	-1
PF4	0.00046133	T follicular helper cell	1		Natural killer T cell	2.72874	IL21	1
CXCL13	0.00061336	T follicular helper cell	1		Plasmacytoid dendritic cell	2.88131	IL21	1
CXCL11	0.00040134	T follicular helper cell	1		Activated CD4 T cell	2.49566	IL22	1
CX3CL1	-0.00039202	T follicular helper cell	-1		Effector memeory CD4 T cell	1.59156	IL22	1
CCL24	0.00084722	T follicular helper cell	1		Eosinophil	-4.24407	IL22	-1
CCL21	0.00082809	T follicular helper cell	1		Immature B cell	-2.72485	IL22	-1
CCL17	0.0013821	T follicular helper cell	1		Monocyte	-1.74084	IL22	-1
CCL15	0.0013751	T follicular helper cell	1		Natural killer cell	1.98043	IL22	1
XCL2	0.0021869	Type 1 T helper cell	1		T follicular helper cell	-1.55821	IL22	-1
XCL1	-0.0044337	Type 1 T helper cell	-1		Type 2 T helper cell	-1.62919	IL22	-1
PF4	-0.0035243	Type 1 T helper cell	-1		Activated B cell	-8.37661	IL23A	-1
CXCL9	-0.0032207	Type 1 T helper cell	-1		MDSC	-6.79106	IL23A	-1
CCL3	-0.0037606	Type 1 T helper cell	-1		Natural killer T cell	-11.7742	IL23A	-1
CCL2	0.0027488	Type 1 T helper cell	1		Regulatory T cell	6.31199	IL23A	1
CCL16	0.0038733	Type 1 T helper cell	1		Type 17 T helper cell	14.2926	IL23A	1
CCL14	0.0037087	Type 1 T helper cell	1		Type 2 T helper cell	7.27441	IL23A	1
PPBP	-0.0019573	Type 2 T helper cell	-1		Central memory CD4 T cell	0.996274	IL24	1
CXCL5	0.0018702	Type 2 T helper cell	1		Effector memeory CD4 T cell	-1.09761	IL24	-1
CXCL13	-0.00083655	Type 2 T helper cell	-1		Effector memeory CD8 T cell	1.66183	IL24	1
CCL3	-0.00070389	Type 2 T helper cell	-1		Eosinophil	2.60793	IL24	1
CCL22	-0.00086865	Type 2 T helper cell	-1		Gamma delta T cell	-1.32917	IL24	-1
CCL21	-0.0019763	Type 2 T helper cell	-1		Monocyte	0.998686	IL24	1
CCL2	-0.002095	Type 2 T helper cell	-1		Natural killer T cell	-1.36165	IL24	-1
CCL1	0.00022323	Type 2 T helper cell	1		T follicular helper cell	0.815379	IL24	1
					Type 2 T helper cell	0.793273	IL24	1
					Activated dendritic cell	2.30208	IL25	1
					Central memory CD4 T cell	2.28729	IL25	1
					Central memory CD8 T cell	-3.74545	IL25	-1
					Immature dendritic cell	3.32932	IL25	1
					MDSC	2.4047	IL25	1
					Memory B cell	2.73723	IL25	1
					Natural killer cell	3.25912	IL25	1
					Natural killer T cell	-3.24826	IL25	-1
					Activated CD8 T cell	0.555646	IL26	1
					CD56bright natural killer cell	0.864586	IL26	1
					CD56dim natural killer cell	1.88678	IL26	1
					Effector memeory CD4 T cell	-0.678664	IL26	-1
					Effector memeory CD8 T cell	1.06879	IL26	1
					Eosinophil	1.36488	IL26	1
					Immature dendritic cell	0.677507	IL26	1
					Natural killer T cell	-0.896317	IL26	-1
					Regulatory T cell	-1.09381	IL26	-1
					Type 2 T helper cell	0.904427	IL26	1
					CD56bright natural killer cell	0.503843	IL27	1
					Eosinophil	-1.37805	IL27	-1
					Immature B cell	0.968869	IL27	1
					Macrophage	0.902588	IL27	1
					Type 2 T helper cell	0.621863	IL27	1
					CD56bright natural killer cell	1.97229	IL31	1
					CD56dim natural killer cell	3.32412	IL31	1
					Effector memeory CD4 T cell	3.02634	IL31	1
					Eosinophil	-5.09675	IL31	-1
					Gamma delta T cell	2.4101	IL31	1
					Mast cell	-3.50551	IL31	-1
					Plasmacytoid dendritic cell	4.26018	IL31	1
					Regulatory T cell	5.72993	IL31	1
					T follicular helper cell	-1.58477	IL31	-1
					Type 1 T helper cell	-1.35848	IL31	-1
					Type 17 T helper cell	3.83594	IL31	1
					Activated B cell	-1.45478	IL32	-1
					Activated CD8 T cell	1.12561	IL32	1
					CD56bright natural killer cell	-1.00896	IL32	-1
					Central memory CD4 T cell	-1.52592	IL32	-1
					Gamma delta T cell	-1.68312	IL32	-1
					Immature B cell	-1.64347	IL32	-1
					Immature dendritic cell	-1.43519	IL32	-1
					Memory B cell	-4.3403	IL32	-1
					Monocyte	1.49121	IL32	1
					Natural killer cell	-2.20497	IL32	-1
					Natural killer T cell	2.56992	IL32	1
					Plasmacytoid dendritic cell	-2.8832	IL32	-1
					Type 1 T helper cell	-0.769613	IL32	-1
					Type 17 T helper cell	-2.27263	IL32	-1
					Activated B cell	-2.80347	IL33	-1
					Activated CD8 T cell	1.9561	IL33	1
					CD56dim natural killer cell	4.18727	IL33	1
					Gamma delta T cell	-1.75801	IL33	-1
					MDSC	2.70441	IL33	1
					Memory B cell	-6.12853	IL33	-1
					Monocyte	2.63058	IL33	1
					Natural killer cell	-2.16284	IL33	-1
					Type 2 T helper cell	2.05595	IL33	1
					Activated CD8 T cell	2.5136	IL34	1
					CD56dim natural killer cell	2.01559	IL34	1
					MDSC	2.87546	IL34	1
					Memory B cell	-1.86673	IL34	-1
					Monocyte	2.61942	IL34	1
					Natural killer T cell	1.72824	IL34	1
					Activated dendritic cell	4.27551	TXLNA	1
					Central memory CD8 T cell	-5.46738	TXLNA	-1
					Mast cell	-4.64829	TXLNA	-1
					MDSC	-5.15069	TXLNA	-1
					Memory B cell	5.0606	TXLNA	1
					Monocyte	-4.44589	TXLNA	-1
					Natural killer T cell	-4.59685	TXLNA	-1
					Regulatory T cell	7.45516	TXLNA	1
