# Supplementary material for: Infiltration of Immunoinflammatory Cells and Related Chemokine/Interleukin Expression in Different Gastric Immune Microenvironments
Source: J Immunol Res. 2020 Dec 23;2020:2450569. doi: 10.1155/2020/2450569 (PMC7774301; doi:10.1155/2020/2450569)
Supplement: Supplementary 10 — Table S8-1-1: the results of the correlation between chemokines and immune cells from NGM to SG by PLSR. Table S8-1-2: the results of the correlation between immune cells and interleukins from NGM to SG by PLSR. Table S8-2-1: the results of the correlation between chemokines and immune cells from SG to AG by PLSR. Table S8-2-2: the results of the correlation between immune cells and interleukins from SG to AG by PLSR. Table S8-3-1: the results of the correlation between chemokines and immune cells from AG to EAG by PLSR. Table S8-3-2: the results of the correlation between immune cells and interleukins from AG to EAG by PLSR. Table S8-4-1: the results of the correlation between chemokines and immune cells from EAG to T1/2 by PLSR. Table S8-4-2: the results of the correlation between immune cells and interleukins from EAG to T1/2 by PLSR. Table S8-5-1: the results of the correlation between chemokines and immune cells from T1/2 to T3/4 by PLSR. Table S8-5-2: the results of the correlation between immune cells and interleukins from T1/2 to T3/4 by PLSR. [file 2450569.f10.xlsx]

## Sheet: NGM to SG
Table S8-1-1 The results of correlation between chemokines and immune cells from NGM to SG by PLSR							Table S8-1-2 The results of correlation between immune cells and interleukins from NGM to SG by PLSR
Chemokine	Estimate	Immune Cell	Sign				Immune Cell	Estimate	Interleukin	Sign
XCL2	0.00372065	Activated B cell	1				Activated B cell	-11.1861	IL1A	-1
PF4	0.00133243	Activated B cell	1				Activated CD4 T cell	5.97025	IL1A	1
CXCL5	0.00375717	Activated B cell	1	*			Mast cell	-8.05906	IL1A	-1
CXCL13	0.0131272	Activated B cell	1	*			Neutrophil	5.40561	IL1A	1
CCL8	0.0054515	Activated B cell	1	*			Natural killer cell	7.13156	IL1B	1
CCL21	0.0119382	Activated B cell	1				Natural killer T cell	-1.98077	IL3	-1
CCL20	0.0065296	Activated B cell	1	*			Natural killer T cell	-0.883475	IL4	-1
CCL19	0.00732846	Activated B cell	1				CD56bright natural killer cell	-2.4353	IL5	-1
CXCL5	0.0080666	Activated CD4 T cell	1	*			Activated B cell	3.28963	IL10	1	*
CXCL3	0.0052332	Activated CD4 T cell	1				Activated CD4 T cell	1.90527	IL10	1	*
CXCL2	0.0021314	Activated CD4 T cell	1	*			Activated CD8 T cell	0.662188	IL10	1	*
CXCL13	0.0025807	Activated CD4 T cell	1	*			Activated dendritic cell	1.0848	IL10	1	*
CXCL11	0.0027923	Activated CD4 T cell	1				Central memory CD8 T cell	0.400481	IL10	1
CXCL10	0.0032571	Activated CD4 T cell	1				Effector memeory CD8 T cell	1.40517	IL10	1	*
CXCL1	0.0035445	Activated CD4 T cell	1	*			Immature B cell	3.12958	IL10	1	*
CCL5	0.0014524	Activated CD4 T cell	1				MDSC	2.13358	IL10	1	*
CCL28	0.002554	Activated CD4 T cell	1				Memory B cell	0.971749	IL10	1	*
CCL20	0.0062901	Activated CD4 T cell	1	*			Neutrophil	0.835145	IL10	1
CXCL10	0.002509	Activated CD8 T cell	1				Regulatory T cell	1.67047	IL10	1	*
CXCL9	0.001935	Activated dendritic cell	1				Type 1 T helper cell	0.583524	IL10	1	*
CXCL5	0.0047007	Activated dendritic cell	1	*			Activated B cell	0.742419	IL7	1	*
CXCL3	0.002688	Activated dendritic cell	1				Regulatory T cell	0.396944	IL7	1	*
CXCL2	0.001795	Activated dendritic cell	1	*			Memory B cell	0.569515	IL11	1
CXCL14	0.00094831	Activated dendritic cell	1				Activated B cell	2.14332	IL12A	1
CXCL11	0.0029242	Activated dendritic cell	1				Activated CD4 T cell	1.08528	IL12A	1
CXCL10	0.002964	Activated dendritic cell	1				Activated dendritic cell	0.609666	IL12A	1
CXCL1	0.0021646	Activated dendritic cell	1	*			Effector memeory CD8 T cell	0.834001	IL12A	1
CCL5	0.0010893	Activated dendritic cell	1				Memory B cell	0.592994	IL12A	1
CCL28	0.0010799	Activated dendritic cell	1				Regulatory T cell	0.997616	IL12A	1
CCL20	0.0034048	Activated dendritic cell	1	*			Type 1 T helper cell	0.341916	IL12A	1
XCL1	-0.00076886	CD56bright natural killer cell	-1				Activated CD4 T cell	0.977589	IL12B	1
CXCL1	0.00099816	CD56bright natural killer cell	1				Gamma delta T cell	-2.37149	IL13	-1
CCL28	0.0003912	CD56bright natural killer cell	1				Immature dendritic cell	-2.66877	IL13	-1
CCL22	0.0007559	CD56bright natural killer cell	1				Natural killer T cell	-1.22247	IL13	-1
CCL19	-0.00196224	CD56bright natural killer cell	-1				Central memory CD4 T cell	-1.3262	IL15	-1
CCL15	-0.00182801	CD56bright natural killer cell	-1				MDSC	-6.07344	IL15	-1
CCL15	-0.00394063	CD56dim natural killer cell	-1				Natural killer cell	6.25788	IL15	1
CXCL2	0.00085277	Central memory CD4 T cell	1				Natural killer T cell	2.11822	IL15	1
CX3CL1	0.00229094	Central memory CD4 T cell	1				Type 17 T helper cell	5.18133	IL15	1
CCL5	0.00084747	Central memory CD4 T cell	1				Activated B cell	5.0718	IL16	1
CXCL5	0.00199	Central memory CD8 T cell	1				Immature dendritic cell	-2.44664	IL16	-1
CXCL2	0.00068652	Central memory CD8 T cell	1				Regulatory T cell	1.18707	IL16	1
CCL28	0.00090913	Central memory CD8 T cell	1				Activated B cell	2.91548	IL17A	1
CCL20	0.0016316	Central memory CD8 T cell	1				Activated CD4 T cell	1.55637	IL17A	1
CCL2	0.00113998	Effector memeory CD4 T cell	1				Effector memeory CD8 T cell	1.14037	IL17A	1
CCL13	0.00414452	Effector memeory CD4 T cell	1				Immature B cell	2.7698	IL17A	1
XCL1	0.0012262	Effector memeory CD8 T cell	1	*			MDSC	1.66435	IL17A	1
CXCL9	0.0024973	Effector memeory CD8 T cell	1				Memory B cell	0.609421	IL17A	1
CXCL6	0.0010973	Effector memeory CD8 T cell	1	*			Regulatory T cell	1.1939	IL17A	1
CXCL5	0.0039087	Effector memeory CD8 T cell	1	*			Type 1 T helper cell	0.403673	IL17A	1
CXCL2	0.0022049	Effector memeory CD8 T cell	1	*			Activated dendritic cell	0.417405	IL17B	1
CXCL16	0.00097791	Effector memeory CD8 T cell	1				Natural killer T cell	-1.98077	IL17C	-1
CXCL14	0.0013237	Effector memeory CD8 T cell	1				Activated B cell	1.91477	IL17F	1
CXCL10	0.0030576	Effector memeory CD8 T cell	1				Activated CD4 T cell	1.17109	IL17F	1
CXCL1	0.0033564	Effector memeory CD8 T cell	1	*			Regulatory T cell	0.876733	IL17F	1
CCL8	0.0020268	Effector memeory CD8 T cell	1	*			Type 1 T helper cell	0.238276	IL17F	1
CCL5	0.00094342	Effector memeory CD8 T cell	1				Activated B cell	2.45159	IL19	1
CCL28	0.0010857	Effector memeory CD8 T cell	1				Activated CD4 T cell	1.58761	IL19	1
CCL22	0.002021	Effector memeory CD8 T cell	1	*			Activated dendritic cell	0.928223	IL19	1
CCL20	0.002928	Effector memeory CD8 T cell	1	*			Central memory CD8 T cell	0.380103	IL19	1
CCL18	0.0025534	Effector memeory CD8 T cell	1	*			Effector memeory CD8 T cell	1.18404	IL19	1
CCL28	0.0023907	Eosinophil	1				Eosinophil	0.548734	IL19	1
CXCL6	-0.0023116	Gamma delta T cell	-1				Immature B cell	2.64545	IL19	1
CXCL2	0.0014184	Gamma delta T cell	1				MDSC	1.78259	IL19	1
CXCL14	0.0014217	Gamma delta T cell	1				Memory B cell	0.914789	IL19	1
CXCL11	0.0034457	Gamma delta T cell	1				Neutrophil	0.996843	IL19	1
CXCL10	0.0036644	Gamma delta T cell	1				Regulatory T cell	1.41554	IL19	1
CCL16	-0.0037978	Gamma delta T cell	-1				Type 1 T helper cell	0.460544	IL19	1
CXCL5	0.00841	Immature B cell	1	*			Natural killer T cell	-1.98077	IL20	-1
CXCL13	0.0061857	Immature B cell	1	*			Activated B cell	3.12572	IL21	1
CCL20	0.0078733	Immature B cell	1	*			Activated CD4 T cell	1.78956	IL21	1
CCL13	0.00968	Immature B cell	1				Activated dendritic cell	1.07212	IL21	1
CXCL1	0.0016435	Immature dendritic cell	1				Effector memeory CD8 T cell	1.38757	IL21	1
CCL28	0.0012232	Immature dendritic cell	1				Immature B cell	3.17808	IL21	1
CCL19	-0.0024504	Immature dendritic cell	-1				MDSC	2.07544	IL21	1
CCL14	-0.0042249	Immature dendritic cell	-1				Memory B cell	1.00696	IL21	1
CXCL9	0.0011078	Macrophage	1				Neutrophil	0.941259	IL21	1
CXCL5	0.0018634	Macrophage	1				Regulatory T cell	1.60821	IL21	1
CXCL3	0.00077337	Macrophage	1				Type 1 T helper cell	0.535555	IL21	1
CXCL2	0.0010235	Macrophage	1				Immature B cell	4.04819	IL22	1
CXCL14	0.00065486	Macrophage	1				Natural killer cell	-5.12208	IL22	-1
CXCL11	0.00096537	Macrophage	1				Type 17 T helper cell	-2.4048	IL22	-1
CXCL10	0.0011207	Macrophage	1				Activated B cell	0.882383	IL23A	1
CXCL1	0.0015959	Macrophage	1				Immature B cell	0.729865	IL23A	1
CCL8	0.0013023	Macrophage	1				Regulatory T cell	0.341112	IL23A	1
CCL5	0.00044386	Macrophage	1				Immature B cell	3.83558	IL24	1
CCL4	0.00057715	Macrophage	1				Natural killer cell	-2.17868	IL24	-1
CCL28	0.00054895	Macrophage	1				Natural killer T cell	-2.48247	IL25	-1
CCL22	0.0010377	Macrophage	1				Activated B cell	2.14686	IL27	1
CCL20	0.0015604	Macrophage	1				Activated CD4 T cell	1.04215	IL27	1
CCL2	0.00068822	Macrophage	1				Activated dendritic cell	0.514485	IL27	1
CCL18	0.00139	Macrophage	1				Effector memeory CD8 T cell	0.630177	IL27	1
CXCL12	0.00261362	Mast cell	1				Neutrophil	0.460707	IL27	1
CX3CL1	0.00555226	Mast cell	1				Regulatory T cell	0.991092	IL27	1
CCL24	-0.00608042	Mast cell	-1				Type 1 T helper cell	0.254239	IL27	1
CXCL5	0.0082945	MDSC	1	*			Natural killer T cell	-1.98077	IL31	-1
CCL20	0.00665424	MDSC	1	*			Activated dendritic cell	2.91294	IL32	1	*
CCL13	0.00837195	MDSC	1				Immature B cell	3.42148	IL32	1	*
XCL1	0.0010128	Memory B cell	1	*			Activated B cell	-1.10753	IL33	-1	*
CXCL9	0.000694	Memory B cell	1				Activated CD4 T cell	-0.762048	IL33	-1	*
CXCL6	0.00115	Memory B cell	1	*			Activated dendritic cell	-0.447761	IL33	-1	*
CXCL5	0.00278	Memory B cell	1	*			Central memory CD8 T cell	-0.163379	IL33	-1
CXCL3	0.00119	Memory B cell	1				Effector memeory CD8 T cell	-0.559682	IL33	-1	*
CXCL2	0.000857	Memory B cell	1	*			Immature B cell	-1.19222	IL33	-1	*
CXCL13	0.0018755	Memory B cell	1	*			MDSC	-0.808844	IL33	-1	*
CXCL1	0.0018436	Memory B cell	1	*			Memory B cell	-0.366063	IL33	-1	*
CCL8	0.0012331	Memory B cell	1	*			Neutrophil	-0.418323	IL33	-1
CCL4	0.00039937	Memory B cell	1				Regulatory T cell	-0.589473	IL33	-1	*
CCL3	0.00091071	Memory B cell	1				Type 1 T helper cell	-0.201409	IL33	-1	*
CCL28	0.00045886	Memory B cell	1				Regulatory T cell	0.98011	IL34	1
CCL22	0.0010998	Memory B cell	1	*			Eosinophil	0.456002	IL34	1
CCL20	0.0020449	Memory B cell	1	*			Immature B cell	1.80855	IL34	1
CCL13	0.0012636	Memory B cell	1				Regulatory T cell	0.98011	IL34	1
XCL1	0.00027615	Monocyte	1				Central memory CD8 T cell	0.489409	IL14	1
CXCL2	0.00034637	Monocyte	1				* Statistically significant immune cells and interleukins in NGM to SG
CXCL13	0.00067369	Monocyte	1
CXCL10	0.00055591	Monocyte	1
CX3CL1	0.00045653	Monocyte	1
CCL22	0.00023724	Monocyte	1
CCL18	0.00061724	Monocyte	1
CCL18	0.00424114	Natural killer cell	1
PF4	-0.0015071	Natural killer T cell	-1
CCL2	0.0015613	Natural killer T cell	1
CCL18	0.0020743	Natural killer T cell	1
XCL1	0.00096524	Neutrophil	1
CXCL6	0.00085055	Neutrophil	1
CXCL5	0.0028852	Neutrophil	1
CXCL2	0.0010745	Neutrophil	1
CXCL16	0.00039917	Neutrophil	1
CXCL14	0.00051646	Neutrophil	1
CXCL13	0.0020425	Neutrophil	1
CXCL10	0.0012214	Neutrophil	1
CXCL1	0.0022538	Neutrophil	1
CCL8	0.0011403	Neutrophil	1
CCL3	0.00090379	Neutrophil	1
CCL28	0.00077635	Neutrophil	1
CCL22	0.0012351	Neutrophil	1
CCL20	0.0019973	Neutrophil	1
CCL2	0.00054733	Neutrophil	1
CCL18	0.0018025	Neutrophil	1
CCL13	0.0013621	Neutrophil	1
CXCL2	0.00072932	Plasmacytoid dendritic cell	1
CXCL13	0.0021468	Plasmacytoid dendritic cell	1
CCL8	0.0011335	Plasmacytoid dendritic cell	1
CCL11	0.0012	Plasmacytoid dendritic cell	1
CXCL5	0.0038543	Regulatory T cell	1	*
CXCL1	0.0021811	Regulatory T cell	1	*
CCL20	0.0048446	Regulatory T cell	1	*
CCL2	0.0024064	Regulatory T cell	1
CCL18	0.0045519	Regulatory T cell	1	*
CCL21	0.00325886	T follicular helper cell	1
XCL1	0.00041188	Type 1 T helper cell	1	*
CXCL5	0.0016703	Type 1 T helper cell	1	*
CXCL2	0.00078626	Type 1 T helper cell	1	*
CXCL16	0.00031716	Type 1 T helper cell	1
CXCL13	0.0011813	Type 1 T helper cell	1	*
CXCL1	0.0013318	Type 1 T helper cell	1	*
CCL8	0.00066655	Type 1 T helper cell	1	*
CCL5	0.00032098	Type 1 T helper cell	1
CCL20	0.0011877	Type 1 T helper cell	1	*
CCL2	0.00060613	Type 1 T helper cell	1
CCL18	0.0013482	Type 1 T helper cell	1	*
CXCL9	0.0004896	Type 2 T helper cell	1
CXCL2	0.00059541	Type 2 T helper cell	1	*
CXCL13	0.00077574	Type 2 T helper cell	1	*
CXCL10	0.00048835	Type 2 T helper cell	1
CXCL1	0.0010098	Type 2 T helper cell	1	*
CCL8	0.00063235	Type 2 T helper cell	1	*
CCL5	0.00023739	Type 2 T helper cell	1
CCL4	0.00037836	Type 2 T helper cell	1
CCL22	0.00044271	Type 2 T helper cell	1	*
CCL20	0.00097496	Type 2 T helper cell	1	*
CCL18	0.00090998	Type 2 T helper cell	1	*
CCL28	0.0014605	Type 17 T helper cell	1
CCL14	-0.003599	Type 17 T helper cell	-1
* Statistically significant immune cells and chemokines in NGM to SG

## Sheet: SG to AG
Table S8-2-1 The results of correlation between chemokines and immune cells from SG to AG by PLSR					Table S8-2-2 The results of correlation between immune cells and interleukins from SG to AG by PLSR
Chemokine	Estimate	Immune Cell	Sign		Immune Cell	Estimate	Interleukin	Sign
CXCL13	0.0293503	Activated B cell	1		Activated B cell	-6.34312	IL1A	-1
CXCL16	0.00190707	Activated CD4 T cell	1		Regulatory T cell	-6.54836	IL1A	-1
CXCL13	0.00793923	Activated CD4 T cell	1		Natural killer cell	7.58306	IL1B	1
CXCL1	0.00339676	Activated CD4 T cell	1		Type 17 T helper cell	9.08665	IL1B	1
CCL22	0.00497848	Activated CD4 T cell	1		Central memory CD4 T cell	-1.0539	IL2	-1
CCL19	0.00549146	Activated CD4 T cell	1		Gamma delta T cell	-2.08068	IL2	-1
CCL18	0.00681381	Activated CD4 T cell	1		Immature B cell	2.95089	IL2	1
CCL13	0.00468674	Activated CD4 T cell	1		Immature dendritic cell	-2.11272	IL2	-1
CXCL13	0.00574899	Activated CD8 T cell	1		Macrophage	-1.40342	IL2	-1
CXCL11	0.00513473	Activated CD8 T cell	1		Mast cell	-2.92059	IL2	-1
CXCL10	0.00381843	Activated CD8 T cell	1		MDSC	2.03592	IL2	1
CX3CL1	0.00207501	Activated CD8 T cell	1		Monocyte	-0.5143	IL2	-1
CCL5	0.00184085	Activated CD8 T cell	1		Natural killer T cell	-1.12835	IL2	-1
CCL22	0.00401495	Activated CD8 T cell	1		Central memory CD4 T cell	-1.4468	IL3	-1
CXCL9	0.0018669	Activated dendritic cell	1		Immature dendritic cell	-3.11323	IL3	-1
CXCL16	0.00073048	Activated dendritic cell	1		Macrophage	-1.56404	IL3	-1
CXCL14	0.00046869	Activated dendritic cell	1		Mast cell	-4.33448	IL3	-1
CXCL10	0.002152	Activated dendritic cell	1		Monocyte	-0.96091	IL3	-1
CXCL1	0.00098698	Activated dendritic cell	1		Natural killer T cell	-1.80149	IL3	-1
CCL5	0.00049429	Activated dendritic cell	1		Central memory CD4 T cell	-1.46535	IL4	-1
CCL4	0.00097351	Activated dendritic cell	1		Gamma delta T cell	-2.51773	IL4	-1
CCL28	0.00067972	Activated dendritic cell	1		Macrophage	-1.92996	IL4	-1
CCL26	-0.00089253	Activated dendritic cell	-1		Natural killer T cell	-1.72412	IL4	-1
CCL2	0.00076241	Activated dendritic cell	1		Neutrophil	-2.07642	IL4	-1
CCL18	0.0021603	Activated dendritic cell	1		Natural killer cell	-4.16722	IL6	-1
CCL14	-0.0012294	Activated dendritic cell	-1		Type 17 T helper cell	-3.48284	IL6	-1
PF4	-0.0022222	CD56bright natural killer cell	-1		Activated B cell	0.38275	IL7	1
CCL26	-0.0029926	CD56bright natural killer cell	-1		Activated CD4 T cell	0.185993	IL7	1
CCL14	-0.0042072	CD56bright natural killer cell	-1		Activated CD8 T cell	0.0853421	IL7	1
CCL13	-0.0039897	CD56bright natural killer cell	-1		Effector memeory CD8 T cell	0.107217	IL7	1
CCL1	-0.0016496	CD56bright natural killer cell	-1		Immature B cell	0.453675	IL7	1
CXCL2	0.00077916	CD56dim natural killer cell	1		MDSC	0.267943	IL7	1
CXCL12	0.00054176	CD56dim natural killer cell	1		Memory B cell	0.128452	IL7	1
CCL19	-0.0012383	CD56dim natural killer cell	-1		CD56bright natural killer cell	-2.33731	IL10	-1
CCL17	-0.001136	CD56dim natural killer cell	-1		MDSC	4.96736	IL10	1
CCL11	0.00097557	CD56dim natural killer cell	1		T follicular helper cell	-2.40478	IL10	-1
CXCL16	0.0012578	Central memory CD4 T cell	1		Central memory CD4 T cell	-1.20606	IL11	-1
CXCL14	0.00096634	Central memory CD4 T cell	1		Gamma delta T cell	-1.91951	IL11	-1
CXCL13	0.0019273	Central memory CD4 T cell	1		Immature dendritic cell	-2.24911	IL11	-1
CXCL11	0.0021543	Central memory CD4 T cell	1		Macrophage	-1.45283	IL11	-1
CXCL10	0.0017932	Central memory CD4 T cell	1		Mast cell	-3.43474	IL11	-1
CXCL1	0.0017018	Central memory CD4 T cell	1		Natural killer T cell	-1.64452	IL11	-1
CCL26	-0.0017431	Central memory CD4 T cell	-1		Central memory CD4 T cell	-0.691298	IL12A	-1
CCL25	-0.0013282	Central memory CD4 T cell	-1		Immature B cell	2.18057	IL12A	1
CCL22	0.0016461	Central memory CD4 T cell	1		Immature dendritic cell	-1.83669	IL12A	-1
CCL18	0.0025302	Central memory CD4 T cell	1		MDSC	2.09079	IL12A	1
CCL14	-0.002313	Central memory CD4 T cell	-1		Activated B cell	1.31718	IL12B	1
CXCL9	0.00201549	Central memory CD8 T cell	1		Activated CD4 T cell	0.717986	IL12B	1
CXCL14	0.00081714	Central memory CD8 T cell	1		Immature B cell	1.60666	IL12B	1
CXCL10	0.00224671	Central memory CD8 T cell	1		MDSC	1.13383	IL12B	1
CCL28	0.00085087	Central memory CD8 T cell	1		Memory B cell	0.489102	IL12B	1
CCL26	-0.00147165	Central memory CD8 T cell	-1		Type 1 T helper cell	0.22868	IL12B	1
CCL25	-0.00132149	Central memory CD8 T cell	-1		Central memory CD4 T cell	-1.43798	IL13	-1
CCL23	-0.00106301	Central memory CD8 T cell	-1		Effector memeory CD4 T cell	-0.99492	IL13	-1
CCL16	-0.00099731	Central memory CD8 T cell	-1		Gamma delta T cell	-2.48244	IL13	-1
CCL13	0.00196389	Central memory CD8 T cell	1		Immature dendritic cell	-2.49515	IL13	-1
PPBP	-0.0009345	Effector memeory CD4 T cell	-1		Monocyte	-0.83765	IL13	-1
CCL21	0.00134409	Effector memeory CD4 T cell	1		Neutrophil	-1.4369	IL13	-1
CCL2	0.00070593	Effector memeory CD4 T cell	1		Plasmacytoid dendritic cell	-1.12702	IL13	-1
CXCL9	0.00336277	Effector memeory CD8 T cell	1		Type 2 T helper cell	-1.31846	IL13	-1
CXCL12	-0.00436286	Effector memeory CD8 T cell	-1		Effector memeory CD8 T cell	4.92277	IL15	1
CXCL11	0.00595698	Effector memeory CD8 T cell	1		Natural killer cell	6.62463	IL15	1
CXCL10	0.00622107	Effector memeory CD8 T cell	1		Natural killer T cell	4.5835	IL15	1
CCL17	0.00745344	Effector memeory CD8 T cell	1		Activated B cell	2.88941	IL16	1
CXCL13	0.003346	Eosinophil	1		Immature B cell	2.27521	IL16	1
CCL22	0.0018321	Eosinophil	1		Macrophage	-0.629279	IL16	-1
CCL19	0.0031539	Eosinophil	1		Activated B cell	2.29838	IL17A	1
CCL18	0.0022335	Eosinophil	1		Activated CD4 T cell	0.956023	IL17A	1
CCL17	0.0017782	Eosinophil	1		Activated CD8 T cell	0.542419	IL17A	1
CCL13	0.0020066	Eosinophil	1		Effector memeory CD8 T cell	0.499952	IL17A	1
CXCL16	0.00170399	Gamma delta T cell	1		Immature B cell	2.22494	IL17A	1
CXCL14	0.00183061	Gamma delta T cell	1		MDSC	1.0797	IL17A	1
CXCL10	0.00484831	Gamma delta T cell	1		Memory B cell	0.513151	IL17A	1
CCL26	-0.00463892	Gamma delta T cell	-1		Type 1 T helper cell	0.266294	IL17A	1
CXCL13	0.0165739	Immature B cell	1		Macrophage	-1.21866	IL17B	-1
CCL22	0.00825845	Immature B cell	1		Mast cell	-2.87008	IL17B	-1
CCL19	0.0137751	Immature B cell	1		Natural killer T cell	-1.07235	IL17B	-1
PF4	-0.0017984	Immature dendritic cell	-1		Central memory CD4 T cell	-1.49718	IL17C	-1
CXCL10	0.0027941	Immature dendritic cell	1		Gamma delta T cell	-2.60645	IL17C	-1
CCL28	0.0007481	Immature dendritic cell	1		Immature B cell	2.96675	IL17C	1
CCL2	0.0023759	Immature dendritic cell	1		Immature dendritic cell	-3.30963	IL17C	-1
CCL11	0.0019423	Immature dendritic cell	1		Macrophage	-1.96952	IL17C	-1
CCL1	-0.002339	Immature dendritic cell	-1		Mast cell	-3.52361	IL17C	-1
CXCL9	0.0021055	Macrophage	1		MDSC	2.40805	IL17C	1
CXCL16	0.00117577	Macrophage	1		Monocyte	-0.84509	IL17C	-1
CXCL13	0.0026465	Macrophage	1		Natural killer T cell	-1.53563	IL17C	-1
CXCL10	0.00228192	Macrophage	1		Activated CD8 T cell	-1.40335	IL17D	-1
CXCL1	0.0015803	Macrophage	1		Macrophage	-1.2009	IL17D	-1
CCL4	0.00109128	Macrophage	1		Mast cell	-2.53941	IL17D	-1
CCL22	0.00200965	Macrophage	1		Central memory CD4 T cell	-1.16213	IL17F	-1
CCL21	0.00226674	Macrophage	1		Immature dendritic cell	-2.4136	IL17F	-1
CCL18	0.00322455	Macrophage	1		Natural killer T cell	-1.28332	IL17F	-1
CCL25	-0.0040749	Mast cell	-1		Mast cell	-7.12477	IL18	-1
CCL2	0.0022642	Mast cell	1		Natural killer cell	4.17553	IL18	1
CCL1	-0.0032152	Mast cell	-1		Type 17 T helper cell	5.65755	IL18	1
CXCL13	0.00694911	MDSC	1		Activated B cell	-10.6875	IL19	-1
CCL19	0.00673173	MDSC	1		Activated dendritic cell	4.64749	IL19	1
CCL17	0.00819049	MDSC	1		Natural killer cell	-7.8024	IL20	-1
CXCL13	0.00508872	Memory B cell	1		Activated B cell	3.56778	IL21	1
CXCL1	0.00186913	Memory B cell	1		Activated CD4 T cell	1.67644	IL21	1
CCL22	0.00298671	Memory B cell	1		Activated CD8 T cell	0.84534	IL21	1
CCL19	0.00380657	Memory B cell	1		CD56dim natural killer cell	-0.28009	IL21	-1
CCL18	0.00421135	Memory B cell	1		Effector memeory CD8 T cell	1.02502	IL21	1
CCL13	0.00318039	Memory B cell	1		Eosinophil	0.76303	IL21	1
CXCL9	0.001043	Monocyte	1		Immature B cell	3.49696	IL21	1
CXCL16	0.0006061	Monocyte	1		Macrophage	0.85828	IL21	1
CXCL13	0.0015193	Monocyte	1		MDSC	1.81934	IL21	1
CXCL1	0.00078818	Monocyte	1		Memory B cell	1.06631	IL21	1
CCL22	0.0010353	Monocyte	1		Monocyte	0.45555	IL21	1
CCL18	0.0017744	Monocyte	1		Natural killer T cell	0.5608	IL21	1
CXCL10	0.003757	Natural killer cell	1		Regulatory T cell	1.24461	IL21	1
CCL22	0.0040004	Natural killer cell	1		T follicular helper cell	0.393	IL21	1
CCL14	-0.0060392	Natural killer cell	-1		Type 1 T helper cell	0.61882	IL21	1
CXCL9	0.0015079	Natural killer T cell	1		CD56dim natural killer cell	29.6097	IL22	1
CXCL16	0.0020198	Natural killer T cell	1		Immature dendritic cell	-18.6554	IL22	-1
CXCL14	0.0011784	Natural killer T cell	1		Neutrophil	33.899	IL22	1
CXCL1	0.0018399	Natural killer T cell	1		Activated B cell	1.92248	IL24	1
CCL26	-0.002001	Natural killer T cell	-1		Activated CD4 T cell	0.698117	IL24	1
CCL25	-0.0018197	Natural killer T cell	-1		Effector memeory CD8 T cell	0.356384	IL24	1
CCL22	0.0032534	Natural killer T cell	1		Immature B cell	1.952	IL24	1
CCL18	0.0031907	Natural killer T cell	1		MDSC	1.04742	IL24	1
CXCL9	0.0024915	Neutrophil	1		Memory B cell	0.488864	IL24	1
CXCL6	0.0032708	Neutrophil	1		Type 1 T helper cell	0.281093	IL24	1
CXCL11	0.0047489	Neutrophil	1		Central memory CD4 T cell	-2.29941	IL25	-1
CXCL1	0.0033572	Neutrophil	1		Gamma delta T cell	-3.65415	IL25	-1
CCL18	0.0049932	Neutrophil	1		Immature dendritic cell	-5.72698	IL25	-1
CXCL9	0.00104	Plasmacytoid dendritic cell	1		Macrophage	-2.26041	IL25	-1
CXCL14	0.000636	Plasmacytoid dendritic cell	1		Natural killer T cell	-3.58857	IL25	-1
CXCL10	0.0011644	Plasmacytoid dendritic cell	1		Plasmacytoid dendritic cell	1.78036	IL26	1
CCL28	0.00039204	Plasmacytoid dendritic cell	1		Central memory CD4 T cell	-1.4468	IL31	-1
CCL26	-0.0010706	Plasmacytoid dendritic cell	-1		Immature dendritic cell	-3.11323	IL31	-1
CCL25	-0.0010728	Plasmacytoid dendritic cell	-1		Macrophage	-1.56404	IL31	-1
CCL23	-0.0010557	Plasmacytoid dendritic cell	-1		Mast cell	-4.33448	IL31	-1
CCL2	0.0013434	Plasmacytoid dendritic cell	1		Monocyte	-0.96091	IL31	-1
CCL1	-0.0016813	Plasmacytoid dendritic cell	-1		Natural killer T cell	-1.80149	IL31	-1
CXCL9	0.0022109	Regulatory T cell	1		Gamma delta T cell	0.884632	IL32	1
CXCL3	0.001433	Regulatory T cell	1		Macrophage	0.906276	IL32	1
CXCL13	0.0041315	Regulatory T cell	1		Regulatory T cell	10.193	IL34	1
CXCL1	0.0015217	Regulatory T cell	1
CCL4	0.0019571	Regulatory T cell	1
CCL3	0.0014706	Regulatory T cell	1
CCL22	0.0022531	Regulatory T cell	1
CCL21	0.0036618	Regulatory T cell	1
CCL20	0.002963	Regulatory T cell	1
CCL2	0.0014553	Regulatory T cell	1
CCL19	0.004187	Regulatory T cell	1
CCL18	0.0041467	Regulatory T cell	1
CCL13	0.0043566	Regulatory T cell	1
CXCL13	0.0049369	T follicular helper cell	1
CCL25	-0.0022723	T follicular helper cell	-1
CXCL13	0.0055635	Type 1 T helper cell	1
CCL26	-0.0018298	Type 1 T helper cell	-1
PPBP	-0.0011463	Type 2 T helper cell	-1
CXCL9	0.00095526	Type 2 T helper cell	1
CXCL2	0.00069964	Type 2 T helper cell	1
CXCL14	0.00056712	Type 2 T helper cell	1
CXCL12	0.00055231	Type 2 T helper cell	1
CCL28	0.00033176	Type 2 T helper cell	1
CCL26	-0.00085539	Type 2 T helper cell	-1
CCL21	0.0012821	Type 2 T helper cell	1
CCL2	0.0010451	Type 2 T helper cell	1
CCL11	0.0011161	Type 2 T helper cell	1
CCL1	-0.0011924	Type 2 T helper cell	-1
CX3CL1	0.0016846	Type 17 T helper cell	1
CCL16	-0.0024059	Type 17 T helper cell	-1

## Sheet: AG to EAG
Table S8-3-1 The results of correlation between chemokines and immune cells from AG to EAG by PLSR					Table S8-3-2 The results of correlation between immune cells and interleukins from AG to EAG by PLSR
Chemokine	Estimate	Immune Cell	Sign		Immune Cell	Estimate	Interleukin	Sign
CXCL16	0.0048547	Activated B cell	1		Effector memeory CD8 T cell	15.8362	IL1A	1
CXCL13	0.031925	Activated B cell	1		MDSC	10.9007	IL1A	1
CCL22	0.016894	Activated B cell	1		Central memory CD4 T cell	-0.934408	IL2	-1
CCL19	0.018357	Activated B cell	1		Immature dendritic cell	-2.13749	IL2	-1
CXCL9	0.00318724	Activated CD4 T cell	1		Regulatory T cell	-2.77475	IL2	-1
CXCL16	0.00165879	Activated CD4 T cell	1		Mast cell	-9.48065	IL3	-1
CXCL13	0.0064556	Activated CD4 T cell	1		Neutrophil	3.13638	IL3	1
CXCL11	0.0042677	Activated CD4 T cell	1		Central memory CD4 T cell	-2.06988	IL4	-1
CXCL10	0.00408997	Activated CD4 T cell	1		Immature dendritic cell	-2.37098	IL4	-1
CXCL1	0.00355475	Activated CD4 T cell	1		Type 2 T helper cell	19.9238	IL5	1
CCL5	0.00184372	Activated CD4 T cell	1		Effector memeory CD8 T cell	0.371175	IL6	1
CCL4	0.00196602	Activated CD4 T cell	1		Mast cell	-3.07411	IL7	-1
CCL24	0.00304464	Activated CD4 T cell	1		Type 17 T helper cell	3.80714	IL7	1
CCL22	0.00423712	Activated CD4 T cell	1		Macrophage	-1.04062	IL11	-1
CCL19	0.00512276	Activated CD4 T cell	1		Plasmacytoid dendritic cell	-1.11647	IL11	-1
CCL18	0.00597211	Activated CD4 T cell	1		Activated B cell	2.67548	IL12A	1
CCL17	0.00310593	Activated CD4 T cell	1		Gamma delta T cell	-1.32582	IL12A	-1
CXCL11	0.00731475	Activated CD8 T cell	1		Immature B cell	2.42647	IL12A	1
CXCL10	0.00439812	Activated CD8 T cell	1		Immature dendritic cell	-1.88356	IL12A	-1
CXCL9	0.0013504	Activated dendritic cell	1		Regulatory T cell	-2.20281	IL12A	-1
CXCL2	0.00073951	Activated dendritic cell	1		Type 2 T helper cell	-1.21026	IL12A	-1
CXCL16	0.0006745	Activated dendritic cell	1		Natural killer T cell	-0.604236	IL13	-1
CXCL13	0.0019942	Activated dendritic cell	1		Mast cell	-7.76746	IL15	-1
CXCL11	0.0016689	Activated dendritic cell	1		Activated B cell	2.04909	IL16	1
CXCL10	0.0016505	Activated dendritic cell	1		Effector memeory CD8 T cell	0.49066	IL16	1
CXCL1	0.0013833	Activated dendritic cell	1		Gamma delta T cell	-0.289372	IL16	-1
CCL8	0.0013296	Activated dendritic cell	1		Immature B cell	1.83369	IL16	1
CCL5	0.00054382	Activated dendritic cell	1		MDSC	0.737516	IL16	1
CCL4	0.0010494	Activated dendritic cell	1		Memory B cell	0.358611	IL16	1
CCL24	0.0017505	Activated dendritic cell	1		Type 1 T helper cell	0.187976	IL16	1
CCL22	0.0013402	Activated dendritic cell	1		Type 17 T helper cell	0.279915	IL16	1
CCL21	0.0013638	Activated dendritic cell	1		Type 2 T helper cell	-0.315258	IL16	-1
CCL20	0.0020731	Activated dendritic cell	1		Activated B cell	1.60761	IL17A	1
CCL2	0.00076583	Activated dendritic cell	1		Activated CD4 T cell	0.869004	IL17A	1
CCL19	0.0019142	Activated dendritic cell	1		Activated CD8 T cell	0.352459	IL17A	1
CCL18	0.0020038	Activated dendritic cell	1		Effector memeory CD8 T cell	0.508633	IL17A	1
CCL17	0.00088478	Activated dendritic cell	1		Immature B cell	1.55907	IL17A	1
PF4	-0.002912	CD56bright natural killer cell	-1		Macrophage	0.393519	IL17A	1
CCL26	-0.0026177	CD56bright natural killer cell	-1		MDSC	0.905276	IL17A	1
CCL3	0.0092367	CD56dim natural killer cell	1		Memory B cell	0.44896	IL17A	1
CXCL9	0.00098977	Central memory CD4 T cell	1		Type 1 T helper cell	0.265088	IL17A	1
CXCL6	0.00074292	Central memory CD4 T cell	1		Activated dendritic cell	-25.9394	IL17B	-1
CXCL5	0.00099997	Central memory CD4 T cell	1		Eosinophil	-14.3559	IL17F	-1
CXCL2	0.00050824	Central memory CD4 T cell	1		Mast cell	-11.6113	IL17F	-1
CXCL16	0.00038181	Central memory CD4 T cell	1		Immature dendritic cell	9.52948	IL18	1
CXCL14	0.00045221	Central memory CD4 T cell	1		Neutrophil	4.32799	IL18	1
CXCL13	0.001354	Central memory CD4 T cell	1		Eosinophil	-24.5361	IL19	-1
CXCL11	0.0011356	Central memory CD4 T cell	1		Neutrophil	5.10892	IL20	1
CXCL10	0.0012894	Central memory CD4 T cell	1		Activated B cell	2.94127	IL21	1
CXCL1	0.00093218	Central memory CD4 T cell	1		Activated CD4 T cell	1.54545	IL21	1
CCL8	0.00069583	Central memory CD4 T cell	1		Activated CD8 T cell	0.791847	IL21	1
CCL4	0.00077476	Central memory CD4 T cell	1		Activated dendritic cell	0.501897	IL21	1
CCL3	0.00056176	Central memory CD4 T cell	1		CD56dim natural killer cell	-0.175316	IL21	-1
CCL24	0.0007166	Central memory CD4 T cell	1		Central memory CD4 T cell	0.407445	IL21	1
CCL22	0.00099557	Central memory CD4 T cell	1		Central memory CD8 T cell	0.484669	IL21	1
CCL21	0.0011034	Central memory CD4 T cell	1		Effector memeory CD4 T cell	0.308021	IL21	1
CCL20	0.0012135	Central memory CD4 T cell	1		Effector memeory CD8 T cell	1.00744	IL21	1
CCL2	0.00078571	Central memory CD4 T cell	1		Eosinophil	0.674322	IL21	1
CCL19	0.0013923	Central memory CD4 T cell	1		Gamma delta T cell	0.364116	IL21	1
CCL18	0.0017378	Central memory CD4 T cell	1		Immature B cell	2.99041	IL21	1
PF4	-0.00360784	Central memory CD8 T cell	-1		Immature dendritic cell	0.455748	IL21	1
CXCL11	0.00417954	Central memory CD8 T cell	1		Macrophage	0.857681	IL21	1
CXCL10	0.00469748	Central memory CD8 T cell	1		MDSC	1.56742	IL21	1
CCL21	0.00439198	Central memory CD8 T cell	1		Memory B cell	0.899872	IL21	1
CCL2	0.00286651	Central memory CD8 T cell	1		Monocyte	0.369716	IL21	1
CCL11	0.00494022	Central memory CD8 T cell	1		Natural killer cell	0.440355	IL21	1
CCL1	-0.00446643	Central memory CD8 T cell	-1		Natural killer T cell	0.494795	IL21	1
CCL25	0.00740231	Effector memeory CD4 T cell	1		Plasmacytoid dendritic cell	0.227806	IL21	1
CCL18	0.00579316	Effector memeory CD4 T cell	1		Regulatory T cell	1.32366	IL21	1
CCL16	-0.00672442	Effector memeory CD4 T cell	-1		T follicular helper cell	0.407786	IL21	1
CCL11	0.00539037	Effector memeory CD4 T cell	1		Type 1 T helper cell	0.553123	IL21	1
CXCL9	0.0023422	Effector memeory CD8 T cell	1		Type 17 T helper cell	0.264454	IL21	1
CXCL6	0.0012503	Effector memeory CD8 T cell	1		Type 2 T helper cell	0.266931	IL21	1
CXCL16	0.0010376	Effector memeory CD8 T cell	1		MDSC	5.88579	IL25	1
CXCL13	0.0039351	Effector memeory CD8 T cell	1		Regulatory T cell	-8.05905	IL25	-1
CXCL11	0.0029282	Effector memeory CD8 T cell	1		CD56bright natural killer cell	0.627422	IL26	1
CXCL10	0.0028192	Effector memeory CD8 T cell	1		Central memory CD4 T cell	1.07353	IL26	1
CXCL1	0.001968	Effector memeory CD8 T cell	1		Central memory CD8 T cell	2.76869	IL26	1
CCL5	0.00099859	Effector memeory CD8 T cell	1		Gamma delta T cell	2.08705	IL26	1
CCL4	0.001517	Effector memeory CD8 T cell	1		Macrophage	1.48844	IL26	1
CCL3	0.001217	Effector memeory CD8 T cell	1		Natural killer T cell	1.21264	IL26	1
CCL22	0.0026012	Effector memeory CD8 T cell	1		Plasmacytoid dendritic cell	1.37695	IL26	1
CCL19	0.0031922	Effector memeory CD8 T cell	1		Type 2 T helper cell	1.63366	IL26	1
CCL18	0.0044311	Effector memeory CD8 T cell	1		Central memory CD8 T cell	-2.65192	IL31	-1
CCL17	0.0019727	Effector memeory CD8 T cell	1		Immature dendritic cell	-2.78915	IL31	-1
CXCL9	0.0015448	Eosinophil	1		Regulatory T cell	-4.63202	IL31	-1
CXCL16	0.00069363	Eosinophil	1		Activated CD4 T cell	1.64833	IL32	1
CXCL13	0.0028331	Eosinophil	1		Activated dendritic cell	0.855857	IL32	1
CXCL11	0.0016496	Eosinophil	1		Central memory CD8 T cell	1.03008	IL32	1
CXCL10	0.0018426	Eosinophil	1		Gamma delta T cell	0.949678	IL32	1
CXCL1	0.0012109	Eosinophil	1		Immature dendritic cell	0.676951	IL32	1
CCL8	0.0014606	Eosinophil	1		Macrophage	0.81531	IL32	1
CCL5	0.00088005	Eosinophil	1		Memory B cell	0.633141	IL32	1
CCL4	0.0011789	Eosinophil	1		Natural killer cell	0.547958	IL32	1
CCL22	0.0016736	Eosinophil	1		Natural killer T cell	0.51221	IL32	1
CCL21	0.0013391	Eosinophil	1		Regulatory T cell	1.22816	IL32	1
CCL19	0.0023121	Eosinophil	1		Type 1 T helper cell	0.318126	IL32	1
CCL18	0.0024718	Eosinophil	1		Activated B cell	-3.53498	IL33	-1
CCL17	0.0008743	Eosinophil	1		Central memory CD4 T cell	1.41726	IL33	1
CXCL9	0.0013452	Gamma delta T cell	1		Immature B cell	-2.88692	IL33	-1
CXCL6	0.0011024	Gamma delta T cell	1		Neutrophil	-2.57459	IL33	-1
CXCL5	0.0015963	Gamma delta T cell	1		Central memory CD4 T cell	0.177229	IL34	1
CXCL2	0.00078393	Gamma delta T cell	1		Macrophage	0.164526	IL34	1
CXCL16	0.00057312	Gamma delta T cell	1		Natural killer cell	0.141226	IL34	1
CXCL14	0.00055242	Gamma delta T cell	1		Regulatory T cell	0.47395	IL34	1
CXCL13	0.0013427	Gamma delta T cell	1		Activated CD8 T cell	-3.77195	IL14	-1
CXCL11	0.0015297	Gamma delta T cell	1
CXCL10	0.0018436	Gamma delta T cell	1
CXCL1	0.0012851	Gamma delta T cell	1
CCL4	0.0012263	Gamma delta T cell	1
CCL24	0.0015712	Gamma delta T cell	1
CCL22	0.0010693	Gamma delta T cell	1
CCL20	0.0023594	Gamma delta T cell	1
CCL19	0.0016952	Gamma delta T cell	1
CCL18	0.002081	Gamma delta T cell	1
CXCL9	0.005391	Immature B cell	1
CXCL16	0.00279442	Immature B cell	1
CXCL13	0.0132412	Immature B cell	1
CXCL11	0.00688955	Immature B cell	1
CXCL10	0.00691278	Immature B cell	1
CXCL1	0.00545597	Immature B cell	1
CCL22	0.00840385	Immature B cell	1
CCL19	0.0100226	Immature B cell	1
CCL18	0.0119729	Immature B cell	1
CXCL9	0.0012766	Immature dendritic cell	1
CXCL6	0.0010469	Immature dendritic cell	1
CXCL5	0.0014777	Immature dendritic cell	1
CXCL2	0.00083097	Immature dendritic cell	1
CXCL16	0.00052009	Immature dendritic cell	1
CXCL14	0.00067982	Immature dendritic cell	1
CXCL13	0.0014932	Immature dendritic cell	1
CXCL11	0.0014899	Immature dendritic cell	1
CXCL10	0.0017992	Immature dendritic cell	1
CXCL1	0.0012291	Immature dendritic cell	1
CCL8	0.0011425	Immature dendritic cell	1
CCL4	0.0012998	Immature dendritic cell	1
CCL3	0.00060668	Immature dendritic cell	1
CCL24	0.0011808	Immature dendritic cell	1
CCL22	0.0011344	Immature dendritic cell	1
CCL20	0.0021832	Immature dendritic cell	1
CCL19	0.0017255	Immature dendritic cell	1
CCL18	0.0020569	Immature dendritic cell	1
CXCL9	0.00202526	Macrophage	1
CXCL6	0.00122853	Macrophage	1
CXCL2	0.00090065	Macrophage	1
CXCL16	0.00088998	Macrophage	1
CXCL14	0.00079176	Macrophage	1
CXCL13	0.00300184	Macrophage	1
CXCL11	0.00224453	Macrophage	1
CXCL10	0.00243395	Macrophage	1
CXCL1	0.001767	Macrophage	1
CCL8	0.00150335	Macrophage	1
CCL5	0.00086783	Macrophage	1
CCL4	0.00152662	Macrophage	1
CCL3	0.00101073	Macrophage	1
CCL24	0.00167747	Macrophage	1
CCL22	0.00206735	Macrophage	1
CCL21	0.00195435	Macrophage	1
CCL20	0.0023194	Macrophage	1
CCL2	0.00120206	Macrophage	1
CCL19	0.00276706	Macrophage	1
CCL18	0.00333955	Macrophage	1
CCL17	0.00112717	Macrophage	1
CCL15	-0.0123839	Mast cell	-1
CCL1	-0.00751175	Mast cell	-1
CXCL9	0.0031276	MDSC	1
CXCL16	0.001542	MDSC	1
CXCL13	0.0065609	MDSC	1
CXCL11	0.0043042	MDSC	1
CXCL10	0.0037444	MDSC	1
CXCL1	0.0032937	MDSC	1
CX3CL1	0.0010418	MDSC	1
CCL5	0.0013928	MDSC	1
CCL3	0.0020843	MDSC	1
CCL22	0.0043833	MDSC	1
CCL19	0.0052612	MDSC	1
CCL18	0.006097	MDSC	1
CCL17	0.0038808	MDSC	1
CXCL9	0.0018409	Memory B cell	1
CXCL16	0.00090222	Memory B cell	1
CXCL14	0.00075296	Memory B cell	1
CXCL13	0.0037818	Memory B cell	1
CXCL11	0.0023155	Memory B cell	1
CXCL10	0.0024143	Memory B cell	1
CXCL1	0.0018639	Memory B cell	1
CCL22	0.0025147	Memory B cell	1
CCL19	0.0030552	Memory B cell	1
CCL18	0.0038231	Memory B cell	1
CCL17	0.0017178	Memory B cell	1
CXCL9	0.0010617	Natural killer cell	1
CXCL6	0.00066651	Natural killer cell	1
CXCL2	0.00062305	Natural killer cell	1
CXCL16	0.00048053	Natural killer cell	1
CXCL14	0.00045107	Natural killer cell	1
CXCL13	0.0016656	Natural killer cell	1
CXCL11	0.0014203	Natural killer cell	1
CXCL10	0.0014357	Natural killer cell	1
CXCL1	0.0010465	Natural killer cell	1
CCL8	0.00086638	Natural killer cell	1
CCL4	0.00077026	Natural killer cell	1
CCL3	0.00053658	Natural killer cell	1
CCL22	0.0010946	Natural killer cell	1
CCL21	0.00084073	Natural killer cell	1
CCL20	0.0011891	Natural killer cell	1
CCL2	0.00065478	Natural killer cell	1
CCL19	0.0014619	Natural killer cell	1
CCL18	0.001929	Natural killer cell	1
CCL17	0.00061277	Natural killer cell	1
CXCL16	0.00151	Natural killer T cell	1
CXCL13	0.00303	Natural killer T cell	1
CXCL10	0.00144	Natural killer T cell	1
CCL19	0.00271	Natural killer T cell	1
CCL14	-0.00291	Natural killer T cell	-1
CCL1	-0.00135	Natural killer T cell	-1
XCL1	-0.0041529	Neutrophil	-1
CXCL5	0.0069118	Neutrophil	1
CXCL1	0.0043703	Neutrophil	1
CCL25	0.01216	Neutrophil	1
CCL24	0.0074544	Neutrophil	1
CCL20	0.0070752	Neutrophil	1
CXCL9	0.00287908	Regulatory T cell	1
CXCL6	0.00210841	Regulatory T cell	1
CXCL2	0.00157883	Regulatory T cell	1
CXCL16	0.00129926	Regulatory T cell	1
CXCL14	0.00139091	Regulatory T cell	1
CXCL13	0.00473216	Regulatory T cell	1
CXCL11	0.00343414	Regulatory T cell	1
CXCL10	0.00403556	Regulatory T cell	1
CXCL1	0.00295759	Regulatory T cell	1
CCL8	0.00244713	Regulatory T cell	1
CCL4	0.00237772	Regulatory T cell	1
CCL3	0.00139854	Regulatory T cell	1
CCL24	0.00219228	Regulatory T cell	1
CCL22	0.00320546	Regulatory T cell	1
CCL21	0.00341808	Regulatory T cell	1
CCL20	0.00382474	Regulatory T cell	1
CCL2	0.00236416	Regulatory T cell	1
CCL19	0.00455849	Regulatory T cell	1
CCL18	0.00554271	Regulatory T cell	1
XCL2	-0.0043244	T follicular helper cell	-1
CXCL3	-0.0031083	T follicular helper cell	-1
CXCL13	0.0047484	T follicular helper cell	1
CXCL12	0.0019271	T follicular helper cell	1
CCL2	0.0035986	T follicular helper cell	1
CXCL16	0.00098328	Type 1 T helper cell	1
CXCL13	0.0043672	Type 1 T helper cell	1
CXCL11	0.0020893	Type 1 T helper cell	1
CXCL10	0.0015743	Type 1 T helper cell	1
CCL22	0.0022442	Type 1 T helper cell	1
CCL19	0.0028474	Type 1 T helper cell	1
CXCL5	0.0020299	Type 2 T helper cell	1
CXCL1	0.001183	Type 2 T helper cell	1
CCL28	0.0010804	Type 2 T helper cell	1
CCL25	0.0025915	Type 2 T helper cell	1
CCL24	0.0025321	Type 2 T helper cell	1
CCL20	0.0026793	Type 2 T helper cell	1
CXCL9	0.00051039	Type 17 T helper cell	1
CXCL13	0.0014832	Type 17 T helper cell	1
CXCL11	0.00058169	Type 17 T helper cell	1
CXCL10	0.0006435	Type 17 T helper cell	1
CCL22	0.00091543	Type 17 T helper cell	1
CCL19	0.00094041	Type 17 T helper cell	1
CCL18	0.0012709	Type 17 T helper cell	1

## Sheet: EAG to T12
Table S8-4-1 The results of correlation between chemokines and immune cells from EAG to T1/2 by PLSR							Table S8-4-2 The results of correlation between immune cells and interleukins from EAG to T1/2 by PLSR
Chemokine	Estimate	Immune Cell	Sign				Immune Cell	Estimate	Interleukin	Sign
CXCL9	0.0028099	Activated B cell	1	*			CD56dim natural killer cell	-1.92361	IL1A	-1
CXCL6	0.0018967	Activated B cell	1	*			Central memory CD8 T cell	-1.19154	IL1A	-1
CXCL14	0.0038839	Activated B cell	1	*			Immature B cell	2.81377	IL1A	1
CXCL13	0.0039808	Activated B cell	1				Immature dendritic cell	-1.4335	IL1A	-1
CXCL10	0.0039216	Activated B cell	1	*			Macrophage	2.0039	IL1A	1
CCL22	0.0037665	Activated B cell	1	*			Mast cell	1.04387	IL1A	1
CCL21	0.0046835	Activated B cell	1	*			Monocyte	-2.1175	IL1A	-1
CCL20	0.0052759	Activated B cell	1	*			Natural killer cell	-1.62844	IL1A	-1
CCL2	0.0035308	Activated B cell	1	*			Plasmacytoid dendritic cell	-1.79991	IL1A	-1
CCL19	0.0043899	Activated B cell	1				Activated B cell	-5.98621	IL2	-1
CCL18	0.0048347	Activated B cell	1	*			Activated CD4 T cell	-3.77979	IL2	-1
XCL2	-0.0017436	Activated CD4 T cell	-1	*			Central memory CD4 T cell	-3.59637	IL2	-1
XCL1	-0.0020848	Activated CD4 T cell	-1	*			Central memory CD8 T cell	-4.57847	IL2	-1
PPBP	-0.00057648	Activated CD4 T cell	-1	*			Immature B cell	4.09341	IL2	1
PF4	-0.0015596	Activated CD4 T cell	-1	*			Neutrophil	3.16903	IL2	1
CXCL9	0.00034164	Activated CD4 T cell	1	*			Type 1 T helper cell	-3.35756	IL2	-1
CXCL6	0.0011448	Activated CD4 T cell	1	*			Type 17 T helper cell	3.93629	IL2	1
CXCL5	0.0020468	Activated CD4 T cell	1	*			Activated CD4 T cell	-4.50864	IL3	-1
CXCL3	0.00067588	Activated CD4 T cell	1	*			Central memory CD4 T cell	-3.97218	IL3	-1
CXCL2	-0.00016675	Activated CD4 T cell	-1	*			Central memory CD8 T cell	-5.78851	IL3	-1
CXCL16	0.00033371	Activated CD4 T cell	1	*			Immature B cell	4.26589	IL3	1
CXCL14	0.0023652	Activated CD4 T cell	1	*			Macrophage	4.40898	IL3	1
CXCL12	0.0023644	Activated CD4 T cell	1	*			Monocyte	-5.44953	IL3	-1
CXCL10	0.0008768	Activated CD4 T cell	1	*			Type 1 T helper cell	-3.37753	IL3	-1
CXCL1	0.001894	Activated CD4 T cell	1	*			Type 17 T helper cell	4.02778	IL3	1
CX3CL1	-0.00062414	Activated CD4 T cell	-1	*			Central memory CD4 T cell	-2.89137	IL4	-1
CCL8	-0.00082451	Activated CD4 T cell	-1	*			Central memory CD8 T cell	-3.28593	IL4	-1
CCL5	-0.00012159	Activated CD4 T cell	-1	*			Gamma delta T cell	-2.60358	IL4	-1
CCL4	-0.00072379	Activated CD4 T cell	-1	*			Immature B cell	3.83336	IL4	1
CCL3	-0.00045294	Activated CD4 T cell	-1	*			Immature dendritic cell	-3.50488	IL4	-1
CCL28	0.0024775	Activated CD4 T cell	1	*			Macrophage	4.25014	IL4	1
CCL26	0.00027894	Activated CD4 T cell	1	*			Monocyte	-4.80517	IL4	-1
CCL25	-0.0013249	Activated CD4 T cell	-1	*			Natural killer cell	-2.44141	IL4	-1
CCL24	0.0015262	Activated CD4 T cell	1	*			Regulatory T cell	-4.32688	IL4	-1
CCL23	-0.00041167	Activated CD4 T cell	-1	*			Type 1 T helper cell	-2.87424	IL4	-1
CCL22	0.00089655	Activated CD4 T cell	1	*			Type 17 T helper cell	2.78677	IL4	1
CCL21	0.0012649	Activated CD4 T cell	1	*			Activated B cell	-1.63538	IL5	-1
CCL20	0.00096092	Activated CD4 T cell	1	*			Activated CD4 T cell	-1.37676	IL5	-1
CCL2	0.0009493	Activated CD4 T cell	1	*			Activated CD8 T cell	-0.497671	IL5	-1
CCL19	0.00037154	Activated CD4 T cell	1				Activated dendritic cell	0.226718	IL5	1
CCL18	0.00089586	Activated CD4 T cell	1	*			CD56bright natural killer cell	-0.963713	IL5	-1
CCL17	0.00098452	Activated CD4 T cell	1	*			CD56dim natural killer cell	-1.49002	IL5	-1
CCL16	0.00097927	Activated CD4 T cell	1	*			Central memory CD4 T cell	-1.974	IL5	-1
CCL15	0.00054797	Activated CD4 T cell	1	*			Central memory CD8 T cell	-1.46374	IL5	-1
CCL14	-0.00087419	Activated CD4 T cell	-1	*			Effector memeory CD8 T cell	-1.37859	IL5	-1
CCL13	-0.00084416	Activated CD4 T cell	-1	*			Eosinophil	0.465828	IL5	1
CCL11	0.0010307	Activated CD4 T cell	1	*			Gamma delta T cell	-1.14989	IL5	-1
CCL1	-0.0019059	Activated CD4 T cell	-1	*			Immature dendritic cell	-1.55407	IL5	-1
XCL2	-0.00065505	Activated CD8 T cell	-1	*			Macrophage	0.913815	IL5	1
XCL1	-0.00069909	Activated CD8 T cell	-1	*			Mast cell	0.913895	IL5	1
PPBP	-0.0003988	Activated CD8 T cell	-1	*			MDSC	-0.659268	IL5	-1
PF4	-0.00050389	Activated CD8 T cell	-1	*			Memory B cell	-0.648106	IL5	-1
CXCL9	0.00014189	Activated CD8 T cell	1	*			Monocyte	-1.68087	IL5	-1
CXCL6	0.00040482	Activated CD8 T cell	1	*			Natural killer cell	-1.86821	IL5	-1
CXCL5	0.00073002	Activated CD8 T cell	1	*			Natural killer T cell	0.551106	IL5	1
CXCL3	0.00022886	Activated CD8 T cell	1	*			Neutrophil	0.884991	IL5	1
CXCL2	-7.2204e-05	Activated CD8 T cell	-1	*			Plasmacytoid dendritic cell	-1.54834	IL5	-1
CXCL16	0.00012408	Activated CD8 T cell	1	*			Regulatory T cell	-0.762301	IL5	-1
CXCL14	0.00087323	Activated CD8 T cell	1	*			Type 1 T helper cell	-1.06938	IL5	-1
CXCL12	0.00084413	Activated CD8 T cell	1	*			Type 17 T helper cell	-0.152565	IL5	-1
CXCL10	0.00035592	Activated CD8 T cell	1	*			Type 2 T helper cell	-0.571231	IL5	-1
CXCL1	0.00069221	Activated CD8 T cell	1	*			Activated B cell	-0.81772	IL6	-1
CX3CL1	-0.00019579	Activated CD8 T cell	-1	*			Activated CD4 T cell	-0.686778	IL6	-1
CCL8	-0.00032905	Activated CD8 T cell	-1	*			Activated CD8 T cell	-0.301656	IL6	-1
CCL4	-0.0002264	Activated CD8 T cell	-1	*			Activated dendritic cell	0.15873	IL6	1
CCL3	-0.00018806	Activated CD8 T cell	-1	*			CD56bright natural killer cell	-0.529118	IL6	-1
CCL28	0.00089704	Activated CD8 T cell	1	*			CD56dim natural killer cell	-0.880652	IL6	-1
CCL26	0.000116	Activated CD8 T cell	1	*			Central memory CD4 T cell	-1.10807	IL6	-1
CCL25	-0.00049789	Activated CD8 T cell	-1	*			Central memory CD8 T cell	-0.931977	IL6	-1
CCL24	0.00052055	Activated CD8 T cell	1	*			Effector memeory CD8 T cell	-0.778029	IL6	-1
CCL23	-0.00013979	Activated CD8 T cell	-1	*			Eosinophil	0.273589	IL6	1
CCL22	0.00029542	Activated CD8 T cell	1	*			Gamma delta T cell	-0.563909	IL6	-1
CCL21	0.0003944	Activated CD8 T cell	1	*			Immature dendritic cell	-0.844693	IL6	-1
CCL20	0.00019794	Activated CD8 T cell	1	*			Macrophage	0.468787	IL6	1
CCL2	0.00035772	Activated CD8 T cell	1	*			Mast cell	0.509363	IL6	1
CCL18	0.00039601	Activated CD8 T cell	1	*			MDSC	-0.38138	IL6	-1
CCL17	0.0004174	Activated CD8 T cell	1	*			Memory B cell	-0.342538	IL6	-1
CCL16	0.00033225	Activated CD8 T cell	1	*			Monocyte	-0.96752	IL6	-1
CCL14	-0.0002668	Activated CD8 T cell	-1	*			Natural killer cell	-0.974944	IL6	-1
CCL13	-0.00025413	Activated CD8 T cell	-1	*			Natural killer T cell	0.317598	IL6	1
CCL11	0.00036767	Activated CD8 T cell	1	*			Neutrophil	0.482656	IL6	1
CCL1	-0.00064224	Activated CD8 T cell	-1	*			Plasmacytoid dendritic cell	-0.885505	IL6	-1
XCL2	0.0019562	Activated dendritic cell	1	*			Regulatory T cell	-0.365138	IL6	-1
PF4	0.0013775	Activated dendritic cell	1	*			Type 1 T helper cell	-0.617771	IL6	-1
CXCL2	0.0011808	Activated dendritic cell	1	*			Type 17 T helper cell	-0.123167	IL6	-1
CXCL14	-0.00098491	Activated dendritic cell	-1	*			Type 2 T helper cell	-0.337182	IL6	-1
CXCL13	0.0021068	Activated dendritic cell	1				Gamma delta T cell	-1.17354	IL7	-1
CCL3	0.0018042	Activated dendritic cell	1	*			Immature B cell	2.52827	IL7	1
CCL21	0.0017232	Activated dendritic cell	1	*			Macrophage	2.88701	IL7	1
CCL20	0.0025935	Activated dendritic cell	1	*			Monocyte	-1.07856	IL7	-1
CCL18	0.0018875	Activated dendritic cell	1	*			Natural killer T cell	1.24048	IL7	1
XCL2	-0.0012635	CD56bright natural killer cell	-1	*			Neutrophil	1.60145	IL7	1
XCL1	-0.0014721	CD56bright natural killer cell	-1	*			Type 1 T helper cell	-1.04574	IL7	-1
PPBP	-0.00058805	CD56bright natural killer cell	-1	*			Activated B cell	1.16409	IL10	1
PF4	-0.0010694	CD56bright natural killer cell	-1	*			Activated CD4 T cell	1.03813	IL10	1
CXCL9	0.00021601	CD56bright natural killer cell	1	*			Activated CD8 T cell	0.328694	IL10	1
CXCL6	0.00080162	CD56bright natural killer cell	1	*			Activated dendritic cell	-0.12503	IL10	-1
CXCL5	0.0013816	CD56bright natural killer cell	1	*			CD56bright natural killer cell	0.641923	IL10	1
CXCL3	0.00046076	CD56bright natural killer cell	1	*			CD56dim natural killer cell	1.01131	IL10	1
CXCL2	-0.00019547	CD56bright natural killer cell	-1	*			Central memory CD4 T cell	1.24638	IL10	1
CXCL16	0.0002093	CD56bright natural killer cell	1	*			Central memory CD8 T cell	0.966727	IL10	1
CXCL14	0.0016632	CD56bright natural killer cell	1	*			Effector memeory CD8 T cell	0.970974	IL10	1
CXCL12	0.0016142	CD56bright natural killer cell	1	*			Eosinophil	-0.292092	IL10	-1
CXCL10	0.00055887	CD56bright natural killer cell	1	*			Gamma delta T cell	0.792949	IL10	1
CXCL1	0.0012754	CD56bright natural killer cell	1	*			Immature dendritic cell	0.974521	IL10	1
CX3CL1	-0.0004077	CD56bright natural killer cell	-1	*			Macrophage	-0.566605	IL10	-1
CCL8	-0.00059855	CD56bright natural killer cell	-1	*			Mast cell	-0.711052	IL10	-1
CCL4	-0.0005394	CD56bright natural killer cell	-1	*			MDSC	0.512269	IL10	1
CCL3	-0.00035118	CD56bright natural killer cell	-1	*			Memory B cell	0.348092	IL10	1
CCL28	0.001719	CD56bright natural killer cell	1	*			Monocyte	1.04138	IL10	1
CCL26	0.00014957	CD56bright natural killer cell	1	*			Natural killer cell	1.19928	IL10	1
CCL25	-0.00095991	CD56bright natural killer cell	-1	*			Natural killer T cell	-0.298701	IL10	-1
CCL24	0.0010057	CD56bright natural killer cell	1	*			Neutrophil	-0.508923	IL10	-1
CCL23	-0.00032747	CD56bright natural killer cell	-1	*			Plasmacytoid dendritic cell	0.985527	IL10	1
CCL22	0.00055542	CD56bright natural killer cell	1	*			Regulatory T cell	0.529874	IL10	1
CCL21	0.00076784	CD56bright natural killer cell	1	*			Type 1 T helper cell	0.712032	IL10	1
CCL20	0.00056644	CD56bright natural killer cell	1	*			Type 17 T helper cell	0.097468	IL10	1
CCL2	0.00062173	CD56bright natural killer cell	1	*			Type 2 T helper cell	0.38204	IL10	1
CCL19	0.00022365	CD56bright natural killer cell	1				Activated B cell	15.4307	IL11	1
CCL18	0.00057995	CD56bright natural killer cell	1	*			Activated CD8 T cell	-10.9805	IL11	-1
CCL17	0.00072845	CD56bright natural killer cell	1	*			Effector memeory CD8 T cell	-8.41191	IL11	-1
CCL16	0.00072231	CD56bright natural killer cell	1	*			Immature dendritic cell	-8.83559	IL11	-1
CCL15	0.00031063	CD56bright natural killer cell	1	*			Natural killer T cell	16.1456	IL11	1
CCL14	-0.00056364	CD56bright natural killer cell	-1	*			Monocyte	-2.58276	IL12A	-1
CCL13	-0.00058834	CD56bright natural killer cell	-1	*			Plasmacytoid dendritic cell	6.16016	IL12A	1
CCL11	0.00069266	CD56bright natural killer cell	1	*			Type 17 T helper cell	6.07283	IL12A	1
CCL1	-0.0012905	CD56bright natural killer cell	-1	*			Type 2 T helper cell	-2.6252	IL12A	-1
XCL2	-0.0061363	CD56dim natural killer cell	-1	*			Activated dendritic cell	3.02907	IL12B	1	*
XCL1	-0.0029301	CD56dim natural killer cell	-1	*			Central memory CD8 T cell	-2.89259	IL12B	-1	*
PPBP	-0.0034288	CD56dim natural killer cell	-1	*			Memory B cell	6.19905	IL12B	1	*
PF4	-0.0029003	CD56dim natural killer cell	-1	*			Monocyte	-1.75081	IL12B	-1	*
CXCL2	-0.0015378	CD56dim natural killer cell	-1	*			Natural killer T cell	-2.70193	IL12B	-1	*
CXCL13	-0.0023227	CD56dim natural killer cell	-1				Type 17 T helper cell	2.46178	IL12B	1	*
CXCL12	0.0024869	CD56dim natural killer cell	1	*			Memory B cell	10.96	IL13	1
CXCL10	0.0025715	CD56dim natural killer cell	1	*			Natural killer T cell	-9.55934	IL13	-1
CXCL1	0.0021964	CD56dim natural killer cell	1	*			Activated B cell	1.78516	IL15	1
CCL3	-0.0023784	CD56dim natural killer cell	-1	*			Activated B cell	2.72015	IL16	1
CCL25	-0.0018226	CD56dim natural killer cell	-1	*			Activated CD4 T cell	1.48503	IL16	1
CCL24	0.0026237	CD56dim natural killer cell	1	*			Central memory CD8 T cell	1.85728	IL16	1
CCL22	0.0028235	CD56dim natural killer cell	1	*			Eosinophil	2.81588	IL16	1
CCL21	-0.0028893	CD56dim natural killer cell	-1	*			Plasmacytoid dendritic cell	-2.33208	IL16	-1
CCL15	-0.0027878	CD56dim natural killer cell	-1	*			Activated dendritic cell	8.88642	IL17A	1
CCL1	-0.0022218	CD56dim natural killer cell	-1	*			Plasmacytoid dendritic cell	14.5219	IL17A	1
XCL2	-0.0023896	Central memory CD4 T cell	-1	*			Type 17 T helper cell	13.1761	IL17A	1
XCL1	-0.0029499	Central memory CD4 T cell	-1	*			CD56dim natural killer cell	6.20236	IL17B	1
PPBP	-0.00088408	Central memory CD4 T cell	-1	*			Type 1 T helper cell	-23.1061	IL17B	-1
PF4	-0.0020835	Central memory CD4 T cell	-1	*			Activated CD4 T cell	-4.23679	IL17C	-1
CXCL9	0.00034727	Central memory CD4 T cell	1	*			Central memory CD4 T cell	-4.38034	IL17C	-1
CXCL6	0.0015803	Central memory CD4 T cell	1	*			Eosinophil	-3.05487	IL17C	-1
CXCL5	0.0028026	Central memory CD4 T cell	1	*			Macrophage	4.5104	IL17C	1
CXCL3	0.00089612	Central memory CD4 T cell	1	*			Monocyte	-4.57287	IL17C	-1
CXCL2	-0.00031135	Central memory CD4 T cell	-1	*			Type 1 T helper cell	-1.55491	IL17C	-1
CXCL16	0.00041485	Central memory CD4 T cell	1	*			Type 17 T helper cell	2.94196	IL17C	1
CXCL14	0.0033411	Central memory CD4 T cell	1	*			Activated dendritic cell	-12.2592	IL17D	-1
CXCL12	0.0033467	Central memory CD4 T cell	1	*			Central memory CD8 T cell	-9.77909	IL17D	-1
CXCL10	0.00097696	Central memory CD4 T cell	1	*			Eosinophil	-7.97116	IL17D	-1
CXCL1	0.002482	Central memory CD4 T cell	1	*			Gamma delta T cell	-7.46632	IL17D	-1
CX3CL1	-0.00085473	Central memory CD4 T cell	-1	*			Immature B cell	7.69427	IL17D	1
CCL8	-0.0012882	Central memory CD4 T cell	-1	*			Immature dendritic cell	-13.2271	IL17D	-1
CCL5	-0.00027385	Central memory CD4 T cell	-1	*			Natural killer cell	15.0038	IL17D	1
CCL4	-0.0011278	Central memory CD4 T cell	-1	*			Regulatory T cell	-6.81222	IL17D	-1
CCL3	-0.00063694	Central memory CD4 T cell	-1	*			Activated CD4 T cell	-11.5325	IL17F	-1
CCL28	0.0035898	Central memory CD4 T cell	1	*			CD56bright natural killer cell	-8.83605	IL17F	-1
CCL26	0.00043842	Central memory CD4 T cell	1	*			Plasmacytoid dendritic cell	12.2399	IL17F	1
CCL25	-0.0019401	Central memory CD4 T cell	-1	*			Type 17 T helper cell	8.65444	IL17F	1
CCL24	0.0020452	Central memory CD4 T cell	1	*			Type 2 T helper cell	7.92527	IL17F	1
CCL23	-0.00056448	Central memory CD4 T cell	-1	*			CD56dim natural killer cell	1.62348	IL18	1
CCL22	0.0011332	Central memory CD4 T cell	1	*			Effector memeory CD4 T cell	1.69181	IL18	1
CCL21	0.0018086	Central memory CD4 T cell	1	*			Eosinophil	-2.27027	IL18	-1
CCL20	0.00099221	Central memory CD4 T cell	1	*			Macrophage	2.64617	IL18	1
CCL2	0.0013361	Central memory CD4 T cell	1	*			Monocyte	-1.36544	IL18	-1
CCL19	0.00046234	Central memory CD4 T cell	1				Natural killer T cell	1.2588	IL18	1
CCL18	0.0012425	Central memory CD4 T cell	1	*			Neutrophil	1.87089	IL18	1
CCL17	0.0014327	Central memory CD4 T cell	1	*			Regulatory T cell	2.43836	IL18	1
CCL16	0.0014224	Central memory CD4 T cell	1	*			Activated B cell	-1.20113	IL19	-1
CCL15	0.00089614	Central memory CD4 T cell	1	*			Activated CD4 T cell	-0.971376	IL19	-1
CCL14	-0.0012387	Central memory CD4 T cell	-1	*			Activated CD8 T cell	-0.36106	IL19	-1
CCL13	-0.0012429	Central memory CD4 T cell	-1	*			Activated dendritic cell	0.19689	IL19	1
CCL11	0.0013653	Central memory CD4 T cell	1	*			CD56bright natural killer cell	-0.718684	IL19	-1
CCL1	-0.0026422	Central memory CD4 T cell	-1	*			CD56dim natural killer cell	-1.09875	IL19	-1
XCL2	-0.0020966	Central memory CD8 T cell	-1	*			Central memory CD4 T cell	-1.4327	IL19	-1
XCL1	-0.0024095	Central memory CD8 T cell	-1	*			Central memory CD8 T cell	-1.05316	IL19	-1
PF4	-0.0035723	Central memory CD8 T cell	-1	*			Effector memeory CD8 T cell	-0.99992	IL19	-1
CXCL9	0.00091211	Central memory CD8 T cell	1	*			Eosinophil	0.332168	IL19	1
CXCL14	0.0032213	Central memory CD8 T cell	1	*			Gamma delta T cell	-0.804991	IL19	-1
CXCL12	0.0024711	Central memory CD8 T cell	1	*			Immature dendritic cell	-1.1175	IL19	-1
CXCL10	0.0023118	Central memory CD8 T cell	1	*			Macrophage	0.671493	IL19	1
CCL4	-0.0011247	Central memory CD8 T cell	-1	*			Mast cell	0.669957	IL19	1
CCL3	-0.0018365	Central memory CD8 T cell	-1	*			MDSC	-0.486935	IL19	-1
CCL28	0.0031296	Central memory CD8 T cell	1	*			Memory B cell	-0.423564	IL19	-1
CCL25	-0.0014788	Central memory CD8 T cell	-1	*			Monocyte	-1.22613	IL19	-1
CCL24	0.0017428	Central memory CD8 T cell	1	*			Natural killer cell	-1.31211	IL19	-1
CCL15	-0.0022331	Central memory CD8 T cell	-1	*			Natural killer T cell	0.401122	IL19	1
CCL14	-0.0017875	Central memory CD8 T cell	-1	*			Neutrophil	0.724156	IL19	1
CCL13	-0.0016454	Central memory CD8 T cell	-1	*			Plasmacytoid dendritic cell	-1.05629	IL19	-1
CCL11	0.0026208	Central memory CD8 T cell	1	*			Regulatory T cell	-0.491802	IL19	-1
CCL1	-0.0032836	Central memory CD8 T cell	-1	*			Type 1 T helper cell	-0.780935	IL19	-1
CXCL13	0.0067106	Effector memeory CD4 T cell	1				Type 17 T helper cell	-0.105823	IL19	-1
CCL25	0.0071098	Effector memeory CD4 T cell	1				Type 2 T helper cell	-0.386359	IL19	-1
CCL22	0.0055942	Effector memeory CD4 T cell	1				Central memory CD4 T cell	-6.22314	IL20	-1
XCL2	-0.001677	Effector memeory CD8 T cell	-1	*			Central memory CD8 T cell	-7.07801	IL20	-1
XCL1	-0.0020362	Effector memeory CD8 T cell	-1	*			Immature B cell	3.52017	IL20	1
PPBP	-0.0006099	Effector memeory CD8 T cell	-1	*			Macrophage	4.16867	IL20	1
PF4	-0.0014099	Effector memeory CD8 T cell	-1	*			Monocyte	-5.01289	IL20	-1
CXCL9	0.00030968	Effector memeory CD8 T cell	1	*			Type 1 T helper cell	-3.80844	IL20	-1
CXCL6	0.0011403	Effector memeory CD8 T cell	1	*			Type 17 T helper cell	5.07196	IL20	1
CXCL5	0.0020199	Effector memeory CD8 T cell	1	*			Central memory CD4 T cell	-3.42796	IL21	-1
CXCL3	0.00069354	Effector memeory CD8 T cell	1	*			Immature B cell	5.8673	IL21	1
CXCL2	-0.00018145	Effector memeory CD8 T cell	-1	*			Immature dendritic cell	-5.77342	IL21	-1
CXCL16	0.00033077	Effector memeory CD8 T cell	1	*			Macrophage	5.11143	IL21	1
CXCL14	0.0024182	Effector memeory CD8 T cell	1	*			Monocyte	-4.28725	IL21	-1
CXCL12	0.0023311	Effector memeory CD8 T cell	1	*			Type 17 T helper cell	3.47769	IL21	1
CXCL10	0.00077671	Effector memeory CD8 T cell	1	*			Central memory CD4 T cell	-3.92405	IL22	-1
CXCL1	0.0018009	Effector memeory CD8 T cell	1	*			Immature B cell	3.30826	IL22	1
CX3CL1	-0.00058917	Effector memeory CD8 T cell	-1	*			Monocyte	-5.32797	IL22	-1
CCL8	-0.00083491	Effector memeory CD8 T cell	-1	*			Type 1 T helper cell	-3.0453	IL22	-1
CCL5	-0.00015609	Effector memeory CD8 T cell	-1	*			Type 17 T helper cell	4.44484	IL22	1
CCL4	-0.00072848	Effector memeory CD8 T cell	-1	*			Immature B cell	2.72308	IL23A	1
CCL3	-0.0004282	Effector memeory CD8 T cell	-1	*			Macrophage	1.85633	IL23A	1
CCL28	0.0024739	Effector memeory CD8 T cell	1	*			CD56dim natural killer cell	-1.88486	IL24	-1
CCL26	0.00029802	Effector memeory CD8 T cell	1	*			Eosinophil	1.7904	IL24	1
CCL25	-0.001365	Effector memeory CD8 T cell	-1	*			Immature B cell	3.48699	IL24	1
CCL24	0.0014395	Effector memeory CD8 T cell	1	*			Immature dendritic cell	-0.84555	IL24	-1
CCL23	-0.00043616	Effector memeory CD8 T cell	-1	*			Macrophage	2.31644	IL24	1
CCL22	0.00085986	Effector memeory CD8 T cell	1	*			Mast cell	1.49811	IL24	1
CCL21	0.0012764	Effector memeory CD8 T cell	1	*			MDSC	1.64795	IL24	1
CCL20	0.00078703	Effector memeory CD8 T cell	1	*			Monocyte	-1.3476	IL24	-1
CCL2	0.00095742	Effector memeory CD8 T cell	1	*			Natural killer cell	-0.87659	IL24	-1
CCL19	0.00036765	Effector memeory CD8 T cell	1				Plasmacytoid dendritic cell	-1.26695	IL24	-1
CCL18	0.00099201	Effector memeory CD8 T cell	1	*			Regulatory T cell	1.30147	IL24	1
CCL17	0.00098325	Effector memeory CD8 T cell	1	*			Type 1 T helper cell	-0.492	IL24	-1
CCL16	0.00098416	Effector memeory CD8 T cell	1	*			Central memory CD8 T cell	-8.6633	IL25	-1
CCL15	0.00058042	Effector memeory CD8 T cell	1	*			Immature B cell	6.65214	IL25	1
CCL14	-0.00082086	Effector memeory CD8 T cell	-1	*			Monocyte	-7.35502	IL25	-1
CCL13	-0.00081776	Effector memeory CD8 T cell	-1	*			Central memory CD4 T cell	-2.29262	IL26	-1
CCL11	0.00095827	Effector memeory CD8 T cell	1	*			Eosinophil	4.72096	IL26	1
CCL1	-0.0018289	Effector memeory CD8 T cell	-1	*			Gamma delta T cell	-2.14549	IL26	-1
XCL2	0.0060508	Eosinophil	1	*			Immature B cell	4.75549	IL26	1
CXCL13	0.0035997	Eosinophil	1				Macrophage	4.49838	IL26	1
CXCL11	0.0065336	Eosinophil	1	*			Monocyte	-2.71313	IL26	-1
CX3CL1	0.0035376	Eosinophil	1	*			Natural killer cell	-2.23233	IL26	-1
CCL8	0.0060166	Eosinophil	1	*			Natural killer T cell	1.40488	IL26	1
CCL5	0.0052988	Eosinophil	1	*			Type 1 T helper cell	-1.53641	IL26	-1
CCL3	0.0042252	Eosinophil	1	*			Activated dendritic cell	1.05504	IL27	1
CCL13	-0.004188	Eosinophil	-1	*			CD56bright natural killer cell	-1.48712	IL27	-1
XCL2	-0.0014205	Gamma delta T cell	-1	*			CD56dim natural killer cell	-2.54712	IL27	-1
XCL1	-0.0017101	Gamma delta T cell	-1	*			Central memory CD4 T cell	-3.2518	IL27	-1
PPBP	-0.00060011	Gamma delta T cell	-1	*			Central memory CD8 T cell	-2.857	IL27	-1
PF4	-0.0011482	Gamma delta T cell	-1	*			Effector memeory CD8 T cell	-1.37453	IL27	-1
CXCL9	0.00021813	Gamma delta T cell	1	*			Gamma delta T cell	-1.54434	IL27	-1
CXCL6	0.00093076	Gamma delta T cell	1	*			Immature B cell	2.72371	IL27	1
CXCL5	0.0016463	Gamma delta T cell	1	*			Immature dendritic cell	-2.35486	IL27	-1
CXCL3	0.00052156	Gamma delta T cell	1	*			Macrophage	2.81829	IL27	1
CXCL2	-0.00013761	Gamma delta T cell	-1	*			Mast cell	1.99467	IL27	1
CXCL16	0.00025269	Gamma delta T cell	1	*			Monocyte	-3.12501	IL27	-1
CXCL14	0.0019499	Gamma delta T cell	1	*			Natural killer cell	-2.57304	IL27	-1
CXCL12	0.0019245	Gamma delta T cell	1	*			Natural killer T cell	1.17528	IL27	1
CXCL10	0.00055926	Gamma delta T cell	1	*			Plasmacytoid dendritic cell	-2.07533	IL27	-1
CXCL1	0.0014807	Gamma delta T cell	1	*			Type 1 T helper cell	-1.7716	IL27	-1
CX3CL1	-0.00057975	Gamma delta T cell	-1	*			Type 2 T helper cell	-0.846066	IL27	-1
CCL8	-0.00077898	Gamma delta T cell	-1	*			Central memory CD4 T cell	-4.46032	IL31	-1
CCL5	-0.00016647	Gamma delta T cell	-1	*			Central memory CD8 T cell	-6.8587	IL31	-1
CCL4	-0.00061795	Gamma delta T cell	-1	*			Eosinophil	-4.42897	IL31	-1
CCL3	-0.00033276	Gamma delta T cell	-1	*			Macrophage	5.47412	IL31	1
CCL28	0.0019834	Gamma delta T cell	1	*			Plasmacytoid dendritic cell	5.75746	IL31	1
CCL26	0.00037136	Gamma delta T cell	1	*			Type 17 T helper cell	7.47775	IL31	1
CCL25	-0.0010496	Gamma delta T cell	-1	*			Natural killer T cell	9.62491	IL32	1
CCL24	0.0011779	Gamma delta T cell	1	*			Plasmacytoid dendritic cell	-10.6469	IL32	-1
CCL23	-0.00036851	Gamma delta T cell	-1	*			Type 1 T helper cell	-8.99988	IL32	-1
CCL22	0.00060892	Gamma delta T cell	1	*			Activated B cell	-2.93536	IL33	-1
CCL21	0.0011347	Gamma delta T cell	1	*			Activated dendritic cell	-1.51205	IL33	-1
CCL20	0.00069293	Gamma delta T cell	1	*			CD56dim natural killer cell	4.04842	IL33	1
CCL2	0.00087639	Gamma delta T cell	1	*			Mast cell	-1.34423	IL33	-1
CCL18	0.00081637	Gamma delta T cell	1	*			Monocyte	1.23339	IL33	1
CCL17	0.00076607	Gamma delta T cell	1	*			CD56dim natural killer cell	3.12664	IL34	1
CCL16	0.00086904	Gamma delta T cell	1	*			Central memory CD4 T cell	-1.96691	IL34	-1
CCL15	0.00051107	Gamma delta T cell	1	*			Immature B cell	2.82353	IL34	1
CCL14	-0.00065499	Gamma delta T cell	-1	*			Macrophage	2.78919	IL34	1
CCL13	-0.00065297	Gamma delta T cell	-1	*			MDSC	3.43721	IL34	1
CCL11	0.00075981	Gamma delta T cell	1	*			Memory B cell	-2.03545	IL34	-1
CCL1	-0.0015065	Gamma delta T cell	-1	*			Natural killer T cell	1.81638	IL34	1
CXCL9	0.0031897	Immature B cell	1				Type 1 T helper cell	-1.8744	IL34	-1
CXCL16	0.0015729	Immature B cell	1				Central memory CD8 T cell	-4.50756	IL14	-1
CXCL10	0.0043367	Immature B cell	1				Gamma delta T cell	3.98578	IL14	1
CCL4	0.0030247	Immature B cell	1				Macrophage	-2.71251	IL14	-1
CCL22	0.0043929	Immature B cell	1				MDSC	-5.98973	IL14	-1
CCL19	0.0059106	Immature B cell	1				Natural killer cell	3.16709	IL14	1
CCL18	0.0065684	Immature B cell	1				Natural killer T cell	-3.40619	IL14	-1
XCL2	-0.0019438	Immature dendritic cell	-1	*			Neutrophil	-3.20749	IL14	-1
XCL1	-0.002271	Immature dendritic cell	-1	*			Regulatory T cell	4.56445	IL14	1
PPBP	-0.00079475	Immature dendritic cell	-1	*			* Statistically significant immune cells and interleukins in EAG to T1/2
PF4	-0.0015925	Immature dendritic cell	-1	*
CXCL9	0.00029079	Immature dendritic cell	1	*
CXCL6	0.0012152	Immature dendritic cell	1	*
CXCL5	0.0022509	Immature dendritic cell	1	*
CXCL3	0.00070312	Immature dendritic cell	1	*
CXCL2	-0.00025012	Immature dendritic cell	-1	*
CXCL16	0.00036512	Immature dendritic cell	1	*
CXCL14	0.0026614	Immature dendritic cell	1	*
CXCL12	0.0025957	Immature dendritic cell	1	*
CXCL11	-0.00028471	Immature dendritic cell	-1	*
CXCL10	0.00081603	Immature dendritic cell	1	*
CXCL1	0.0020244	Immature dendritic cell	1	*
CX3CL1	-0.00067522	Immature dendritic cell	-1	*
CCL8	-0.0010333	Immature dendritic cell	-1	*
CCL5	-0.00021695	Immature dendritic cell	-1	*
CCL4	-0.00083055	Immature dendritic cell	-1	*
CCL3	-0.00054366	Immature dendritic cell	-1	*
CCL28	0.002709	Immature dendritic cell	1	*
CCL26	0.00029337	Immature dendritic cell	1	*
CCL25	-0.0015046	Immature dendritic cell	-1	*
CCL24	0.0015734	Immature dendritic cell	1	*
CCL23	-0.00049444	Immature dendritic cell	-1	*
CCL22	0.00086956	Immature dendritic cell	1	*
CCL21	0.0013493	Immature dendritic cell	1	*
CCL20	0.00076076	Immature dendritic cell	1	*
CCL2	0.0010488	Immature dendritic cell	1	*
CCL19	0.00029778	Immature dendritic cell	1
CCL18	0.00099997	Immature dendritic cell	1	*
CCL17	0.0010956	Immature dendritic cell	1	*
CCL16	0.0010633	Immature dendritic cell	1	*
CCL15	0.0006078	Immature dendritic cell	1	*
CCL14	-0.00092188	Immature dendritic cell	-1	*
CCL13	-0.00091122	Immature dendritic cell	-1	*
CCL11	0.0010437	Immature dendritic cell	1	*
CCL1	-0.0020486	Immature dendritic cell	-1	*
XCL1	0.00300308	Macrophage	1	*
CXCL9	0.0015985	Macrophage	1	*
CXCL12	-0.00299019	Macrophage	-1	*
CX3CL1	0.0017999	Macrophage	1	*
CCL4	0.00311891	Macrophage	1	*
CCL28	-0.00323374	Macrophage	-1	*
CCL17	0.00414742	Macrophage	1	*
CCL16	-0.00281654	Macrophage	-1	*
CCL14	0.00248383	Macrophage	1	*
CCL13	0.00237564	Macrophage	1	*
CCL1	0.00256672	Macrophage	1	*
XCL2	0.0011406	Mast cell	1	*
XCL1	0.0014411	Mast cell	1	*
PPBP	0.00052432	Mast cell	1	*
PF4	0.0010239	Mast cell	1	*
CXCL9	-0.00017159	Mast cell	-1	*
CXCL6	-0.00079738	Mast cell	-1	*
CXCL5	-0.0012857	Mast cell	-1	*
CXCL3	-0.00045661	Mast cell	-1	*
CXCL2	0.00019218	Mast cell	1	*
CXCL16	-0.00017951	Mast cell	-1	*
CXCL14	-0.0016555	Mast cell	-1	*
CXCL12	-0.0016284	Mast cell	-1	*
CXCL10	-0.00045048	Mast cell	-1	*
CXCL1	-0.0011972	Mast cell	-1	*
CX3CL1	0.00041599	Mast cell	1	*
CCL8	0.00063075	Mast cell	1	*
CCL4	0.00058134	Mast cell	1	*
CCL3	0.00029981	Mast cell	1	*
CCL28	-0.001685	Mast cell	-1	*
CCL26	-0.00025279	Mast cell	-1	*
CCL25	0.00098136	Mast cell	1	*
CCL24	-0.00095455	Mast cell	-1	*
CCL23	0.00032191	Mast cell	1	*
CCL22	-0.00051406	Mast cell	-1	*
CCL21	-0.00085568	Mast cell	-1	*
CCL20	-0.00054253	Mast cell	-1	*
CCL2	-0.00064515	Mast cell	-1	*
CCL18	-0.00055815	Mast cell	-1	*
CCL17	-0.0006706	Mast cell	-1	*
CCL16	-0.00073601	Mast cell	-1	*
CCL15	-0.00043038	Mast cell	-1	*
CCL14	0.00061763	Mast cell	1	*
CCL13	0.00063182	Mast cell	1	*
CCL11	-0.00060058	Mast cell	-1	*
CCL1	0.0012747	Mast cell	1	*
CXCL14	0.007775	MDSC	1	*
CXCL11	0.015042	MDSC	1	*
CCL22	0.010596	MDSC	1	*
XCL2	0.0035157	Memory B cell	1	*
XCL1	-0.0010969	Memory B cell	-1	*
PF4	0.0018916	Memory B cell	1	*
CXCL2	0.0014038	Memory B cell	1	*
CXCL13	0.0035503	Memory B cell	1
CX3CL1	-0.0016574	Memory B cell	-1	*
CCL3	0.0024388	Memory B cell	1	*
CCL26	0.0023462	Memory B cell	1	*
CCL24	0.0013805	Memory B cell	1	*
CCL21	0.0059748	Memory B cell	1	*
CCL2	0.0048726	Memory B cell	1	*
CCL18	0.0047136	Memory B cell	1	*
CCL15	0.003213	Memory B cell	1	*
XCL2	-0.0042459	Monocyte	-1	*
XCL1	-0.0041126	Monocyte	-1	*
CXCL12	0.0068821	Monocyte	1	*
CCL23	-0.0051332	Monocyte	-1	*
CCL22	0.0067032	Monocyte	1	*
CCL13	-0.0041291	Monocyte	-1	*
CCL1	-0.0086525	Monocyte	-1	*
XCL2	-0.0022182	Natural killer cell	-1	*
XCL1	-0.0027431	Natural killer cell	-1	*
PPBP	-0.00093371	Natural killer cell	-1	*
PF4	-0.0019101	Natural killer cell	-1	*
CXCL9	0.00033183	Natural killer cell	1	*
CXCL6	0.0014301	Natural killer cell	1	*
CXCL5	0.0025844	Natural killer cell	1	*
CXCL3	0.0008357	Natural killer cell	1	*
CXCL2	-0.00026913	Natural killer cell	-1	*
CXCL16	0.00039789	Natural killer cell	1	*
CXCL14	0.0031463	Natural killer cell	1	*
CXCL12	0.0031142	Natural killer cell	1	*
CXCL11	-0.00035062	Natural killer cell	-1	*
CXCL10	0.00091289	Natural killer cell	1	*
CXCL1	0.002377	Natural killer cell	1	*
CX3CL1	-0.00086194	Natural killer cell	-1	*
CCL8	-0.0012168	Natural killer cell	-1	*
CCL5	-0.00026915	Natural killer cell	-1	*
CCL4	-0.00099419	Natural killer cell	-1	*
CCL3	-0.00059848	Natural killer cell	-1	*
CCL28	0.0032547	Natural killer cell	1	*
CCL26	0.00045981	Natural killer cell	1	*
CCL25	-0.0017774	Natural killer cell	-1	*
CCL24	0.0018857	Natural killer cell	1	*
CCL23	-0.00063121	Natural killer cell	-1	*
CCL22	0.00094766	Natural killer cell	1	*
CCL21	0.001681	Natural killer cell	1	*
CCL20	0.00091173	Natural killer cell	1	*
CCL2	0.0012721	Natural killer cell	1	*
CCL18	0.0012258	Natural killer cell	1	*
CCL17	0.0012829	Natural killer cell	1	*
CCL16	0.0013292	Natural killer cell	1	*
CCL15	0.00081841	Natural killer cell	1	*
CCL14	-0.0010949	Natural killer cell	-1	*
CCL13	-0.0011002	Natural killer cell	-1	*
CCL11	0.0012427	Natural killer cell	1	*
CCL1	-0.0024529	Natural killer cell	-1	*
XCL2	-0.0022235	Natural killer T cell	-1	*
XCL1	0.0017191	Natural killer T cell	1	*
CXCL12	-0.0012792	Natural killer T cell	-1	*
CXCL10	0.0018534	Natural killer T cell	1	*
CX3CL1	0.001053	Natural killer T cell	1	*
CCL3	-0.0014149	Natural killer T cell	-1	*
CCL28	-0.0022499	Natural killer T cell	-1	*
CCL26	-0.0013624	Natural killer T cell	-1	*
CCL23	0.0021071	Natural killer T cell	1	*
CCL22	0.0021224	Natural killer T cell	1	*
CCL21	-0.0020924	Natural killer T cell	-1	*
CCL16	-0.0013064	Natural killer T cell	-1	*
CCL15	-0.0020536	Natural killer T cell	-1	*
CCL1	0.00092962	Natural killer T cell	1	*
XCL2	0.0010279	Neutrophil	1	*
XCL1	0.0013032	Neutrophil	1	*
PPBP	0.00038896	Neutrophil	1	*
PF4	0.0010233	Neutrophil	1	*
CXCL6	-0.00071953	Neutrophil	-1	*
CXCL5	-0.0010938	Neutrophil	-1	*
CXCL3	-0.00034468	Neutrophil	-1	*
CXCL16	-0.00013377	Neutrophil	-1	*
CXCL14	-0.0015035	Neutrophil	-1	*
CXCL12	-0.0015562	Neutrophil	-1	*
CXCL10	-0.00033079	Neutrophil	-1	*
CXCL1	-0.0010769	Neutrophil	-1	*
CX3CL1	0.00043027	Neutrophil	1	*
CCL8	0.00062751	Neutrophil	1	*
CCL5	0.00015885	Neutrophil	1	*
CCL4	0.00057629	Neutrophil	1	*
CCL3	0.0002991	Neutrophil	1	*
CCL28	-0.0015739	Neutrophil	-1	*
CCL26	-0.0002066	Neutrophil	-1	*
CCL25	0.0010731	Neutrophil	1	*
CCL24	-0.00081654	Neutrophil	-1	*
CCL23	0.00027809	Neutrophil	1	*
CCL22	-0.00040836	Neutrophil	-1	*
CCL21	-0.00081968	Neutrophil	-1	*
CCL2	-0.00055488	Neutrophil	-1	*
CCL18	-0.00049882	Neutrophil	-1	*
CCL17	-0.00069255	Neutrophil	-1	*
CCL16	-0.0006939	Neutrophil	-1	*
CCL15	-0.00034743	Neutrophil	-1	*
CCL14	0.00058929	Neutrophil	1	*
CCL13	0.00058635	Neutrophil	1	*
CCL11	-0.00061555	Neutrophil	-1	*
CCL1	0.0012062	Neutrophil	1	*
XCL2	-0.0018485	Plasmacytoid dendritic cell	-1	*
XCL1	-0.0022626	Plasmacytoid dendritic cell	-1	*
PPBP	-0.00069258	Plasmacytoid dendritic cell	-1	*
PF4	-0.0015093	Plasmacytoid dendritic cell	-1	*
CXCL9	0.00026265	Plasmacytoid dendritic cell	1	*
CXCL6	0.0012157	Plasmacytoid dendritic cell	1	*
CXCL5	0.0020589	Plasmacytoid dendritic cell	1	*
CXCL3	0.0006954	Plasmacytoid dendritic cell	1	*
CXCL2	-0.00024371	Plasmacytoid dendritic cell	-1	*
CXCL16	0.00032542	Plasmacytoid dendritic cell	1	*
CXCL14	0.0026013	Plasmacytoid dendritic cell	1	*
CXCL12	0.0025424	Plasmacytoid dendritic cell	1	*
CXCL11	-0.00034906	Plasmacytoid dendritic cell	-1	*
CXCL10	0.00075932	Plasmacytoid dendritic cell	1	*
CXCL1	0.0019622	Plasmacytoid dendritic cell	1	*
CX3CL1	-0.00071875	Plasmacytoid dendritic cell	-1	*
CCL8	-0.0010229	Plasmacytoid dendritic cell	-1	*
CCL5	-0.0002538	Plasmacytoid dendritic cell	-1	*
CCL4	-0.00081322	Plasmacytoid dendritic cell	-1	*
CCL3	-0.00050491	Plasmacytoid dendritic cell	-1	*
CCL28	0.0027057	Plasmacytoid dendritic cell	1	*
CCL26	0.00041089	Plasmacytoid dendritic cell	1	*
CCL25	-0.0014653	Plasmacytoid dendritic cell	-1	*
CCL24	0.0015199	Plasmacytoid dendritic cell	1	*
CCL23	-0.00049829	Plasmacytoid dendritic cell	-1	*
CCL22	0.00082575	Plasmacytoid dendritic cell	1	*
CCL21	0.0013934	Plasmacytoid dendritic cell	1	*
CCL20	0.00078175	Plasmacytoid dendritic cell	1	*
CCL2	0.0010542	Plasmacytoid dendritic cell	1	*
CCL19	0.00032031	Plasmacytoid dendritic cell	1
CCL18	0.001081	Plasmacytoid dendritic cell	1	*
CCL17	0.0010397	Plasmacytoid dendritic cell	1	*
CCL16	0.0010885	Plasmacytoid dendritic cell	1	*
CCL15	0.00069337	Plasmacytoid dendritic cell	1	*
CCL14	-0.00087546	Plasmacytoid dendritic cell	-1	*
CCL13	-0.00083958	Plasmacytoid dendritic cell	-1	*
CCL11	0.00099938	Plasmacytoid dendritic cell	1	*
CCL1	-0.0019991	Plasmacytoid dendritic cell	-1	*
XCL2	-0.00095342	Regulatory T cell	-1	*
XCL1	-0.0010324	Regulatory T cell	-1	*
PF4	-0.00075788	Regulatory T cell	-1	*
CXCL6	0.00054632	Regulatory T cell	1	*
CXCL5	0.0010559	Regulatory T cell	1	*
CXCL3	0.000281	Regulatory T cell	1	*
CXCL16	0.00018884	Regulatory T cell	1	*
CXCL14	0.0011502	Regulatory T cell	1	*
CXCL12	0.0011528	Regulatory T cell	1	*
CXCL10	0.00039903	Regulatory T cell	1	*
CXCL1	0.0009359	Regulatory T cell	1	*
CX3CL1	-0.00036293	Regulatory T cell	-1	*
CCL8	-0.00047202	Regulatory T cell	-1	*
CCL5	-0.00013204	Regulatory T cell	-1	*
CCL4	-0.00030203	Regulatory T cell	-1	*
CCL3	-0.00028215	Regulatory T cell	-1	*
CCL28	0.0012113	Regulatory T cell	1	*
CCL26	0.00016248	Regulatory T cell	1	*
CCL25	-0.00070007	Regulatory T cell	-1	*
CCL24	0.0007345	Regulatory T cell	1	*
CCL23	-0.00023876	Regulatory T cell	-1	*
CCL22	0.00045439	Regulatory T cell	1	*
CCL21	0.00065673	Regulatory T cell	1	*
CCL20	0.00037351	Regulatory T cell	1	*
CCL2	0.00044962	Regulatory T cell	1	*
CCL19	0.00017462	Regulatory T cell	1
CCL18	0.0006129	Regulatory T cell	1	*
CCL17	0.00043004	Regulatory T cell	1	*
CCL16	0.00041915	Regulatory T cell	1	*
CCL15	0.00032826	Regulatory T cell	1	*
CCL14	-0.00038796	Regulatory T cell	-1	*
CCL13	-0.0003754	Regulatory T cell	-1	*
CCL11	0.00048593	Regulatory T cell	1	*
CCL1	-0.00096205	Regulatory T cell	-1	*
XCL1	0.00096315	T follicular helper cell	1
CXCL9	0.0009801	T follicular helper cell	1
CXCL13	0.0019426	T follicular helper cell	1
CXCL11	0.0020536	T follicular helper cell	1
CCL19	0.001657	T follicular helper cell	1
XCL2	-0.0012897	Type 1 T helper cell	-1	*
XCL1	-0.0016151	Type 1 T helper cell	-1	*
PPBP	-0.00046906	Type 1 T helper cell	-1	*
PF4	-0.0011704	Type 1 T helper cell	-1	*
CXCL9	0.0002123	Type 1 T helper cell	1	*
CXCL6	0.00084318	Type 1 T helper cell	1	*
CXCL5	0.0014869	Type 1 T helper cell	1	*
CXCL3	0.00049368	Type 1 T helper cell	1	*
CXCL2	-0.00016406	Type 1 T helper cell	-1	*
CXCL16	0.00022478	Type 1 T helper cell	1	*
CXCL14	0.0018792	Type 1 T helper cell	1	*
CXCL12	0.0018184	Type 1 T helper cell	1	*
CXCL10	0.00057423	Type 1 T helper cell	1	*
CXCL1	0.0013584	Type 1 T helper cell	1	*
CX3CL1	-0.00048656	Type 1 T helper cell	-1	*
CCL8	-0.00067981	Type 1 T helper cell	-1	*
CCL5	-0.0001437	Type 1 T helper cell	-1	*
CCL4	-0.00060155	Type 1 T helper cell	-1	*
CCL3	-0.00037682	Type 1 T helper cell	-1	*
CCL28	0.0019155	Type 1 T helper cell	1	*
CCL26	0.00023425	Type 1 T helper cell	1	*
CCL25	-0.0010566	Type 1 T helper cell	-1	*
CCL24	0.0011017	Type 1 T helper cell	1	*
CCL23	-0.00031409	Type 1 T helper cell	-1	*
CCL22	0.00063857	Type 1 T helper cell	1	*
CCL21	0.00096658	Type 1 T helper cell	1	*
CCL20	0.00054041	Type 1 T helper cell	1	*
CCL2	0.00070758	Type 1 T helper cell	1	*
CCL19	0.00021964	Type 1 T helper cell	1
CCL18	0.00063128	Type 1 T helper cell	1	*
CCL17	0.00076521	Type 1 T helper cell	1	*
CCL16	0.00076889	Type 1 T helper cell	1	*
CCL15	0.00042873	Type 1 T helper cell	1	*
CCL14	-0.000678	Type 1 T helper cell	-1	*
CCL13	-0.00066394	Type 1 T helper cell	-1	*
CCL11	0.00078109	Type 1 T helper cell	1	*
CCL1	-0.0014584	Type 1 T helper cell	-1	*
XCL2	-0.0015828	Type 2 T helper cell	-1	*
XCL1	-0.00088258	Type 2 T helper cell	-1	*
CXCL5	0.0030784	Type 2 T helper cell	1	*
CCL3	-0.0011145	Type 2 T helper cell	-1	*
CCL28	0.0017761	Type 2 T helper cell	1	*
CCL21	-0.0020117	Type 2 T helper cell	-1	*
CCL2	-0.0021224	Type 2 T helper cell	-1	*
CCL1	-0.00084193	Type 2 T helper cell	-1	*
PF4	0.0011167	Type 17 T helper cell	1	*
CXCL3	0.0006136	Type 17 T helper cell	1	*
CXCL13	0.001338	Type 17 T helper cell	1
CCL3	0.0009496	Type 17 T helper cell	1	*
CCL21	0.0017466	Type 17 T helper cell	1	*
CCL2	0.0015042	Type 17 T helper cell	1	*
CCL18	0.0031454	Type 17 T helper cell	1	*
CCL15	0.001778	Type 17 T helper cell	1	*
* Statistically significant immune cells and chemokines in EAG to T1/2

## Sheet: T12 to T34
Table S8-5-1 The results of correlation between chemokines and immune cells from T1/2 to T3/4 by PLSR						Table S8-5-2 The results of correlation between immune cells and interleukins from T1/2 to T3/4 by PLSR
Chemokine	Estimate	Immune Cell	Sign			Immune Cell	Estimate	Interleukin	Sign
CCL3	-0.00316935	Activated B cell	-1			Activated B cell	-1.78117	IL1A	-1
CCL28	-0.0031657	Activated B cell	-1			Central memory CD4 T cell	2.49411	IL1A	1
CCL21	0.00824417	Activated B cell	1			Effector memeory CD4 T cell	-2.11089	IL1A	-1
CCL5	0.018506	Activated CD4 T cell	1			Eosinophil	5.98496	IL1A	1
CCL4	0.026176	Activated CD4 T cell	1			Gamma delta T cell	-1.99349	IL1A	-1
CCL20	0.0045619	Activated CD4 T cell	1			Plasmacytoid dendritic cell	-4.28896	IL1A	-1
PPBP	-0.0030808	Activated CD8 T cell	-1			Regulatory T cell	-2.69863	IL1A	-1
CXCL5	0.0018784	Activated CD8 T cell	1			T follicular helper cell	2.17675	IL1A	1
CXCL2	-0.00087116	Activated CD8 T cell	-1			Type 17 T helper cell	-2.4606	IL1A	-1
CXCL14	0.0018476	Activated CD8 T cell	1			Activated CD8 T cell	0.440365	IL1B	1
CXCL13	-0.00097729	Activated CD8 T cell	-1			CD56dim natural killer cell	1.50143	IL1B	1
CXCL1	0.0015541	Activated CD8 T cell	1			Effector memeory CD8 T cell	0.827876	IL1B	1
CCL4	0.00050148	Activated CD8 T cell	1			Gamma delta T cell	-0.555675	IL1B	-1
CCL3	-0.0017663	Activated CD8 T cell	-1			Immature dendritic cell	0.444431	IL1B	1
CCL28	0.0038643	Activated CD8 T cell	1			Macrophage	0.700008	IL1B	1
CCL24	0.0016936	Activated CD8 T cell	1			MDSC	0.561412	IL1B	1
CCL21	-0.0021556	Activated CD8 T cell	-1			Memory B cell	-0.60416	IL1B	-1
CCL20	-0.0026578	Activated CD8 T cell	-1			Type 1 T helper cell	-0.300133	IL1B	-1
CCL2	-0.0014236	Activated CD8 T cell	-1			Type 2 T helper cell	0.546395	IL1B	1
CCL14	0.00093058	Activated CD8 T cell	1			Activated dendritic cell	2.0248	IL2	1
CCL13	0.00096505	Activated CD8 T cell	1			CD56bright natural killer cell	2.84083	IL2	1
XCL2	0.00236508	Activated dendritic cell	1			CD56dim natural killer cell	3.18722	IL2	1
CCL5	0.00175533	Activated dendritic cell	1			Effector memeory CD4 T cell	2.50379	IL2	1
CCL3	0.00596924	Activated dendritic cell	1			Eosinophil	-1.70995	IL2	-1
CCL21	0.00254303	Activated dendritic cell	1			Gamma delta T cell	-2.97785	IL2	-1
CCL20	0.00368178	Activated dendritic cell	1			Immature B cell	2.19181	IL2	1
CCL13	-0.00227355	Activated dendritic cell	-1			MDSC	3.34178	IL2	1
CCL1	-0.00170062	Activated dendritic cell	-1			Natural killer cell	2.20716	IL2	1
XCL1	-0.00766069	CD56bright natural killer cell	-1			Neutrophil	2.3031	IL2	1
PPBP	-0.00324208	CD56bright natural killer cell	-1			T follicular helper cell	-2.71552	IL2	-1
PF4	-0.00741332	CD56bright natural killer cell	-1			CD56dim natural killer cell	1.48704	IL3	1
CXCL9	0.00599434	CD56bright natural killer cell	1			Effector memeory CD4 T cell	2.00938	IL3	1
CXCL2	-0.00890856	CD56bright natural killer cell	-1			Eosinophil	-2.10521	IL3	-1
CXCL12	-0.00849216	CD56bright natural killer cell	-1			Immature B cell	2.32622	IL3	1
CCL22	-0.00336971	CD56bright natural killer cell	-1			Mast cell	-3.48954	IL3	-1
CCL14	0.00825403	CD56bright natural killer cell	1			MDSC	-1.74762	IL3	-1
CXCL2	-0.022976	CD56dim natural killer cell	-1			Natural killer cell	2.15602	IL3	1
CCL5	0.023688	CD56dim natural killer cell	1			Plasmacytoid dendritic cell	3.07212	IL3	1
CCL4	0.017246	CD56dim natural killer cell	1			Regulatory T cell	3.54206	IL3	1
CCL3	-0.011447	CD56dim natural killer cell	-1			Type 2 T helper cell	1.2542	IL3	1
CCL25	-0.012903	CD56dim natural killer cell	-1			Activated dendritic cell	-0.85181	IL4	-1
CCL20	0.0038105	CD56dim natural killer cell	1			CD56bright natural killer cell	1.3731	IL4	1
CCL18	0.0044394	CD56dim natural killer cell	1			CD56dim natural killer cell	1.69324	IL4	1
CCL13	-0.014448	CD56dim natural killer cell	-1			Effector memeory CD8 T cell	1.10888	IL4	1
CCL1	0.034742	CD56dim natural killer cell	1			Eosinophil	1.06967	IL4	1
XCL1	-0.013315	Central memory CD4 T cell	-1			Gamma delta T cell	-1.11012	IL4	-1
CCL18	0.0030337	Central memory CD4 T cell	1			Macrophage	1.20085	IL4	1
CCL14	0.0089569	Central memory CD4 T cell	1			Mast cell	-1.39143	IL4	-1
CCL13	-0.0088252	Central memory CD4 T cell	-1			Regulatory T cell	-1.57544	IL4	-1
XCL2	-0.0010872	Central memory CD8 T cell	-1			Type 2 T helper cell	0.931234	IL4	1
XCL1	0.00059228	Central memory CD8 T cell	1			Activated B cell	4.24203	IL5	1
PPBP	-0.0017707	Central memory CD8 T cell	-1			Activated CD8 T cell	-3.02613	IL5	-1
CXCL5	0.0010501	Central memory CD8 T cell	1			Effector memeory CD8 T cell	4.87958	IL5	1
CXCL2	-0.00022449	Central memory CD8 T cell	-1			Macrophage	5.97304	IL5	1
CXCL13	-0.00045544	Central memory CD8 T cell	-1	*		MDSC	-3.49338	IL5	-1
CXCL11	0.00059599	Central memory CD8 T cell	1			Natural killer cell	-6.21295	IL5	-1
CXCL10	0.00082793	Central memory CD8 T cell	1			Natural killer T cell	5.01429	IL5	1
CX3CL1	0.00052367	Central memory CD8 T cell	1			Plasmacytoid dendritic cell	-4.21199	IL5	-1
CCL8	0.00057404	Central memory CD8 T cell	1			Type 17 T helper cell	-4.08191	IL5	-1
CCL5	0.00035144	Central memory CD8 T cell	1			Gamma delta T cell	7.96455	IL6	1
CCL3	-0.00075109	Central memory CD8 T cell	-1	*		MDSC	-5.3807	IL6	-1
CCL26	-0.00069504	Central memory CD8 T cell	-1			Memory B cell	-5.50578	IL6	-1
CCL21	-0.0019663	Central memory CD8 T cell	-1	*		Monocyte	-8.37314	IL6	-1
CCL20	-0.0013146	Central memory CD8 T cell	-1			Neutrophil	-7.23899	IL6	-1
CCL2	-0.0012992	Central memory CD8 T cell	-1			CD56dim natural killer cell	1.76999	IL7	1
CCL18	-0.0014155	Central memory CD8 T cell	-1			Gamma delta T cell	-2.16208	IL7	-1
CCL15	-0.0013467	Central memory CD8 T cell	-1			Immature B cell	1.40735	IL7	1
CCL1	0.00024336	Central memory CD8 T cell	1			Macrophage	1.56402	IL7	1
XCL2	-0.00386748	Effector memeory CD4 T cell	-1			Mast cell	-1.78574	IL7	-1
CXCL9	0.0097215	Effector memeory CD4 T cell	1			MDSC	2.03618	IL7	1
CCL8	-0.00869412	Effector memeory CD4 T cell	-1			Memory B cell	-1.53282	IL7	-1
CCL5	-0.0138816	Effector memeory CD4 T cell	-1			Natural killer cell	1.35658	IL7	1
CCL3	0.00767194	Effector memeory CD4 T cell	1			Neutrophil	2.15093	IL7	1
CCL25	0.0084984	Effector memeory CD4 T cell	1			T follicular helper cell	-1.40999	IL7	-1
CCL16	-0.00297759	Effector memeory CD4 T cell	-1			Activated CD4 T cell	7.07434	IL10	1
XCL2	0.0023008	Effector memeory CD8 T cell	1			Monocyte	-13.684	IL10	-1
CXCL5	0.0045127	Effector memeory CD8 T cell	1			Activated B cell	10.2135	IL11	1
CXCL3	0.0012725	Effector memeory CD8 T cell	1			Activated CD8 T cell	-10.97	IL11	-1
CXCL2	-0.0022908	Effector memeory CD8 T cell	-1			Immature dendritic cell	-12.1242	IL11	-1
CXCL11	0.0019147	Effector memeory CD8 T cell	1			Natural killer cell	-10.8808	IL11	-1
CCL8	0.0019304	Effector memeory CD8 T cell	1			Natural killer T cell	18.0671	IL11	1
CCL4	0.0013673	Effector memeory CD8 T cell	1			Activated CD4 T cell	3.32861	IL12A	1
CCL28	0.0037973	Effector memeory CD8 T cell	1			Activated CD8 T cell	2.52663	IL12A	1
CCL26	-0.0026706	Effector memeory CD8 T cell	-1			Effector memeory CD4 T cell	4.33014	IL12A	1
CCL25	-0.0015027	Effector memeory CD8 T cell	-1			Effector memeory CD8 T cell	-4.39863	IL12A	-1
CCL21	-0.0022501	Effector memeory CD8 T cell	-1			Eosinophil	-5.06272	IL12A	-1
CCL19	0.0025464	Effector memeory CD8 T cell	1			Immature B cell	-2.91213	IL12A	-1
CCL15	0.0028383	Effector memeory CD8 T cell	1			Mast cell	3.49524	IL12A	1
CCL1	0.0010135	Effector memeory CD8 T cell	1			Natural killer cell	5.83061	IL12A	1
XCL2	0.00389773	Eosinophil	1			Plasmacytoid dendritic cell	4.20394	IL12A	1
CXCL13	0.00375647	Eosinophil	1			Regulatory T cell	-3.24372	IL12A	-1
CXCL11	0.00617622	Eosinophil	1			T follicular helper cell	-2.25872	IL12A	-1
CXCL10	-0.00458285	Eosinophil	-1			Type 1 T helper cell	3.23176	IL12A	1
CX3CL1	0.0102033	Eosinophil	1			Type 2 T helper cell	-3.12388	IL12A	-1
CCL8	0.00742437	Eosinophil	1			Activated B cell	-2.78237	IL12B	-1
CCL5	0.00804889	Eosinophil	1			Activated dendritic cell	2.90435	IL12B	1
CCL4	-0.00681323	Eosinophil	-1			Effector memeory CD4 T cell	3.98125	IL12B	1
CCL3	0.00722027	Eosinophil	1			Eosinophil	2.38194	IL12B	1
CCL14	-0.00444665	Eosinophil	1			Gamma delta T cell	4.06662	IL12B	1
CCL13	-0.00798284	Eosinophil	-1			Macrophage	-2.75211	IL12B	-1
XCL2	-0.0024756	Gamma delta T cell	-1			MDSC	-6.80306	IL12B	-1
XCL1	-0.0020631	Gamma delta T cell	-1			Monocyte	4.24316	IL12B	1
PPBP	-0.0024574	Gamma delta T cell	-1			Type 1 T helper cell	-6.55462	IL12B	-1
CXCL11	-0.0018707	Gamma delta T cell	-1			Gamma delta T cell	-8.14153	IL13	-1
CX3CL1	-0.0029142	Gamma delta T cell	-1			Immature dendritic cell	5.60999	IL13	1
CCL8	-0.0019141	Gamma delta T cell	-1			Monocyte	-6.35697	IL13	-1
CCL5	-0.0018799	Gamma delta T cell	-1			Natural killer T cell	-14.8216	IL13	-1
CCL28	-0.0045501	Gamma delta T cell	-1			Neutrophil	-5.71678	IL13	-1
CCL26	0.0025862	Gamma delta T cell	1			Plasmacytoid dendritic cell	9.598	IL13	1
CCL21	0.0046976	Gamma delta T cell	1			T follicular helper cell	6.0189	IL13	1
CCL20	0.0045559	Gamma delta T cell	1			Type 17 T helper cell	8.88477	IL13	1
CCL19	-0.0028949	Gamma delta T cell	-1			Type 2 T helper cell	-9.35953	IL13	-1
CCL18	0.0028417	Gamma delta T cell	1			Central memory CD4 T cell	-4.19065	IL15	-1
CCL14	0.0019204	Gamma delta T cell	1			Effector memeory CD4 T cell	4.87918	IL15	1
CCL13	0.0034108	Gamma delta T cell	1			Gamma delta T cell	5.01909	IL15	1
XCL2	0.0013433	Immature B cell	1			Macrophage	4.40988	IL15	1
XCL1	-0.00068584	Immature B cell	-1			Mast cell	-6.97821	IL15	-1
PPBP	0.002501	Immature B cell	1			Natural killer T cell	9.47135	IL15	1
PF4	0.00040793	Immature B cell	1			Plasmacytoid dendritic cell	4.09268	IL15	1
CXCL5	-0.0011578	Immature B cell	-1			Regulatory T cell	8.72528	IL15	1
CXCL13	0.00062155	Immature B cell	1			Type 1 T helper cell	-3.62609	IL15	-1
CXCL12	-0.0003955	Immature B cell	-1			Activated dendritic cell	-1.00693	IL16	-1
CXCL11	-0.00038371	Immature B cell	-1			Central memory CD4 T cell	1.08159	IL16	1
CXCL10	-0.00079051	Immature B cell	-1			Central memory CD8 T cell	1.35764	IL16	1
CX3CL1	-0.00061178	Immature B cell	-1			Eosinophil	1.3707	IL16	1
CCL8	-0.00036295	Immature B cell	-1			Memory B cell	-1.89476	IL16	-1
CCL5	-0.00043529	Immature B cell	-1			Plasmacytoid dendritic cell	-2.19552	IL16	-1
CCL24	-0.00043085	Immature B cell	-1			Regulatory T cell	-1.75432	IL16	-1
CCL21	0.0018409	Immature B cell	1			Type 17 T helper cell	-1.58172	IL16	-1
CCL20	0.0022014	Immature B cell	1			Type 2 T helper cell	0.808122	IL16	1
CCL2	0.0012035	Immature B cell	1			Activated dendritic cell	6.96038	IL17A	1
CCL19	0.0011185	Immature B cell	1			Plasmacytoid dendritic cell	7.57323	IL17A	1
CCL18	0.001738	Immature B cell	1			Type 1 T helper cell	-6.01914	IL17A	-1
CCL17	-0.0015867	Immature B cell	-1			Type 17 T helper cell	16.2236	IL17A	1
CCL15	0.0018168	Immature B cell	1			Activated CD4 T cell	2.60365	IL17B	1
CCL13	-0.00028748	Immature B cell	-1			CD56dim natural killer cell	5.25503	IL17B	1
XCL2	-0.00271225	Immature dendritic cell	-1			Immature B cell	-3.85753	IL17B	-1
PPBP	-0.00344206	Immature dendritic cell	-1			Immature dendritic cell	-1.93386	IL17B	-1
CXCL2	-0.00126778	Immature dendritic cell	-1			Mast cell	-4.33173	IL17B	-1
CXCL1	0.00237598	Immature dendritic cell	1			Memory B cell	-3.88636	IL17B	-1
CX3CL1	-0.00152253	Immature dendritic cell	-1			Natural killer T cell	3.82077	IL17B	1
CCL8	-0.00144682	Immature dendritic cell	-1			Plasmacytoid dendritic cell	-3.57757	IL17B	-1
CCL4	0.00085161	Immature dendritic cell	1			T follicular helper cell	-1.63268	IL17B	-1
CCL3	-0.00381898	Immature dendritic cell	-1			Type 1 T helper cell	-2.29773	IL17B	-1
CCL16	-0.00169263	Immature dendritic cell	-1			Type 17 T helper cell	-3.27007	IL17B	-1
CCL15	0.00298884	Immature dendritic cell	1			Activated CD8 T cell	1.76785	IL17C	1
CCL13	0.00122008	Immature dendritic cell	1			CD56dim natural killer cell	-2.16202	IL17C	-1
PPBP	-0.00254539	Macrophage	-1			Eosinophil	-3.91743	IL17C	-1
CXCL2	-0.0061456	Macrophage	-1			Macrophage	1.69374	IL17C	1
CCL4	0.0050116	Macrophage	1			Memory B cell	1.50204	IL17C	1
CCL3	-0.0126703	Macrophage	-1	*		Natural killer T cell	1.72293	IL17C	1
CCL23	0.00317914	Macrophage	1			Regulatory T cell	2.09037	IL17C	1
CCL14	0.00949368	Macrophage	1			Type 17 T helper cell	1.71769	IL17C	1
CCL1	0.00677691	Macrophage	1			CD56bright natural killer cell	1.97962	IL17D	1
CXCL5	0.0040841	Mast cell	1			CD56dim natural killer cell	2.19036	IL17D	1
CXCL2	0.017135	Mast cell	1			Effector memeory CD4 T cell	1.54753	IL17D	1
CX3CL1	-0.012097	Mast cell	-1			Effector memeory CD8 T cell	-1.36695	IL17D	-1
CCL3	-0.016629	Mast cell	-1			Eosinophil	-2.36157	IL17D	-1
CCL13	0.017599	Mast cell	1			Macrophage	2.89715	IL17D	1
CXCL5	-0.0025996	MDSC	-1			Memory B cell	-2.16465	IL17D	-1
CXCL3	0.0016761	MDSC	1			Monocyte	-1.43475	IL17D	-1
CXCL2	-0.0016698	MDSC	-1			Natural killer cell	1.73347	IL17D	1
CXCL13	-0.0015491	MDSC	-1			T follicular helper cell	-2.23665	IL17D	-1
CXCL1	0.0023654	MDSC	1			Activated dendritic cell	2.40616	IL17F	1
CCL8	0.0018818	MDSC	1			Mast cell	3.59963	IL17F	1
CCL3	-0.0050487	MDSC	-1			Memory B cell	5.10042	IL17F	1
CCL26	-0.0043659	MDSC	-1			Monocyte	-3.7326	IL17F	-1
CCL20	-0.0029233	MDSC	-1			Natural killer cell	4.84539	IL17F	1
XCL2	0.00593075	Memory B cell	1			Natural killer T cell	-5.9381	IL17F	-1
XCL1	-0.00286891	Memory B cell	-1			Neutrophil	-3.04857	IL17F	-1
PF4	0.00266794	Memory B cell	1	*		Plasmacytoid dendritic cell	4.66172	IL17F	1
CXCL3	0.00274069	Memory B cell	1			Type 17 T helper cell	5.30867	IL17F	1
CXCL2	0.00314427	Memory B cell	1			Activated CD4 T cell	0.891927	IL18	1
CXCL13	0.00281027	Memory B cell	1	*		CD56dim natural killer cell	1.26587	IL18	1
CXCL11	-0.00234833	Memory B cell	-1			Effector memeory CD4 T cell	1.27731	IL18	1
CX3CL1	-0.00293286	Memory B cell	-1			Eosinophil	-3.12585	IL18	-1
CCL3	0.0060835	Memory B cell	1	*		Macrophage	1.41567	IL18	1
CCL21	0.0106868	Memory B cell	1	*		Mast cell	1.08174	IL18	1
CCL19	-0.00407305	Memory B cell	-1			Monocyte	-1.09541	IL18	-1
CCL16	0.00259068	Memory B cell	1			Natural killer cell	1.00211	IL18	1
CXCL11	0.0107106	Monocyte	1			Plasmacytoid dendritic cell	1.26393	IL18	1
CCL3	0.00725185	Monocyte	1			Regulatory T cell	1.9062	IL18	1
CCL25	-0.00829583	Monocyte	-1			Type 17 T helper cell	0.890833	IL18	1
CCL21	-0.00411197	Monocyte	-1	*		Activated CD4 T cell	1.32888	IL19	1
CCL15	-0.00303408	Monocyte	-1			Central memory CD4 T cell	-1.198	IL19	-1
CCL13	-0.0106548	Monocyte	-1			Eosinophil	-1.52722	IL19	-1
XCL1	-0.0063578	Natural killer cell	-1			Immature B cell	-0.992216	IL19	-1
PPBP	-0.0018303	Natural killer cell	-1			Immature dendritic cell	-0.952832	IL19	-1
CXCL9	0.0046413	Natural killer cell	1			Memory B cell	-1.56465	IL19	-1
CXCL11	-0.0054923	Natural killer cell	-1			Natural killer T cell	1.35864	IL19	1
CCL4	0.0049484	Natural killer cell	1			Regulatory T cell	1.55303	IL19	1
CCL28	0.0025062	Natural killer cell	1			T follicular helper cell	-0.9913	IL19	-1
CCL25	0.0057465	Natural killer cell	1			Central memory CD4 T cell	-2.0145	IL20	-1
CCL18	0.0028231	Natural killer cell	1			Central memory CD8 T cell	-1.70852	IL20	-1
CCL14	0.0079924	Natural killer cell	1			Effector memeory CD4 T cell	3.46565	IL20	1
CCL11	0.0038693	Natural killer cell	1			Eosinophil	-3.71321	IL20	-1
XCL2	-0.0027529	Natural killer T cell	-1			Mast cell	-1.31745	IL20	-1
XCL1	0.010794	Natural killer T cell	1			Memory B cell	1.83596	IL20	1
CXCL12	0.0049087	Natural killer T cell	1			Natural killer T cell	2.61866	IL20	1
CX3CL1	0.0097552	Natural killer T cell	1			Neutrophil	1.47059	IL20	1
CCL5	-0.0098605	Natural killer T cell	-1			Plasmacytoid dendritic cell	1.92774	IL20	1
CCL28	-0.0022488	Natural killer T cell	-1			Regulatory T cell	2.59702	IL20	1
CCL21	-0.006028	Natural killer T cell	-1			Type 17 T helper cell	1.74633	IL20	1
CCL18	-0.0024751	Natural killer T cell	-1			Type 2 T helper cell	-1.80503	IL20	-1
CCL13	0.0055562	Natural killer T cell	1			Activated B cell	1.4808	IL21	1
CXCL10	0.0014863	Neutrophil	1			Central memory CD4 T cell	-1.8704	IL21	-1
CX3CL1	0.00064731	Neutrophil	1			Effector memeory CD8 T cell	1.7549	IL21	1
CCL21	-0.0012271	Neutrophil	-1			Immature B cell	2.3888	IL21	1
CCL15	-0.0019023	Neutrophil	-1			Macrophage	2.5062	IL21	1
XCL1	-0.0060323	Plasmacytoid dendritic cell	-1			Natural killer T cell	2.7531	IL21	1
CXCL9	0.00384	Plasmacytoid dendritic cell	1			Plasmacytoid dendritic cell	2.238	IL21	1
CXCL2	-0.0035706	Plasmacytoid dendritic cell	-1			Regulatory T cell	2.204	IL21	1
CXCL11	-0.0062657	Plasmacytoid dendritic cell	-1			Activated CD4 T cell	2.41453	IL22	1
CX3CL1	-0.0053676	Plasmacytoid dendritic cell	-1			Activated CD8 T cell	3.04914	IL22	1
CCL5	-0.0045377	Plasmacytoid dendritic cell	-1			Effector memeory CD4 T cell	2.55309	IL22	1
CCL4	0.0028213	Plasmacytoid dendritic cell	1			Eosinophil	-3.70682	IL22	-1
CCL14	0.0054021	Plasmacytoid dendritic cell	1			Immature B cell	-2.98773	IL22	-1
CCL13	0.0055091	Plasmacytoid dendritic cell	1			Monocyte	-2.28566	IL22	-1
PPBP	0.00267319	Regulatory T cell	1			Natural killer cell	3.32054	IL22	1
CXCL5	0.00352709	Regulatory T cell	1			T follicular helper cell	-2.22821	IL22	-1
CXCL11	-0.0106269	Regulatory T cell	-1			Type 2 T helper cell	-1.73605	IL22	-1
CXCL1	-0.00406341	Regulatory T cell	-1			Activated B cell	-8.84414	IL23A	-1
CCL8	-0.00672371	Regulatory T cell	-1			Effector memeory CD8 T cell	4.17032	IL23A	1
CCL5	-0.00895035	Regulatory T cell	-1			MDSC	-5.58661	IL23A	-1
CCL4	0.00594805	Regulatory T cell	1			Natural killer T cell	-11.0929	IL23A	-1
CCL21	-0.00599232	Regulatory T cell	-1			Regulatory T cell	4.6429	IL23A	1
CCL13	0.00433983	Regulatory T cell	1			Type 17 T helper cell	12.4227	IL23A	1
XCL1	0.0012273	T follicular helper cell	1			Type 2 T helper cell	6.49068	IL23A	1
PPBP	-0.0019878	T follicular helper cell	-1			CD56bright natural killer cell	-3.0699	IL24	-1
PF4	0.0018844	T follicular helper cell	1			Effector memeory CD8 T cell	2.38401	IL24	1
CXCL13	0.0021144	T follicular helper cell	1			Eosinophil	2.57383	IL24	1
CXCL12	-0.0021636	T follicular helper cell	-1			Gamma delta T cell	-2.59394	IL24	-1
CXCL11	0.0013149	T follicular helper cell	1			Macrophage	2.77071	IL24	1
CCL26	-0.0025226	T follicular helper cell	-1			Natural killer cell	4.50466	IL24	1
CCL23	0.0019523	T follicular helper cell	1			Type 1 T helper cell	-7.37178	IL24	-1
CCL15	0.0018537	T follicular helper cell	1			Activated dendritic cell	1.44353	IL25	1
XCL2	0.0030716	Type 1 T helper cell	1			CD56dim natural killer cell	1.56286	IL25	1
XCL1	-0.012879	Type 1 T helper cell	-1			Central memory CD4 T cell	1.94502	IL25	1
CX3CL1	-0.0043188	Type 1 T helper cell	-1			Central memory CD8 T cell	-2.81916	IL25	-1
CCL20	-0.0018186	Type 1 T helper cell	-1			Eosinophil	-2.07086	IL25	-1
XCL1	-0.00081606	Type 17 T helper cell	-1			Immature B cell	2.91097	IL25	1
PF4	0.00088578	Type 17 T helper cell	1			Immature dendritic cell	3.22854	IL25	1
CXCL3	0.00074602	Type 17 T helper cell	1			MDSC	2.48422	IL25	1
CXCL13	0.001189	Type 17 T helper cell	1			Monocyte	-2.3515	IL25	-1
CXCL11	-0.00095323	Type 17 T helper cell	-1			Natural killer cell	4.11295	IL25	1
CX3CL1	-0.0019546	Type 17 T helper cell	-1			Natural killer T cell	-2.91236	IL25	-1
CCL8	-0.0013567	Type 17 T helper cell	-1			Plasmacytoid dendritic cell	1.89111	IL25	1
CCL4	0.00059882	Type 17 T helper cell	1			Type 1 T helper cell	1.68667	IL25	1
CCL3	0.00089471	Type 17 T helper cell	1			Activated B cell	-0.75057	IL26	-1
CCL23	-0.0018337	Type 17 T helper cell	-1			Activated CD8 T cell	0.92433	IL26	1
CCL21	0.0028915	Type 17 T helper cell	1			CD56dim natural killer cell	2.2874	IL26	1
CCL20	0.001308	Type 17 T helper cell	1			Central memory CD8 T cell	1.56659	IL26	1
CCL2	0.0026871	Type 17 T helper cell	1			Effector memeory CD4 T cell	-1.021	IL26	-1
CCL18	0.0034758	Type 17 T helper cell	1			Effector memeory CD8 T cell	1.51493	IL26	1
CCL17	-0.0021266	Type 17 T helper cell	-1			Eosinophil	2.3103	IL26	1
* Statistically significant immune cells and chemokines inT1/2 to T3/4						Gamma delta T cell	-0.97499	IL26	-1
						Plasmacytoid dendritic cell	-1.18534	IL26	-1
						Regulatory T cell	-1.56149	IL26	-1
						Type 2 T helper cell	1.74037	IL26	1
						Effector memeory CD4 T cell	1.17667	IL27	1
						Eosinophil	-1.98273	IL27	-1
						Immature B cell	1.45938	IL27	1
						Macrophage	1.44937	IL27	1
						Monocyte	-1.38579	IL27	-1
						Natural killer T cell	1.01673	IL27	1
						Regulatory T cell	1.35979	IL27	1
						Type 2 T helper cell	0.875018	IL27	1
						CD56dim natural killer cell	3.59451	IL31	1
						Effector memeory CD4 T cell	3.21422	IL31	1
						Eosinophil	-5.01732	IL31	-1
						Macrophage	1.75024	IL31	1
						Mast cell	-3.00848	IL31	-1
						Natural killer T cell	2.21555	IL31	1
						Plasmacytoid dendritic cell	4.43366	IL31	1
						Regulatory T cell	6.55835	IL31	1
						T follicular helper cell	-1.6568	IL31	-1
						Type 1 T helper cell	-1.90133	IL31	-1
						Type 17 T helper cell	2.92872	IL31	1
						Activated B cell	-1.90933	IL32	-1
						Activated dendritic cell	-1.3222	IL32	-1
						CD56bright natural killer cell	-2.07967	IL32	-1
						Eosinophil	2.07145	IL32	1
						Gamma delta T cell	-2.09011	IL32	-1
						Immature B cell	-2.19775	IL32	-1
						Immature dendritic cell	-1.78528	IL32	-1
						Mast cell	-2.46412	IL32	-1
						Memory B cell	-4.64086	IL32	-1
						Monocyte	1.74377	IL32	1
						Natural killer cell	-2.55896	IL32	-1
						Natural killer T cell	3.64762	IL32	1
						Neutrophil	1.34498	IL32	1
						Plasmacytoid dendritic cell	-4.30697	IL32	-1
						Type 1 T helper cell	-1.97235	IL32	-1
						Type 17 T helper cell	-4.03819	IL32	-1
						Type 2 T helper cell	1.03866	IL32	1
						Activated B cell	-2.93951	IL33	-1
						Activated CD8 T cell	1.90825	IL33	1
						CD56dim natural killer cell	4.38705	IL33	1
						Central memory CD8 T cell	1.54401	IL33	1
						Eosinophil	2.24192	IL33	1
						Gamma delta T cell	-2.60951	IL33	-1
						Mast cell	-2.75544	IL33	-1
						MDSC	2.99712	IL33	1
						Memory B cell	-4.98995	IL33	-1
						Type 17 T helper cell	-1.833	IL33	-1
						Type 2 T helper cell	2.23552	IL33	1
						Activated CD8 T cell	3.56264	IL34	1
						CD56dim natural killer cell	2.79691	IL34	1
						Macrophage	-3.46631	IL34	-1
						MDSC	3.49073	IL34	1
						Natural killer T cell	6.55396	IL34	1
						Plasmacytoid dendritic cell	2.87338	IL34	1
						Regulatory T cell	-3.09089	IL34	-1
						Central memory CD4 T cell	3.18018	IL14	1
						Central memory CD8 T cell	-4.81345	IL14	-1
						MDSC	-5.08348	IL14	-1
						Memory B cell	3.74246	IL14	1
						Monocyte	-5.41351	IL14	-1
						Natural killer cell	4.72335	IL14	1
						Natural killer T cell	-3.41862	IL14	-1
						Neutrophil	-4.03915	IL14	-1
						Regulatory T cell	9.17882	IL14	1
						* Statistically significant immune cells and interleukins in T1/2 to T3/4
